# Supplementary material for: Isolation and Comprehensive in Silico Characterisation of a New 3-Hydroxy-3-Methylglutaryl-Coenzyme A Reductase 4 (HMGR4) Gene Promoter from Salvia miltiorrhiza: Comparative Analyses of Plant HMGR Promoters
Source: MDPI journal article supplement (doi:10.3390/plants11141861), 2022-07-16
Supplement: s1 [file s1]

**Table S4.** Primers used in the study.

| Primer name                                       | Sequence                      |
|---------------------------------------------------|-------------------------------|
| <b>Genome Walker gene-specific primers (GSPs)</b> |                               |
| GSP1                                              | GGTGAAGAAAATGCCGTTGGTTAGGAAGA |
| GSP2                                              | TGTGGCGGAGTGAGGCGACGGCGGTTT   |
| <b>Sanger sequencing of <i>HMGR4</i> promoter</b> |                               |
| M13_F                                             | GTAAAACGACGGCCAG              |
| M13_R                                             | CAGGAAACAGCTATGAC             |
| HMGR4_F                                           | TTGTGCAGTGCGAACCAACCAA        |
| HMGR4_R                                           | GCATGACATAGTTCTTTTAGG         |
