# Supplementary material for: Isolation and Comprehensive in Silico Characterisation of a New 3-Hydroxy-3-Methylglutaryl-Coenzyme A Reductase 4 (HMGR4) Gene Promoter from Salvia miltiorrhiza: Comparative Analyses of Plant HMGR Promoters
Source: MDPI journal article supplement (doi:10.3390/plants11141861), 2022-07-16
Supplement: s1 [file s1]

**Table S1.** TFs responsive to light, hormone, wounding and pathogen stimulation found in the entire *S. miltiorrhiza* HMGR4 promoter sequence using PlantPan 2.0 database.

| TF family name                        | TF name                                                                                                           |
|---------------------------------------|-------------------------------------------------------------------------------------------------------------------|
| <b>light-responsive TFs</b>           |                                                                                                                   |
| bHLH                                  | BHLH63, PIF1                                                                                                      |
| bZIP                                  | BZIP54                                                                                                            |
| Dehydrin                              | COR15A                                                                                                            |
| Dof                                   | DOF1.5, DOF1.10, DOF2.5, DOF3.3, DOF5.2                                                                           |
| GATA                                  | GATA1, GATA2, GATA3, GATA4, GATA5, GATA8, GATA9, GATA21, GATA22, GATA23                                           |
| Homeodomain; bZIP; HD-ZIP             | ATHB-1                                                                                                            |
| Homeodomain; HD-ZIP                   | ATHB-2, ATHB-4, ATHB-16                                                                                           |
| MYB-related/Myb/SANT                  | RVE7                                                                                                              |
| NAC; NAM                              | NAC081                                                                                                            |
| <b>auxin-responsive TFs</b>           |                                                                                                                   |
| bHLH                                  | BEE1, BEE3                                                                                                        |
| Dof                                   | DOF1.1, DOF3.4, DOF3.6                                                                                            |
| Homeodomain; bZIP; HD-ZIP             | ATHB-15                                                                                                           |
| Homeodomain; HB-PHD                   | PRH                                                                                                               |
| Homeodomain; HD-ZIP                   | ATHB-2, ATHB-20                                                                                                   |
| MADS box ;MIKC                        | AGL14, AGL15                                                                                                      |
| MYB-related                           | CCA1, RVE4, RVE5, RVE8                                                                                            |
| Myb/SANT; MYB                         | MYB6                                                                                                              |
| NAC; NAM                              | NAC030, NAC101                                                                                                    |
| WRKY                                  | WRKY23                                                                                                            |
| <b>SA-responsive TFs</b>              |                                                                                                                   |
| bHLH                                  | BHLH66                                                                                                            |
| CAMTA                                 | CAMTA2, CAMTA4, CAMTA6                                                                                            |
| CSD                                   | CSP2                                                                                                              |
| Dof                                   | DOF1.1, DOF3.4, DOF3.6                                                                                            |
| MYB                                   | MYB46                                                                                                             |
| MYB-related                           | CCA1, RVE4, RVE5, RVE6, RVE8                                                                                      |
| Myb/SANT                              | MYB3, MYB6                                                                                                        |
| NAC; NAM                              | NAC062, NAC081                                                                                                    |
| WRKY                                  | WRKY3, WRKY4, WRKY6, WRKY7, WRKY8, WRKY15, WRKY18, WRKY21, WRKY26, WRKY30, WRKY40, WRKY53, WRKY54, WRKY60, WRKY70 |
| <b>brassinosteroid-responsive TFs</b> |                                                                                                                   |
| AP2; B3; RAV                          | RAV1                                                                                                              |
| bHLH                                  | BEE1, BEE3                                                                                                        |
| NAC; NAM                              | NAC030, NAC081, NAC101                                                                                            |
| <b>ethylene-responsive TFs</b>        |                                                                                                                   |
| AP2; ERF                              | RAP2-2                                                                                                            |
| bHLH                                  | BEE1, BEE3, BHLH66                                                                                                |
| C2H2                                  | AZF2, AZF3                                                                                                        |
| CAMTA                                 | CAMTA1, CAMTA4                                                                                                    |
| CG-1; CAMTA                           | CAMTA3                                                                                                            |
| CSD                                   | CSP2                                                                                                              |
| MYB-related                           | CCA1, RVE4, RVE5, RVE6, RVE8                                                                                      |
| MYB-related/Myb/SANT                  | RVE7                                                                                                              |
| Myb/SANT;ARR-B                        | ARR2                                                                                                              |
| Myb/SANT; MYB                         | MYB6                                                                                                              |
| NAC; NAM                              | NAC029                                                                                                            |
| WRKY                                  | WRKY4, WRKY6                                                                                                      |
| <b>ABA-responsive TFs</b>             |                                                                                                                   |

|                                |                                                                                                     |
|--------------------------------|-----------------------------------------------------------------------------------------------------|
| bHLH                           | BEE1, BEE3, MYC2, SCRM                                                                              |
| bZIP                           | ABF3, ABF4                                                                                          |
| C2H2                           | AZF2, AZF, ZAT10                                                                                    |
| CG-1; CAMTA                    | CAMTA2, CAMTA4, CAMTA6                                                                              |
| CSD                            | CSP2                                                                                                |
| Dehydrin                       | COR15A                                                                                              |
| Homeodomain; HD-ZIP            | HAT22                                                                                               |
| MYB-related                    | CCA1, RVE4, RVE5, RVE6, RVE8                                                                        |
| Myb/SANT                       | MYB7                                                                                                |
| Myb/SANT; MYB                  | MYB3                                                                                                |
| NAC; NAM                       | NAC019, NAC029, NAC032, NAC055, NAC062, NAC072                                                      |
| WRKY                           | WRKY8                                                                                               |
| ZF-HD                          | ZHD5                                                                                                |
| <b>MeJa-responsive TFs</b>     |                                                                                                     |
| AP2; ERF                       | RAP2-3                                                                                              |
| bHLH                           | MYC2                                                                                                |
| CAMTA                          | CAMTA1, CAMTA4                                                                                      |
| CG-1; CAMTA                    | CAMTA3                                                                                              |
| NAC; NAM                       | NAC081                                                                                              |
| <b>wounding-responsive TFs</b> |                                                                                                     |
| C2H2                           | ZAT10                                                                                               |
| CAMTA                          | CAMTA1, CAMTA4, CAMTA6                                                                              |
| CG-1; CAMTA                    | CAMTA2, CAMTA3                                                                                      |
| NAC; NAM                       | NAC002, NAC081                                                                                      |
| WRKY                           | WRKY6, WRKY8, WRKY20, WRKY40                                                                        |
| <b>pathogen-responsive TFs</b> |                                                                                                     |
| CG-1; CAMTA                    | CAMTA3                                                                                              |
| Homeodomain; HB-PHD            | PRH                                                                                                 |
| Myb/SANT; MYB                  | MYB6                                                                                                |
| NAC; NAM                       | NAC081, NAC091                                                                                      |
| SBP                            | SPL14                                                                                               |
| WRKY                           | WRKY4, WRKY6, WRKY8, WRKY11, WRKY17, WRKY18, WRKY23, WRKY27, WRKY33, WRKY38, WRKY48, WRKY53, WRKY60 |
