# Supplementary material for: Isolation and Comprehensive in Silico Characterisation of a New 3-Hydroxy-3-Methylglutaryl-Coenzyme A Reductase 4 (HMGR4) Gene Promoter from Salvia miltiorrhiza: Comparative Analyses of Plant HMGR Promoters
Source: MDPI journal article supplement (doi:10.3390/plants11141861), 2022-07-16
Supplement: s1 [file s1]

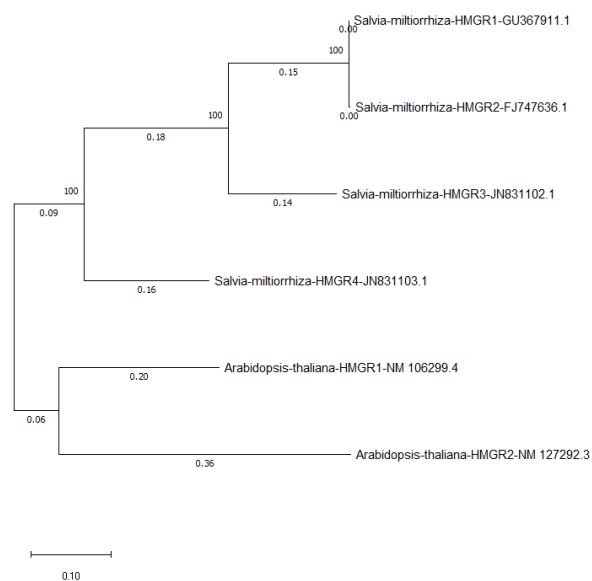

**Figure S1.** Unrooted dendrogram of *HMGR* sequences from *S. miltiorrhiza* and *A. thaliana* constructed by Maximum Likelihood method and bootstrap test with 1,000 replicates using the MEGA X program.
