# Supplementary material for: Isolation and Comprehensive in Silico Characterisation of a New 3-Hydroxy-3-Methylglutaryl-Coenzyme A Reductase 4 (HMGR4) Gene Promoter from Salvia miltiorrhiza: Comparative Analyses of Plant HMGR Promoters
Source: MDPI journal article supplement (doi:10.3390/plants11141861), 2022-07-16
Supplement: s1 [file s1]

**Table S3.** TF genes co-expressed with *A. thaliana* HMGR1 found with the Expression Angler tool.

| TF locus name                                       | TF gene name                                            | r-value <sup>a</sup> |
|-----------------------------------------------------|---------------------------------------------------------|----------------------|
| <b>AtGenExpress Hormone and Chemical Compendium</b> |                                                         |                      |
| At5g17300                                           | <i>RVE1</i>                                             | 0.501                |
| At1g06850                                           | <i>AtbZIP52</i>                                         | 0.501                |
| At2g01760                                           | <i>ARR14</i>                                            | 0.509                |
| At1g33240                                           | <i>GTL1</i>                                             | 0.509                |
| At1g19700                                           | <i>BLH10</i>                                            | 0.516                |
| At1g64380                                           | <i>ERF061</i>                                           | 0.516                |
| At5g44190                                           | <i>GLK2</i>                                             | 0.520                |
| At5g54630                                           | <i>MRB17.13</i>                                         | 0.521                |
| At1g06040                                           | <i>BBX24</i>                                            | 0.522                |
| At5g25810                                           | <i>TINY</i>                                             | 0.527                |
| At3g23050                                           | <i>IAA7</i>                                             | 0.538                |
| At5g13770                                           | Pentatricopeptide repeat (PPR-like) superfamily protein | 0.544                |
| At1g22590                                           | <i>AGL87</i>                                            | 0.547                |
| At1g69690                                           | <i>TCP15</i>                                            | 0.549                |
| At2g27050                                           | <i>EIL1</i>                                             | 0.554                |
| At3g06590                                           | <i>BHLH148</i>                                          | 0.561                |
| At4g40060                                           | <i>ATHB-16</i>                                          | 0.562                |
| At5g57660                                           | <i>COL5</i>                                             | 0.563                |
| At4g36540                                           | <i>BEE2</i>                                             | 0.566                |
| At4g00150                                           | <i>SCL6</i>                                             | 0.567                |
| At5g02840                                           | <i>RVE4</i>                                             | 0.573                |
| At1g30650                                           | <i>WRKY14</i>                                           | 0.576                |
| At1g13300                                           | <i>HRS1</i>                                             | 0.578                |
| At3g07650                                           | <i>COL9</i>                                             | 0.578                |
| At1g69780                                           | <i>ATHB-13</i>                                          | 0.594                |
| At2g18160                                           | <i>BZIP2</i>                                            | 0.597                |
| At4g09460                                           | <i>MYB6</i>                                             | 0.599                |
| At2g42380                                           | <i>BZIP34</i>                                           | 0.605                |
| At3g05800                                           | <i>BHLH150</i>                                          | 0.609                |
| At2g28200                                           | <i>ZAT5</i>                                             | 0.61                 |
| At1g74840                                           | Homeodomain-like superfamily protein                    | 0.61                 |
| At3g17100                                           | <i>BHLH147</i>                                          | 0.618                |
| At1g68520                                           | <i>BBX14</i>                                            | 0.621                |
| At5g47390                                           | <i>KUA1</i>                                             | 0.623                |
| At3g60490                                           | <i>ERF035</i>                                           | 0.63                 |
| At3g62420                                           | <i>BZIP53</i>                                           | 0.635                |
| At3g58120                                           | <i>BZIP61</i>                                           | 0.64                 |
| At2g23760                                           | <i>BLH4</i>                                             | 0.648                |
| At3g48360                                           | <i>BT2</i>                                              | 0.659                |
| At3g47620                                           | <i>TCP14</i>                                            | 0.704                |
| At5g60850                                           | <i>DOF5.4</i>                                           | 0.727                |
| <b>AtGenExpress Abiotic Stress Compendium</b>       |                                                         |                      |
| At3g16770                                           | <i>RAP2-3</i>                                           | 0.502                |
| At5g46690                                           | <i>BHLH071</i>                                          | 0.502                |
| At1g68190                                           | <i>BBX27</i>                                            | 0.502                |
| At3g47620                                           | <i>TCP14</i>                                            | 0.502                |
| At1g69690                                           | <i>TCP15</i>                                            | 0.503                |
| At2g20570                                           | <i>GLK1</i>                                             | 0.504                |
| At3g12730                                           | Homeodomain-like superfamily protein                    | 0.506                |
| At3g61150                                           | <i>HDG1</i>                                             | 0.507                |

|                                         |                                                          |       |
|-----------------------------------------|----------------------------------------------------------|-------|
| At5g67180                               | <i>TOE3</i>                                              | 0.508 |
| At5g44190                               | <i>GLK2</i>                                              | 0.512 |
| At2g42300                               | <i>BHLH48</i>                                            | 0.518 |
| At5g38140                               | <i>NFYC12</i>                                            | 0.523 |
| At4g00730                               | <i>ANL2</i>                                              | 0.524 |
| At2g46530                               | <i>ARF11</i>                                             | 0.524 |
| At2g02080                               | <i>IDD4</i>                                              | 0.525 |
| At3g48590                               | <i>NFYC1</i>                                             | 0.527 |
| At4g36870                               | <i>BLH2</i>                                              | 0.53  |
| At2g01760                               | <i>ARR14</i>                                             | 0.53  |
| At3g17100                               | <i>BHLH147</i>                                           | 0.537 |
| At2g22540                               | <i>SVP</i>                                               | 0.537 |
| At5g02840                               | <i>RVE4</i>                                              | 0.545 |
| At1g72740                               | Homeodomain-like/winged-helix DNA-binding family protein | 0.545 |
| At3g57800                               | <i>BHLH60</i>                                            | 0.545 |
| At5g08330                               | <i>TCP21</i>                                             | 0.546 |
| At5g05550                               | <i>ENAP2</i>                                             | 0.552 |
| At5g24930                               | <i>COL4</i>                                              | 0.557 |
| At1g10610                               | <i>BHLH90</i>                                            | 0.558 |
| At2g33500                               | <i>BBX12</i>                                             | 0.575 |
| At5g08520                               | <i>MYBS2</i>                                             | 0.575 |
| At1g54060                               | <i>ASIL1</i>                                             | 0.579 |
| At4g21750                               | <i>ATML1</i>                                             | 0.583 |
| At4g04890                               | <i>PDF2</i>                                              | 0.587 |
| At2g33810                               | <i>SPL3</i>                                              | 0.596 |
| At3g19860                               | <i>BHLH121</i>                                           | 0.611 |
| At2g43010                               | <i>PIF4</i>                                              | 0.625 |
| At1g14920                               | <i>GAI</i>                                               | 0.627 |
| At5g62000                               | <i>ARF2</i>                                              | 0.63  |
| <b>AtGenExpress Pathogen compendium</b> |                                                          |       |
| At3g19580                               | <i>AZF2</i>                                              | 0.503 |
| At1g69310                               | <i>WRKY57</i>                                            | 0.504 |
| At1g02220                               | <i>NAC003</i>                                            | 0.505 |
| At1g07530                               | <i>SCL14</i>                                             | 0.516 |
| At1g19850                               | <i>ARF5</i>                                              | 0.515 |
| At3g01970                               | <i>WRKY45</i>                                            | 0.515 |
| At4g39100                               | <i>SHL</i>                                               | 0.52  |
| At3g19860                               | <i>BHLH121</i>                                           | 0.521 |
| At1g62990                               | <i>KNAT7</i>                                             | 0.522 |
| At1g73730                               | <i>EIL3</i>                                              | 0.525 |
| At5g52510                               | <i>SCL8</i>                                              | 0.526 |
| At2g36080                               | <i>ABS2</i>                                              | 0.53  |
| At1g79180                               | <i>MYB63</i>                                             | 0.534 |
| At1g48000                               | <i>MYB112</i>                                            | 0.535 |
| At2g21240                               | <i>BPC4</i>                                              | 0.536 |
| At3g61890                               | <i>ATHB-12</i>                                           | 0.536 |
| At5g49700                               | <i>AHL17</i>                                             | 0.537 |
| At3g06490                               | <i>MYB108</i>                                            | 0.538 |
| At3g51960                               | <i>BZIP24</i>                                            | 0.543 |
| At4g27410                               | <i>NAC072</i>                                            | 0.543 |
| At2g28200                               | <i>ZAT5</i>                                              | 0.547 |
| At1g56010                               | <i>NAC021</i>                                            | 0.554 |
| At1g06180                               | <i>MYB13</i>                                             | 0.557 |
| At3g17100                               | <i>BHLH147</i>                                           | 0.559 |

|                                                    |                                                                               |       |
|----------------------------------------------------|-------------------------------------------------------------------------------|-------|
| At3g58710                                          | WRKY69                                                                        | 0.564 |
| At4g31420                                          | REIL1                                                                         | 0.565 |
| At2g46680                                          | ATHB-7                                                                        | 0.571 |
| At3g20770                                          | EIN3                                                                          | 0.572 |
| At5g13330                                          | RAP2.6L                                                                       | 0.573 |
| At5g24800                                          | BZIP9                                                                         | 0.59  |
| At3g15500                                          | NAC055                                                                        | 0.594 |
| At1g10170                                          | NFXL1                                                                         | 0.599 |
| At2g38340                                          | DREB2E                                                                        | 0.611 |
| At5g39610                                          | NAC92                                                                         | 0.643 |
| <b>AtGenExpress Tissue Compendium</b>              |                                                                               |       |
| At1g77980                                          | AGL66                                                                         | 0.506 |
| At3g15540                                          | IAA19                                                                         | 0.512 |
| At2g40620                                          | BZIP18                                                                        | 0.517 |
| At1g60240                                          | NAC (No Apical Meristem) domain transcriptional regulator superfamily protein | 0.52  |
| At2g03060                                          | AGL30                                                                         | 0.521 |
| At3g01470                                          | HAT5                                                                          | 0.521 |
| At2g32460                                          | MYB101                                                                        | 0.521 |
| At1g72740                                          | Homeodomain-like/winged-helix DNA-binding family protein                      | 0.525 |
| At3g10470                                          | C2H2-type zinc finger family protein                                          | 0.534 |
| At1g18750                                          | AGL65                                                                         | 0.535 |
| At3g16350                                          | Homeodomain-like superfamily protein                                          | 0.539 |
| At2g42380                                          | BZIP34                                                                        | 0.546 |
| At4g08250                                          | SCL26                                                                         | 0.548 |
| At4g16110                                          | ARR2                                                                          | 0.552 |
| At2g47810                                          | NFYB5                                                                         | 0.558 |
| At4g14410                                          | BHLH104                                                                       | 0.563 |
| At5g56270                                          | WRKY2                                                                         | 0.575 |
| At4g35700                                          | DAZ3                                                                          | 0.579 |
| At1g35490                                          | bZIP family transcription factor                                              | 0.582 |
| At5g45710                                          | HSFA4C                                                                        | 0.584 |
| At4g20380                                          | LSD1                                                                          | 0.598 |
| At4g31420                                          | REIL1                                                                         | 0.609 |
| At1g53320                                          | TLP7                                                                          | 0.64  |
| At3g54620                                          | BZIP25                                                                        | 0.666 |
| At1g50640                                          | ERF3                                                                          | 0.721 |
| <b>AtGenExpressPlus Extended Tissue Compendium</b> |                                                                               |       |
| At4g26930                                          | MYB97                                                                         | 0.505 |
| At1g18750                                          | AGL65                                                                         | 0.51  |
| At4g35700                                          | DAZ3                                                                          | 0.512 |
| At2g23340                                          | DEAR3                                                                         | 0.516 |
| At2g01930                                          | BPC1                                                                          | 0.519 |
| At5g67580                                          | TRB2                                                                          | 0.525 |
| At2g34440                                          | AGL29                                                                         | 0.53  |
| At3g20310                                          | ERF7                                                                          | 0.534 |
| At2g32460                                          | MYB101                                                                        | 0.545 |
| At2g03060                                          | AGL30                                                                         | 0.547 |
| At1g35490                                          | bZIP family transcription factor                                              | 0.553 |
| At5g56270                                          | WRKY2                                                                         | 0.557 |
| At1g34190                                          | NAC017                                                                        | 0.558 |
| At3g57390                                          | AGL18                                                                         | 0.567 |
| At2g42380                                          | BZIP34                                                                        | 0.572 |
| At3g20770                                          | EIN3                                                                          | 0.572 |
| At2g40620                                          | BZIP18                                                                        | 0.572 |

|           |                                      |       |
|-----------|--------------------------------------|-------|
| At3g16350 | Homeodomain-like superfamily protein | 0.601 |
| At4g37180 | <i>HHO5</i>                          | 0.601 |
| At5g46910 | <i>JMJ13</i>                         | 0.604 |
| At4g16110 | <i>ARR2</i>                          | 0.611 |
| At5g54680 | <i>BHLH105</i>                       | 0.64  |
| At4g13980 | <i>HSFA5</i>                         | 0.644 |
| At1g55520 | <i>TBP2</i>                          | 0.645 |
| At4g31420 | <i>REIL1</i>                         | 0.661 |
| At4g20380 | <i>LSD1</i>                          | 0.665 |
| At1g50640 | <i>ERF3</i>                          | 0.666 |
| At1g53320 | <i>TLP7</i>                          | 0.667 |
| At5g45710 | <i>HSFA4C</i>                        | 0.790 |

<sup>a</sup> The *r*-value was 0.5 - 1.0.
