# Supplementary material for: Isolation and Comprehensive in Silico Characterisation of a New 3-Hydroxy-3-Methylglutaryl-Coenzyme A Reductase 4 (HMGR4) Gene Promoter from Salvia miltiorrhiza: Comparative Analyses of Plant HMGR Promoters
Source: MDPI journal article supplement (doi:10.3390/plants11141861), 2022-07-16
Supplement: s1 [file s1]

**Table S2.** TFs responsive to major abiotic and biotic factors found in the proximal *S. miltiorrhiza* HMGR4 promoter using the PlantPan 2.0 database.

| TF family name                    | TF name                                                                                                                   |
|-----------------------------------|---------------------------------------------------------------------------------------------------------------------------|
| <b>light-responsive TFs</b>       |                                                                                                                           |
| bHLH                              | MYC2                                                                                                                      |
| Dehydrin                          | COR15A                                                                                                                    |
| Dof                               | DOF1.5, DOF2.5                                                                                                            |
| GATA                              | GATA1, GATA2, GATA3, GATA4, GATA5, GATA8, GATA9, GATA12, GATA21, GATA22, GATA23                                           |
| MADF;Trihelix                     | GT-1                                                                                                                      |
| MYB-related/Myb/SANT              | RVE7                                                                                                                      |
| NF-YA                             | NFYA5                                                                                                                     |
| NF-YB                             | NFYB9                                                                                                                     |
| <b>SA-responsive TFs</b>          |                                                                                                                           |
| bZIP                              | TGA1, TGA2, TGA3, TGA5, TGA7                                                                                              |
| Dof                               | DOF1.1, DOF3.4, DOF3.6                                                                                                    |
| MYB                               | MYB46                                                                                                                     |
| MYB-related                       | RVE4, RVE6, RVE8                                                                                                          |
| WRKY                              | WRKY3, WRKY4, WRKY6, WRKY7, WRKY8, WRKY15, WRKY18, WRKY21, WRKY26, WRKY30, WRKY38, WRKY40, WRKY53, WRKY54, WRKY60, WRKY70 |
| <b>bacterium-responsive TFs</b>   |                                                                                                                           |
| bZIP                              | TGA3, TGA7                                                                                                                |
| WRKY                              | WRKY8, WRKY11, WRKY17, WRKY18, WRKY27, WRKY33, WRKY38, WRKY40, WRKY48, WRKY52, WRKY53, WRKY60, WRKY70                     |
| <b>auxin-responsive TFs</b>       |                                                                                                                           |
| bZIP                              | TGA1, TGA2, TGA3, TGA5, TGA7                                                                                              |
| C2H2                              | AZF2                                                                                                                      |
| Dof                               | DOF1.1, DOF3.4, DOF3.6                                                                                                    |
| Homeodomain; HB-PHD               | PRH                                                                                                                       |
| MADS box; MIKC                    | AGL14, AGL15                                                                                                              |
| MYB-related                       | RVE4, RVE5, RVE8                                                                                                          |
| WRKY                              | WRKY23                                                                                                                    |
| <b>ABA-responsive TFs</b>         |                                                                                                                           |
| bHLH                              | SCRM, MYC2                                                                                                                |
| C2H2                              | AZF2, AZF3, ZAT10                                                                                                         |
| Dehydrin                          | COR15A                                                                                                                    |
| MYB-related                       | RVE4, RVE5, RVE6, RVE8                                                                                                    |
| NF-YA                             | NFYA5                                                                                                                     |
| NF-YB                             | NFYB6, NFYB9                                                                                                              |
| NF-YC                             | NFYC3                                                                                                                     |
| WRKY                              | WRKY8, WRKY25, WRKY33                                                                                                     |
| <b>gibberellin-responsive TFs</b> |                                                                                                                           |
| MADS box                          | AGL42, AGL71, AGL72                                                                                                       |
| MYB-related                       | RVE4, RVE5, RVE6, RVE8                                                                                                    |
| WRKY                              | WRKY27                                                                                                                    |
| <b>chitin-responsive TFs</b>      |                                                                                                                           |
| C2H2                              | ZAT10                                                                                                                     |
| Dof                               | DOF1.7                                                                                                                    |
| WRKY                              | WRKY6, WRKY11, WRKY17, WRKY18, WRKY22, WRKY33, WRKY40, WRKY46, WRKY48, WRKY53, WRKY70                                     |
| <b>cold-responsive TFs</b>        |                                                                                                                           |
| bHLH                              | SCRM                                                                                                                      |
| C2H2                              | AZF2, AZF3, ZAT6, ZAT10                                                                                                   |
| Dehydrin                          | COR15A                                                                                                                    |

|                                   |                                       |
|-----------------------------------|---------------------------------------|
| Dof                               | DOF2.5                                |
| MADS box; MIKC                    | AGL19                                 |
| WRKY                              | WRKY25, WRKY33, WRKY34                |
| <b>salt stress-responsive TFs</b> |                                       |
| bHLH                              | MYC2, SCRM                            |
| C2H2                              | AZF3, ZAT10                           |
| Dehydrin                          | COR15A                                |
| MYB-related                       | RVE3, RVE4, RVE5, RVE6, RVE8          |
| MYB-related/Myb/SANT              | RVE7                                  |
| WRKY                              | WRKY8, WRKY25, WRKY33, WRKY46, WRKY57 |
