# Supplementary material for: Isolation and Comprehensive in Silico Characterisation of a New 3-Hydroxy-3-Methylglutaryl-Coenzyme A Reductase 4 (HMGR4) Gene Promoter from Salvia miltiorrhiza: Comparative Analyses of Plant HMGR Promoters
Source: Plants (Basel). 2022 Jul 16;11(14):1861. doi: 10.3390/plants11141861 (PMC9318348; doi:10.3390/plants11141861)
Supplement: Supplementary file 1 [file plants-11-01861-s001.zip › File S1.xlsx]

## Sheet: Arkusz1
TFBSs	TFBSs site	Strand	Similarity score	TF gene name and locus	TF family name	Species	External factor	TF role
TAATT	308	-	1	AHL12	AT-Hook	A. thaliana		binds AT-rich DNA sequences related to the nuclear matrix attachment regions (MARs)
TAATT	310	+	0.97	AHL12	AT-Hook	A. thaliana		binds AT-rich DNA sequences related to the nuclear matrix attachment regions (MARs)
TAATT	1220	+	0.93	AHL12	AT-Hook	A. thaliana		binds AT-rich DNA sequences related to the nuclear matrix attachment regions (MARs)
TAATT	1300	+	0.92	AHL12	AT-Hook	A. thaliana		binds AT-rich DNA sequences related to the nuclear matrix attachment regions (MARs)
TATAT	741	-	0.98	AHL12	AT-Hook	A. thaliana		binds AT-rich DNA sequences related to the nuclear matrix attachment regions (MARs)
TATAT	743	-	1	AHL12	AT-Hook	A. thaliana		binds AT-rich DNA sequences related to the nuclear matrix attachment regions (MARs)
AATTA	855	-	0.97	AHL12	AT-Hook	A. thaliana		binds AT-rich DNA sequences related to the nuclear matrix attachment regions (MARs)
ATATA	743	+	1	AHL12	AT-Hook	A. thaliana		binds AT-rich DNA sequences related to the nuclear matrix attachment regions (MARs)
AATAT	1263	+	0.9	AHL20	AT-Hook	A. thaliana		binds AT-rich DNA sequences related to the nuclear matrix attachment regions (MARs); negatively regulates plant innate immunity (PTI) to pathogens through the down-regulation of the PAMP-triggered NHO1 and FRK1 expression (PubMed:20738724)
ATTAA	1268	+	0.97	AHL20	AT-Hook	A. thaliana		binds AT-rich DNA sequences related to the nuclear matrix attachment regions (MARs); negatively regulates plant innate immunity (PTI) to pathogens through the down-regulation of the PAMP-triggered NHO1 and FRK1 expression (PubMed:20738724)
ATTAT	671	+	0.94	AHL20	AT-Hook	A. thaliana		binds AT-rich DNA sequences related to the nuclear matrix attachment regions (MARs); negatively regulates plant innate immunity (PTI) to pathogens through the down-regulation of the PAMP-triggered NHO1 and FRK1 expression (PubMed:20738724)
ATAAT	1263	-	0.96	AHL20	AT-Hook	A. thaliana		binds AT-rich DNA sequences related to the nuclear matrix attachment regions (MARs); negatively regulates plant innate immunity (PTI) to pathogens through the down-regulation of the PAMP-triggered NHO1 and FRK1 expression (PubMed:20738724)
ATATT	345	-	0.95	AHL25; AGF1	AT-Hook	A. thaliana		binds AT-rich DNA sequences related to the nuclear matrix attachment regions (MARs); negative regulation of gibberellic acid mediated signaling pathway http://www.uniprot.org/citations/17277098
ATATT	631	-	0.94	AHL25; AGF1	AT-Hook	A. thaliana		binds AT-rich DNA sequences related to the nuclear matrix attachment regions (MARs); negative regulation of gibberellic acid mediated signaling pathway http://www.uniprot.org/citations/17277098
AATTA	1268	+	0.96	AHL25; AGF1	AT-Hook	A. thaliana		binds AT-rich DNA sequences related to the nuclear matrix attachment regions (MARs); negative regulation of gibberellic acid mediated signaling pathway http://www.uniprot.org/citations/17277098
AATAT	1263	+	0.95	AHL25; AGF1	AT-Hook	A. thaliana		binds AT-rich DNA sequences related to the nuclear matrix attachment regions (MARs); negative regulation of gibberellic acid mediated signaling pathway http://www.uniprot.org/citations/17277098
AATAA	309	-	0.96	AHL25; AGF1	AT-Hook	A. thaliana		binds AT-rich DNA sequences related to the nuclear matrix attachment regions (MARs); negative regulation of gibberellic acid mediated signaling pathway http://www.uniprot.org/citations/17277098
TTATT	475	+	1	AHL25; AGF1	AT-Hook	A. thaliana		binds AT-rich DNA sequences related to the nuclear matrix attachment regions (MARs); negative regulation of gibberellic acid mediated signaling pathway http://www.uniprot.org/citations/17277098
TATAT	701	-	0.97	AHL13 in A.thaliana	AT-Hook	many plant species		AHL13 binds AT-rich DNA sequences related to the nuclear matrix attachment regions (MARs)
TATAT	741	-	0.94	AHL13 in A.thaliana	AT-Hook	many plant species		AHL13 binds AT-rich DNA sequences related to the nuclear matrix attachment regions (MARs)
TATAT	1047	-	1	AHL13 in A.thaliana	AT-Hook	many plant species		AHL13 binds AT-rich DNA sequences related to the nuclear matrix attachment regions (MARs)
TATAT	1123	-	1	AHL13 in A.thaliana	AT-Hook	many plant species		AHL13 binds AT-rich DNA sequences related to the nuclear matrix attachment regions (MARs)
ATATA	1264	+	1	AHL13 in A.thaliana	AT-Hook	many plant species		AHL13 binds AT-rich DNA sequences related to the nuclear matrix attachment regions (MARs)
ATAAT	307	+	1	AHL6 in A. thaliana	AT-Hook	many plant species		AHL6 binds AT-rich DNA sequences related to the nuclear matrix attachment regions (MARs)
ATAAT	1263	+	1	AHL6 in A. thaliana	AT-Hook	many plant species		AHL6 binds AT-rich DNA sequences related to the nuclear matrix attachment regions (MARs)
AATAA	306	+	1	AHL6 in A. thaliana	AT-Hook	many plant species		AHL6 binds AT-rich DNA sequences related to the nuclear matrix attachment regions (MARs)
TTATT	479	-	1	AHL6 in A. thaliana	AT-Hook	many plant species		AHL6 binds AT-rich DNA sequences related to the nuclear matrix attachment regions (MARs)
TTATT	673	-	1	AHL6 in A. thaliana	AT-Hook	many plant species		AHL6 binds AT-rich DNA sequences related to the nuclear matrix attachment regions (MARs)
TTTTT	61	-	0.98	AHL6 in A. thaliana	AT-Hook	many plant species		AHL6 binds AT-rich DNA sequences related to the nuclear matrix attachment regions (MARs)
TTTTT	320	-	0.97	AHL6 in A. thaliana	AT-Hook	many plant species		AHL6 binds AT-rich DNA sequences related to the nuclear matrix attachment regions (MARs)
TTTTT	371	-	0.98	AHL6 in A. thaliana	AT-Hook	many plant species		AHL6 binds AT-rich DNA sequences related to the nuclear matrix attachment regions (MARs)
AAAAA	393	+	0.98	AHL6 in A. thaliana	AT-Hook	many plant species		AHL6 binds AT-rich DNA sequences related to the nuclear matrix attachment regions (MARs)
AAAAA	1089	+	0.97	AHL6 in A. thaliana	AT-Hook	many plant species		AHL6 binds AT-rich DNA sequences related to the nuclear matrix attachment regions (MARs)
AAAAA	1406	+	0.97	AHL6 in A. thaliana	AT-Hook	many plant species		AHL6 binds AT-rich DNA sequences related to the nuclear matrix attachment regions (MARs)
TTTAT	478	-	1	AHL6 in A. thaliana	AT-Hook	many plant species		AHL6 binds AT-rich DNA sequences related to the nuclear matrix attachment regions (MARs)
TTTAT	669	-	1	AHL6 in A. thaliana	AT-Hook	many plant species		AHL6 binds AT-rich DNA sequences related to the nuclear matrix attachment regions (MARs)
AATAT	345	+	1	AHL6 in A. thaliana	AT-Hook	many plant species		AHL6 binds AT-rich DNA sequences related to the nuclear matrix attachment regions (MARs)
AATAT	740	+	1	AHL6 in A. thaliana	AT-Hook	many plant species		AHL6 binds AT-rich DNA sequences related to the nuclear matrix attachment regions (MARs)
TATTT	478	-	1	AHL6 in A. thaliana	AT-Hook	many plant species		AHL6 binds AT-rich DNA sequences related to the nuclear matrix attachment regions (MARs)
ATTTT	314	-	1	AHL6 in A. thaliana	AT-Hook	many plant species		AHL6 binds AT-rich DNA sequences related to the nuclear matrix attachment regions (MARs)
AAAAT	343	+	1	AHL6 in A. thaliana	AT-Hook	many plant species		AHL6 binds AT-rich DNA sequences related to the nuclear matrix attachment regions (MARs)
AAAAT	853	+	1	AHL6 in A. thaliana	AT-Hook	many plant species		AHL6 binds AT-rich DNA sequences related to the nuclear matrix attachment regions (MARs)
AAAAT	1383	+	1	AHL6 in A. thaliana	AT-Hook	many plant species		AHL6 binds AT-rich DNA sequences related to the nuclear matrix attachment regions (MARs)
ATTGC	1035	-	0.97	AHL6 in A. thaliana	AT-Hook	many plant species		AHL6 binds AT-rich DNA sequences related to the nuclear matrix attachment regions (MARs)
TATTT	477	-	1	AHL6 in A. thaliana	AT-Hook	many plant species		AHL6 binds AT-rich DNA sequences related to the nuclear matrix attachment regions (MARs)
TAATA	1163	-	0.99	AHL6 in A. thaliana	AT-Hook	many plant species		AHL6 binds AT-rich DNA sequences related to the nuclear matrix attachment regions (MARs)
TATTA	1215	+	0.99	AHL6 in A. thaliana	AT-Hook	many plant species		AHL6 binds AT-rich DNA sequences related to the nuclear matrix attachment regions (MARs)
ATTAT	558	-	1	AHL6 in A. thaliana	AT-Hook	many plant species		AHL6 binds AT-rich DNA sequences related to the nuclear matrix attachment regions (MARs)
ATTAT	650	-	1	AHL6 in A. thaliana	AT-Hook	many plant species		AHL6 binds AT-rich DNA sequences related to the nuclear matrix attachment regions (MARs)
ATTAT	672	-	1	AHL6 in A. thaliana	AT-Hook	many plant species		AHL6 binds AT-rich DNA sequences related to the nuclear matrix attachment regions (MARs)
ATTAT	703	-	0.99	AHL6 in A. thaliana	AT-Hook	many plant species		AHL6 binds AT-rich DNA sequences related to the nuclear matrix attachment regions (MARs)
ATTAT	1049	-	0.99	AHL6 in A. thaliana	AT-Hook	many plant species		AHL6 binds AT-rich DNA sequences related to the nuclear matrix attachment regions (MARs)
ATTAT	1125	-	0.99	AHL6 in A. thaliana	AT-Hook	many plant species		AHL6 binds AT-rich DNA sequences related to the nuclear matrix attachment regions (MARs)
AAATA	8	+	1	AHL6 in A. thaliana	AT-Hook	many plant species		AHL6 binds AT-rich DNA sequences related to the nuclear matrix attachment regions (MARs)
AAATA	346	+	0.93	AHL6 in A. thaliana	AT-Hook	many plant species		AHL6 binds AT-rich DNA sequences related to the nuclear matrix attachment regions (MARs)
AAATA	632	+	0.93	AHL6 in A. thaliana	AT-Hook	many plant species		AHL6 binds AT-rich DNA sequences related to the nuclear matrix attachment regions (MARs)
TATTT	558	-	1	AHL6 in A. thaliana	AT-Hook	many plant species		AHL6 binds AT-rich DNA sequences related to the nuclear matrix attachment regions (MARs)
TATTT	672	-	1	AHL6 in A. thaliana	AT-Hook	many plant species		AHL6 binds AT-rich DNA sequences related to the nuclear matrix attachment regions (MARs)
AATTT	313	-	1	HMGA in A. thaliana	AT-Hook	many plant species
AATTT	1117	-	1	HMGA in A. thaliana	AT-Hook	many plant species
AAATT	853	+	1	HMGA in A. thaliana	AT-Hook	many plant species
AAATT	1093	+	1	HMGA in A. thaliana	AT-Hook	many plant species
AAATT	1383	+	1	HMGA in A. thaliana	AT-Hook	many plant species
TACGT	44	+	0.9	NAC055 NAC3, At3g15500	NAC; NAM	A. thaliana	Strongly induced by high salinity. Slightly up-regulated by drought, abscisic acid (ABA) and jasmonic acid. Not induced by cold treatment. PMID:15319476
TACGT	718	+	0.94	NAC055 NAC3, At3g15500	NAC; NAM	A. thaliana	Strongly induced by high salinity. Slightly up-regulated by drought, abscisic acid (ABA) and jasmonic acid. Not induced by cold treatment. PMID:15319476
ACGTA	44	-	0.9	NAC055 NAC3, At3g15500	NAC; NAM	A. thaliana	Strongly induced by high salinity. Slightly up-regulated by drought, abscisic acid (ABA) and jasmonic acid. Not induced by cold treatment. PMID:15319476
ACGTA	718	-	0.92	NAC055 NAC3, At3g15500	NAC; NAM	A. thaliana	Strongly induced by high salinity. Slightly up-regulated by drought, abscisic acid (ABA) and jasmonic acid. Not induced by cold treatment. PMID:15319476
ACGTA	720	-	0.98	NAC055 NAC3, At3g15500	NAC; NAM	A. thaliana	Strongly induced by high salinity. Slightly up-regulated by drought, abscisic acid (ABA) and jasmonic acid. Not induced by cold treatment. PMID:15319476
CGTA	720	-	0.98	NAC055 NAC3, At3g15500	NAC; NAM	A. thaliana	Strongly induced by high salinity. Slightly up-regulated by drought, abscisic acid (ABA) and jasmonic acid. Not induced by cold treatment. PMID:15319476
TTGAC	829	-	1	NAC055 NAC3, At3g15500	NAC; NAM	A. thaliana	Strongly induced by high salinity. Slightly up-regulated by drought, abscisic acid (ABA) and jasmonic acid. Not induced by cold treatment. PMID:15319476
ACAT	644	-	1	NAC055 NAC3, At3g15500	NAC; NAM	A. thaliana	Strongly induced by high salinity. Slightly up-regulated by drought, abscisic acid (ABA) and jasmonic acid. Not induced by cold treatment. PMID:15319476
CGTA	720	-	0.98	NAC002 ATAF1, At1g01720	NAC; NAM	A. thaliana	response to wounding, 11516145	negative regulation of abscisic acid-activated signaling pathway PMID:18694460
TTGAC	829	-	1	NAC002 ATAF1, At1g01720	NAC; NAM	A. thaliana	response to wounding, 11516145	negative regulation of abscisic acid-activated signaling pathway PMID:18694460
CGTA	720	-	0.98	NAC018 NAM, NARS2, At1g52880	NAC; NAM	A. thaliana		involved in the elaboration of shoot apical meristems (SAM) (Probable). Together with NAC056/NARS1, regulates embryogenesis by regulating the development and degeneration of ovule integuments, a process required for intertissue communication between the embryo and the maternal integument (PubMed:18849494)
TTGAC	829	-	1	NAC018 NAM, NARS2, At1g52880	NAC; NAM	A. thaliana		involved in the elaboration of shoot apical meristems (SAM) (Probable). Together with NAC056/NARS1, regulates embryogenesis by regulating the development and degeneration of ovule integuments, a process required for intertissue communication between the embryo and the maternal integument (PubMed:18849494)
CGTA	720	-	0.98	NAC019 ANAC, At1g52890	NAC; NAM	A. thaliana	Induced by drought, high salinity and abscisic acid (ABA). Slightly up-regulated by jasmonic acid. Not induced by cold treatment. 15319476
TTGAC	829	-	1	NAC019 ANAC, At1g52890	NAC; NAM	A. thaliana	Induced by drought, high salinity and abscisic acid (ABA). Slightly up-regulated by jasmonic acid. Not induced by cold treatment. 15319476
ACAT	644	-	1	NAC019 ANAC, At1g52890	NAC; NAM	A. thaliana	Induced by drought, high salinity and abscisic acid (ABA). Slightly up-regulated by jasmonic acid. Not induced by cold treatment. 15319476
CGTA	720	-	0.98	NAC025 ANAC025, NAC25, TAPNAC, At1g61110	NAC; NAM	A. thaliana		May be associated with anther development and pollen production (Probable). Required for normal seed development and morphology (PubMed:18849494).
CGTA	720	-	0.98	NAC032 NAC32, At1g77450	NAC; NAM	A. thaliana	Induced by abscisic acid (ABA) (PubMed:26518251). Induced by salinity and osmotic stress, and during leaf senescence (PubMed:27388337).	Transcriptional activator that positively regulates age-dependent senescence, dark-induced leaf senescence and stress-induced senescence. Regulates leaf senescence through the modulation of the expression of senescence-associated genes SGR1/NYE1, SAG113 and SAUR36/SAG201, which are involved in chlorophyll degradation, and abscisic acid (ABA) and auxin promotion of senescence, respectively. Promot…
CGTA	720	-	0.98	NAC047 NAC47, SHYG, At3g04070	NAC; NAM	A. thaliana	Induction by root flooding (PubMed:24363315). Induced by senescence (PubMed:24659488)	Transcription factor that binds to the promoter of ACO5, an ACC oxidase involved in ethylene biosyhthesis. Mediates waterlogging-induced hyponastic leaf movement, and cell expansion in abaxial cells of the basal petiole region, by directly regulating the expression of ACO5 (PubMed:24363315). Required for normal seed development and morphology (PubMed:18849494).
TTGAC	829	-	1	NAC047 NAC47, SHYG, At3g04070	NAC; NAM	A. thaliana	Induction by root flooding (PubMed:24363315). Induced by senescence (PubMed:24659488)	Transcription factor that binds to the promoter of ACO5, an ACC oxidase involved in ethylene biosyhthesis. Mediates waterlogging-induced hyponastic leaf movement, and cell expansion in abaxial cells of the basal petiole region, by directly regulating the expression of ACO5 (PubMed:24363315). Required for normal seed development and morphology (PubMed:18849494).
CGTA	720	-	0.98	NAC056 ANAC056, NAC2, NARS1, At3g15510	NAC; NAM	A. thaliana	Induction by jasmonic acid (JA). PMID:16805732	Together with NAC018/NARS2, regulates embryogenesis by regulating the development and degeneration of ovule integuments, a process required for intertissue communication between the embryo and the maternal integument (PubMed:18849494).
TTGAC	829	-	1	NAC056 ANAC056, NAC2, NARS1, At3g15510	NAC; NAM	A. thaliana	Induction by jasmonic acid (JA). PMID:16805732	Together with NAC018/NARS2, regulates embryogenesis by regulating the development and degeneration of ovule integuments, a process required for intertissue communication between the embryo and the maternal integument (PubMed:18849494).
CGTA	720	-	0.98	NAC072 RD26, At4g27410	NAC; NAM	A. thaliana	Strongly induced by drought, high salinity and abscisic acid (ABA). Slightly up-regulated by cold treatment. Not induced by jasmonic acid. PMID:15319476, Plant Cell Physiol. 33:217-224(1992)
TTGAC	829	-	1	NAC072 RD26, At4g27410	NAC; NAM	A. thaliana	Strongly induced by drought, high salinity and abscisic acid (ABA). Slightly up-regulated by cold treatment. Not induced by jasmonic acid. PMID:15319476, Plant Cell Physiol. 33:217-224(1992)
ACAT	644	-	1	NAC072 RD26, At4g27410	NAC; NAM	A. thaliana	Strongly induced by drought, high salinity and abscisic acid (ABA). Slightly up-regulated by cold treatment. Not induced by jasmonic acid. PMID:15319476, Plant Cell Physiol. 33:217-224(1992)
CGTA	720	-	0.98	NAC081 ATAF2, At5g08790	NAC; NAM	A. thaliana	Induced by wounding, salicylic acid (SA), methyl jasmonate, drought stress, dark and sucrose starvation (PubMed:16115070). Induced by chitin elicitor (chitooctaose) (PubMed:17722694). Induced by salicylic acid and infection with tobamovirus (TMV) (PubMed:19625399). By indole-3-acetonitrile, salicylic acid (SA), sodium nitroprusside (SNP), salt stress and drought stress (PubMed:22965747). Down-reg…	Involved in disease resistance response (PubMed:16115070, PubMed:19625399). May function as repressor of pathogenesis-related proteins (PubMed:16115070). May function in the regulation of host basal defense responses against viral infection (PubMed:19625399). Acts as suppressor of the brassinosteroid (BR)-inactivating enzymes CYP734A1/BAS1 and CYP72C1/SOB7, and prevents their expression in almost…
CGTA	720	-	0.98	NAC102, At5g63790	NAC; NAM	A. thaliana	Induced by low-oxygen stress. PMID: 19176720	May be involved in regulation of seed germination under flooding. PMID:19176720
TTGAC	829	-	1	NAC029 ANAC029, NAC29, NAP, At1g69490	NAC; NAM	A. thaliana	Induced by senescence (PubMed:22184656, PubMed:24659488, PubMed:25516602). Induced by abscisic acid (ABA) (PubMed:22184656, PubMed:25516602). Induced by ethylene (PubMed:25516602).	binds to, and transactivates the promoter of the abscisic aldehyde oxidase AAO3. Promotes chlorophyll degradation in leaves by enhancing transcription of AAO3, which leads to increased levels of the senescence-inducing hormone abscisic acid (ABA) (PubMed:25516602). Involved in the control of dehydration in senescing leaves. May function in the transition between active cell division and cell expa…
TACGT	718	-	0.92	NAC007 EMB2749, VND4, At1g12260	NAC; NAM	A. thaliana	Up-regulated during xylem vessel element formation.	binds to the secondary wall NAC binding element (SNBE) in the promoter of target genes. Involved in xylem formation by promoting the expression of secondary wall-associated transcription factors and of genes involved in secondary wall biosynthesis and programmed cell death, genes driven by the secondary wall NAC binding element (SNBE). Triggers thickening of secondary walls (PubMed:16103214, PubM…
TACGT	718	-	0.92	NAC012 NST3, SND1, At1g32770	NAC; NAM	A. thaliana		Transcriptional activator of genes involved in biosynthesis of secondary walls. Together with NST1, required for the secondary cell wall thickening and lignification of sclerenchymatous fibers and secondary xylem vessels (tracheary elements). Seems to repress the secondary cell wall thickening of xylary fibers. May also regulate the secondary cell wall lignification of other tissues. Binds to and…
TACGT	718	-	0.92	NAC015 BRN1, At1g33280,	NAC; NAM	A. thaliana		Together with SMB and BRN2, regulates cellular maturation of root cap. Promotes the expression of genes involved in secondary cell walls (SCW) biosynthesis. PMID:20197506
TACGT	718	-	0.92	NAC026 VND5, At1g62700	NAC; NAM	A. thaliana	Up-regulated during xylem vessel element formation.	binds to the secondary wall NAC binding element (SNBE), 5'-(T/A)NN(C/T)(T/C/G)TNNNNNNNA(A/C)GN(A/C/T)(A/T)-3', in the promoter of target genes (By similarity). Involved in xylem formation by promoting the expression of secondary wall-associated transcription factors and of genes involved in secondary wall biosynthesis and programmed cell death, genes driven by the secondary wall NAC binding eleme…
TACGT	718	-	0.92	NAC030 VND7, At1g71930	NAC; NAM	A. thaliana	Induced by brassinosteroids (e.g. brassinolide BL), auxin (e.g. 2,4-dichlorphenoxyacetic acid 2,4-D) and cytokinin (e.g. kinetin), with a synergistic effect (PubMed:16103214, PubMed:22345435). Up-regulated in a feed-back loop by ASL20 (PubMed:19088331). Levels are monitored by proteasome-mediated degradation (PubMed:18445131). Repressed by WEE1 upon replication stress to prevent premature trachea…	ranscription activator that binds to the secondary wall NAC binding element (SNBE), 5'-(T/A)NN(C/T)(T/C/G)TNNNNNNNA(A/C)GN(A/C/T)(A/T)-3', in the promoter of target genes (e.g. genes involved in secondary wall biosynthesis, cell wall modification such as xylan accumulation, and programmed cell death) (PubMed:20935069, PubMed:20488898, PubMed:22037706, PubMed:21284754). Involved in xylem formation…
TACGT	718	-	0.92	NAC033 SMB, At1g79580	NAC; NAM	A. thaliana	Induced by FEZ in oriented-divised root cap stem cells. PMID:19081078	Together with BRN1 and BRN2, regulates cellular maturation of root cap. Represses stem cell-like divisions in the root cap daughter cells, and thus promotes daughter cell fate. Inhibits expression of its positive regulator FEZ in a feedback loop for controlled switches in cell division plane. Promotes the expression of genes involved in secondary cell walls (SCW) biosynthesis. PMID:19081078, PMID…
TACGT	718	-	0.92	NAC037 VND1, At2g18060	NAC; NAM	A. thaliana	Induced by chitin (e.g. chitooctaose) (PubMed:17722694). Accumulates in plants exposed to callus induction medium (CIM) (PubMed:17581762).	binds to the secondary wall NAC binding element (SNBE), 5'-(T/A)NN(C/T)(T/C/G)TNNNNNNNA(A/C)GN(A/C/T)(A/T)-3', in the promoter of target genes (By similarity). Involved in xylem formation by promoting the expression of secondary wall-associated transcription factors and of genes involved in secondary wall biosynthesis and programmed cell death, genes driven by the secondary wall NAC binding eleme…
TACGT	718	-	0.92	NAC043 EMB2301, NST1, At2g46770	NAC; NAM	A. thaliana		Transcription activator of genes involved in biosynthesis of secondary walls. Together with NST2 and NST3, required for the secondary cell wall thickening of sclerenchymatous fibers, secondary xylem (tracheary elements), and of the anther endocethium, which is necessary for anther dehiscence. May also regulate the secondary cell wall lignification of other tissues. PMID:16214898, PMID:17237351, P…
TACGT	718	-	0.92	NAC066 NST2, At3g61910	NAC; NAM	A. thaliana		Transcription activator of genes involved in biosynthesis of secondary walls. Together with NST1, required for the secondary cell wall thickening of the anther endocethium, which is necessary for anther dehiscence. May also regulate the secondary cell wall lignification of other tissues such as tracheary elements. PMID:16214898
TACGT	718	-	0.92	NAC070 BRN2, At4g10350	NAC; NAM	A. thaliana		Together with BRN1 and SMB, regulates cellular maturation of root cap. Promotes the expression of genes involved in secondary cell walls (SCW) biosynthesis. PMID:20197506
TACGT	718	-	0.92	NAC076 VND2, At4g36160	NAC; NAM	A. thaliana	Up-regulated during xylem vessel element formation	Transcription activator that binds to the secondary wall NAC binding element (SNBE), 5'-(T/A)NN(C/T)(T/C/G)TNNNNNNNA(A/C)GN(A/C/T)(A/T)-3', in the promoter of target genes (By similarity). Involved in xylem formation by promoting the expression of secondary wall-associated transcription factors and of genes involved in secondary wall biosynthesis and programmed cell death, genes driven by the sec…
TACGT	718	-	0.92	NAC101 VND6, At5g62380	NAC; NAM	A. thaliana	Induction by By brassinosteroids (e.g. brassinolide BL), auxin (e.g. 2,4-dichlorphenoxyacetic acid 2,4-D) and cytokinin (e.g. kinetin), with a synergistic effect (PubMed:16103214). Accumulates during infection by the soilborne fungal pathogen Verticillium longisporum, especially in tissues undergoing de novo xylem formation (PubMed:23023171).	Transcription activator that binds to the secondary wall NAC binding element (SNBE), 5'-(T/A)NN(C/T)(T/C/G)TNNNNNNNA(A/C)GN(A/C/T)(A/T)-3', and to the tracheary elements (TE) specific regulating cis-element (TERE), 5'-CTTNAAAGCNA-3', in the promoter of target genes (e.g. genes involved in secondary wall biosynthesis, cell wall modification such as xylan accumulation, and programmed cell death) (P…
TACGT	718	-	0.92	NAC105 VND3, At5g66300	NAC; NAM	A. thaliana	Up-regulated during xylem vessel element formation.	Transcription activator that binds to the secondary wall NAC binding element (SNBE), 5'-(T/A)NN(C/T)(T/C/G)TNNNNNNNA(A/C)GN(A/C/T)(A/T)-3', in the promoter of target genes (By similarity). Involved in xylem formation by promoting the expression of secondary wall-associated transcription factors and of genes involved in secondary wall biosynthesis and programmed cell death, genes driven by the sec…
AGTAA	124	-	0.78	NAC014 NTL2, At1g33060	NAC; NAM	A. thaliana	Induction by cold, heat and drought stresses. PMID:17158162
AGTAA	565	-	0.78	NAC014 NTL2, At1g33060	NAC; NAM	A. thaliana	Induction by cold, heat and drought stresses. PMID:17158162
AGTAA	124	-	0.78	NAC062 NTL6, At3g49530	NAC; NAM	A. thaliana	Induction by salt, drought stress, abscisic acid (ABA), salicylic acid (SA) and methyl methanesulfonate (MMS) treatment. PMID:17158162	Mediates induction of pathogenesis-related (PR) genes independently of salicylic signaling in response to cold. Binds directly to the PR gene promoters and enhances plant resistance to pathogen infection, incorporating cold signals into pathogen resistance responses (PubMed:19947982). Plays a regulatory role in abscisic acid (ABA)-mediated drought-resistance response (PubMed:22967043).
AGTAA	565	-	0.78	NAC062 NTL6, At3g49530	NAC; NAM	A. thaliana	Induction by salt, drought stress, abscisic acid (ABA), salicylic acid (SA) and methyl methanesulfonate (MMS) treatment. PMID:17158162	Mediates induction of pathogenesis-related (PR) genes independently of salicylic signaling in response to cold. Binds directly to the PR gene promoters and enhances plant resistance to pathogen infection, incorporating cold signals into pathogen resistance responses (PubMed:19947982). Plays a regulatory role in abscisic acid (ABA)-mediated drought-resistance response (PubMed:22967043).
AGTAA	124	-	0.78	CBNAC NTL9, At4g35580	NAC; NAM	A. thaliana	Induced during normal senescence. PMID:18443413	Calmodulin-regulated transcriptional repressor. Binds several synthetic promoters with randomly selected binding sites (PubMed:17947243). Functions synergistically with SNI1 as negative regulator of pathogen-induced PR1 expression and basal resistance to a virulent strain of P.syringae. Binds directly to the promoter of the PR1 gene (PubMed:22826500). Acts as positive regulator of innate immunity…
AGTAA	565	-	0.78	CBNAC NTL9, At4g35580	NAC; NAM	A. thaliana	Induced during normal senescence. PMID:18443413	Calmodulin-regulated transcriptional repressor. Binds several synthetic promoters with randomly selected binding sites (PubMed:17947243). Functions synergistically with SNI1 as negative regulator of pathogen-induced PR1 expression and basal resistance to a virulent strain of P.syringae. Binds directly to the promoter of the PR1 gene (PubMed:22826500). Acts as positive regulator of innate immunity…
AGTAA	124	-	0.78	NAC091 TIP, At5g24590	NAC; NAM	A. thaliana	Induced by bacterial pathogens type III effector proteins (TTEs). PMID:16553893	Transcription activator essential for the anti-viral defense called virus basal resistance response pathway (PubMed:11041886, PubMed:15629774, PubMed:18785827, PubMed:24418554). Not involved in HRT-mediated hypersensitive response (HR) and resistance to TCV (PubMed:18785827). Binds DNA non specifically (PubMed:15629774). Activated by proteolytic cleavage through regulated intramembrane proteolysi…
AGTAA	565	-	0.78	NAC091 TIP, At5g24590	NAC; NAM	A. thaliana	Induced by bacterial pathogens type III effector proteins (TTEs). PMID:16553893	Transcription activator essential for the anti-viral defense called virus basal resistance response pathway (PubMed:11041886, PubMed:15629774, PubMed:18785827, PubMed:24418554). Not involved in HRT-mediated hypersensitive response (HR) and resistance to TCV (PubMed:18785827). Binds DNA non specifically (PubMed:15629774). Activated by proteolytic cleavage through regulated intramembrane proteolysi…
ACCTA	887	-	0.92	MYB46 At5g12870	MYB	A. thaliana	Slightly induced by salicylic acid (SA). Positively regulated by SND1 and homolog proteins. PMID:16463103 , PMID:17890373.	Transcription activator. Involved in the regulation of secondary wall biosynthesis in fibers and vessels (PubMed:17890373). Transcription activator of the mannan synthase CSLA9 that recognizes and binds to the DNA consensus sequence 5'-[AG][GT]T[AT]GGT[GA]-3' cis-regulatory element of CSLA9 promoter (PubMed:24243147). Transcription factor that acts as molecular switch in the NAC012/SND1-mediated …
AACCA	152 (in tandem repeat)	+	0.97	MYB46 At5g12870	MYB	A. thaliana	Slightly induced by salicylic acid (SA). Positively regulated by SND1 and homolog proteins. PMID:16463103 , PMID:17890373.	Transcription activator. Involved in the regulation of secondary wall biosynthesis in fibers and vessels (PubMed:17890373). Transcription activator of the mannan synthase CSLA9 that recognizes and binds to the DNA consensus sequence 5'-[AG][GT]T[AT]GGT[GA]-3' cis-regulatory element of CSLA9 promoter (PubMed:24243147). Transcription factor that acts as molecular switch in the NAC012/SND1-mediated …
AACCA	526	+	0.93	MYB46 At5g12870	MYB	A. thaliana	Slightly induced by salicylic acid (SA). Positively regulated by SND1 and homolog proteins. PMID:16463103 , PMID:17890373.	Transcription activator. Involved in the regulation of secondary wall biosynthesis in fibers and vessels (PubMed:17890373). Transcription activator of the mannan synthase CSLA9 that recognizes and binds to the DNA consensus sequence 5'-[AG][GT]T[AT]GGT[GA]-3' cis-regulatory element of CSLA9 promoter (PubMed:24243147). Transcription factor that acts as molecular switch in the NAC012/SND1-mediated …
AACCA	1485	+	1	MYB46 At5g12870	MYB	A. thaliana	Slightly induced by salicylic acid (SA). Positively regulated by SND1 and homolog proteins. PMID:16463103 , PMID:17890373.	Transcription activator. Involved in the regulation of secondary wall biosynthesis in fibers and vessels (PubMed:17890373). Transcription activator of the mannan synthase CSLA9 that recognizes and binds to the DNA consensus sequence 5'-[AG][GT]T[AT]GGT[GA]-3' cis-regulatory element of CSLA9 promoter (PubMed:24243147). Transcription factor that acts as molecular switch in the NAC012/SND1-mediated …
ACCTA	886	-	0.91	MYB3 At1g22640	Myb/SANT; MYB	A. thaliana	Induced by nitrogen, salicylic acid, NaCl and abscisic acid (ABA). PMID:9839469, PMID:16463103, PMID:18541146	Involved in cell differentiation, cinnamic acid biosynthetic process (12068110), negative regulation of metabolic process (12068110)
ACCTA	886	-	0.91	MYB6 At4g09460	Myb/SANT; MYB	A. thaliana	Induced by ethylene, asbscisic acid (ABA), auxin (IAA), and Pseudomonas syringae pv. phaseolica. PMID:9839469 Response to gibberellin, response to jasmonic acid, response to salicylic acid (16463103).
ACCTA	887	-	0.92	MYB111 PFG3, At5g49330	Myb/SANT; MYB	A. thaliana	Triggered by HY5 in response to light and UV-B. PMID: 19895401	Flavonol-specific transcription activator involved in the regulation of several genes of flavonoid biosynthesis. Activates the expression of CHS, CHI, F3H and FLS1. Controls flavonol biosynthesis primarily in cotyledons and leaves (PubMed:17419845, PubMed:20731781). Confers tolerance to UV-B (PubMed:19895401).
ATATC	1165	+	0.97	RVE7L At3g10113	Myb/SANT	A. thaliana
GATAT	1216	-	0.97	RVE7L At3g10113	Myb/SANT	A. thaliana
ACCTA	886	-	0.91	MYB7 At2g16720	Myb/SANT	A. thaliana	Induced by abscisic acid (ABA) and osmotic stress (PubMed:25053018). Induced by salt stress (PubMed:24319076, PubMed:25053018).	Transcription factor involved in the negative regulation of flavonol biosynthesis. Represses the early phenylpropanoid genes, phenylalanine ammonia-lyase (PAL), cinnamate 4-hydroxylase (C4H) and 4-coumarate-CoA ligase (4CL), as well as the flavonoid-specific genes, flavonoid 3'-hydroxylase (F3'H) and dihydroflavonol 4-reductase (DFR) (PubMed:24319076). Plays a role in seed germination inhibition.…
TATCT	158 (in tandem repeat)	+	0.94	ARR18 At5g58080	Myb/SANT ;ARR-B	A. thaliana		Functions as a response regulator involved in His-to-Asp phosphorelay signal transduction system. Phosphorylation of the Asp residue in the receiver domain activates the ability of the protein to promote the transcription of target genes. Could directly activate some type-A response regulators in response to cytokinins (By similarity).
AATCT	15	-	1	ARR18 At5g58080	Myb/SANT ;ARR-B	A. thaliana		Functions as a response regulator involved in His-to-Asp phosphorelay signal transduction system. Phosphorylation of the Asp residue in the receiver domain activates the ability of the protein to promote the transcription of target genes. Could directly activate some type-A response regulators in response to cytokinins (By similarity).
AATCT	197	-	1	ARR18 At5g58080	Myb/SANT ;ARR-B	A. thaliana		Functions as a response regulator involved in His-to-Asp phosphorelay signal transduction system. Phosphorylation of the Asp residue in the receiver domain activates the ability of the protein to promote the transcription of target genes. Could directly activate some type-A response regulators in response to cytokinins (By similarity).
AATCT	919	-	1	ARR18 At5g58080	Myb/SANT ;ARR-B	A. thaliana		Functions as a response regulator involved in His-to-Asp phosphorelay signal transduction system. Phosphorylation of the Asp residue in the receiver domain activates the ability of the protein to promote the transcription of target genes. Could directly activate some type-A response regulators in response to cytokinins (By similarity).
AATCC	179	-	1	ARR18 At5g58080	Myb/SANT ;ARR-B	A. thaliana		Functions as a response regulator involved in His-to-Asp phosphorelay signal transduction system. Phosphorylation of the Asp residue in the receiver domain activates the ability of the protein to promote the transcription of target genes. Could directly activate some type-A response regulators in response to cytokinins (By similarity).
AATCC	204	-	1	ARR18 At5g58080	Myb/SANT ;ARR-B	A. thaliana		Functions as a response regulator involved in His-to-Asp phosphorelay signal transduction system. Phosphorylation of the Asp residue in the receiver domain activates the ability of the protein to promote the transcription of target genes. Could directly activate some type-A response regulators in response to cytokinins (By similarity).
AATCC	548	-	1	ARR18 At5g58080	Myb/SANT ;ARR-B	A. thaliana		Functions as a response regulator involved in His-to-Asp phosphorelay signal transduction system. Phosphorylation of the Asp residue in the receiver domain activates the ability of the protein to promote the transcription of target genes. Could directly activate some type-A response regulators in response to cytokinins (By similarity).
AGATT	1405	+	1	ARR18 At5g58080	Myb/SANT ;ARR-B	A. thaliana		Functions as a response regulator involved in His-to-Asp phosphorelay signal transduction system. Phosphorylation of the Asp residue in the receiver domain activates the ability of the protein to promote the transcription of target genes. Could directly activate some type-A response regulators in response to cytokinins (By similarity).
AATCT	15	-	1	ARR1 At3g16857	Myb/SANT ;ARR-B	A. thaliana	Down-regulated by gibberellin. PMID:20605455 response to cytokinin 18502977, response to water deprivation 26884175	Transcriptional activator that binds specifically to the DNA sequence 5'-[AG]GATT-3'. Functions as a response regulator involved in His-to-Asp phosphorelay signal transduction system. Phosphorylation of the Asp residue in the receiver domain activates the ability of the protein to promote the transcription of target genes. Could directly activate some type-A response regulators in response to cyt…
AATCT	197	-	1	ARR1 At3g16857	Myb/SANT ;ARR-B	A. thaliana	Down-regulated by gibberellin. PMID:20605455 response to cytokinin 18502977, response to water deprivation 26884175	Transcriptional activator that binds specifically to the DNA sequence 5'-[AG]GATT-3'. Functions as a response regulator involved in His-to-Asp phosphorelay signal transduction system. Phosphorylation of the Asp residue in the receiver domain activates the ability of the protein to promote the transcription of target genes. Could directly activate some type-A response regulators in response to cyt…
AATCT	919	-	1	ARR1 At3g16857	Myb/SANT ;ARR-B	A. thaliana	Down-regulated by gibberellin. PMID:20605455 response to cytokinin 18502977, response to water deprivation 26884175	Transcriptional activator that binds specifically to the DNA sequence 5'-[AG]GATT-3'. Functions as a response regulator involved in His-to-Asp phosphorelay signal transduction system. Phosphorylation of the Asp residue in the receiver domain activates the ability of the protein to promote the transcription of target genes. Could directly activate some type-A response regulators in response to cyt…
AATCC	179	-	1	ARR1 At3g16857	Myb/SANT ;ARR-B	A. thaliana	Down-regulated by gibberellin. PMID:20605455 response to cytokinin 18502977, response to water deprivation 26884175	Transcriptional activator that binds specifically to the DNA sequence 5'-[AG]GATT-3'. Functions as a response regulator involved in His-to-Asp phosphorelay signal transduction system. Phosphorylation of the Asp residue in the receiver domain activates the ability of the protein to promote the transcription of target genes. Could directly activate some type-A response regulators in response to cyt…
AATCC	204	-	1	ARR1 At3g16857	Myb/SANT ;ARR-B	A. thaliana	Down-regulated by gibberellin. PMID:20605455 response to cytokinin 18502977, response to water deprivation 26884175	Transcriptional activator that binds specifically to the DNA sequence 5'-[AG]GATT-3'. Functions as a response regulator involved in His-to-Asp phosphorelay signal transduction system. Phosphorylation of the Asp residue in the receiver domain activates the ability of the protein to promote the transcription of target genes. Could directly activate some type-A response regulators in response to cyt…
AATCC	548	-	1	ARR1 At3g16857	Myb/SANT ;ARR-B	A. thaliana	Down-regulated by gibberellin. PMID:20605455 response to cytokinin 18502977, response to water deprivation 26884175	Transcriptional activator that binds specifically to the DNA sequence 5'-[AG]GATT-3'. Functions as a response regulator involved in His-to-Asp phosphorelay signal transduction system. Phosphorylation of the Asp residue in the receiver domain activates the ability of the protein to promote the transcription of target genes. Could directly activate some type-A response regulators in response to cyt…
AGATT	1405	+	1	ARR1 At3g16857	Myb/SANT ;ARR-B	A. thaliana	Down-regulated by gibberellin. PMID:20605455 response to cytokinin 18502977, response to water deprivation 26884175	Transcriptional activator that binds specifically to the DNA sequence 5'-[AG]GATT-3'. Functions as a response regulator involved in His-to-Asp phosphorelay signal transduction system. Phosphorylation of the Asp residue in the receiver domain activates the ability of the protein to promote the transcription of target genes. Could directly activate some type-A response regulators in response to cyt…
AATCT	15	-	1	ARR2 ARP5, At4g16110	Myb/SANT ;ARR-B	A. thaliana	response to cytokinin 16227453, response to ethylene 15282545	Transcriptional activator that binds specifically to the DNA sequence 5'-[AG]GATT-3'. Functions as a response regulator involved in His-to-Asp phosphorelay signal transduction system. Phosphorylation of the Asp residue in the receiver domain activates the ability of the protein to promote the transcription of target genes. Could directly activate some type-A response regulators in response to cyt…
AATCT	197	-	1	ARR2 ARP5, At4g16110	Myb/SANT ;ARR-B	A. thaliana	response to cytokinin 16227453, response to ethylene 15282545	Transcriptional activator that binds specifically to the DNA sequence 5'-[AG]GATT-3'. Functions as a response regulator involved in His-to-Asp phosphorelay signal transduction system. Phosphorylation of the Asp residue in the receiver domain activates the ability of the protein to promote the transcription of target genes. Could directly activate some type-A response regulators in response to cyt…
AATCT	919	-	1	ARR2 ARP5, At4g16110	Myb/SANT ;ARR-B	A. thaliana	response to cytokinin 16227453, response to ethylene 15282545	Transcriptional activator that binds specifically to the DNA sequence 5'-[AG]GATT-3'. Functions as a response regulator involved in His-to-Asp phosphorelay signal transduction system. Phosphorylation of the Asp residue in the receiver domain activates the ability of the protein to promote the transcription of target genes. Could directly activate some type-A response regulators in response to cyt…
AATCC	179	-	1	ARR2 ARP5, At4g16110	Myb/SANT ;ARR-B	A. thaliana	response to cytokinin 16227453, response to ethylene 15282545	Transcriptional activator that binds specifically to the DNA sequence 5'-[AG]GATT-3'. Functions as a response regulator involved in His-to-Asp phosphorelay signal transduction system. Phosphorylation of the Asp residue in the receiver domain activates the ability of the protein to promote the transcription of target genes. Could directly activate some type-A response regulators in response to cyt…
AATCC	204	-	1	ARR2 ARP5, At4g16110	Myb/SANT ;ARR-B	A. thaliana	response to cytokinin 16227453, response to ethylene 15282545	Transcriptional activator that binds specifically to the DNA sequence 5'-[AG]GATT-3'. Functions as a response regulator involved in His-to-Asp phosphorelay signal transduction system. Phosphorylation of the Asp residue in the receiver domain activates the ability of the protein to promote the transcription of target genes. Could directly activate some type-A response regulators in response to cyt…
AATCC	548	-	1	ARR2 ARP5, At4g16110	Myb/SANT ;ARR-B	A. thaliana	response to cytokinin 16227453, response to ethylene 15282545	Transcriptional activator that binds specifically to the DNA sequence 5'-[AG]GATT-3'. Functions as a response regulator involved in His-to-Asp phosphorelay signal transduction system. Phosphorylation of the Asp residue in the receiver domain activates the ability of the protein to promote the transcription of target genes. Could directly activate some type-A response regulators in response to cyt…
AGATT	1405	+	1	ARR2 ARP5, At4g16110	Myb/SANT ;ARR-B	A. thaliana	response to cytokinin 16227453, response to ethylene 15282545	Transcriptional activator that binds specifically to the DNA sequence 5'-[AG]GATT-3'. Functions as a response regulator involved in His-to-Asp phosphorelay signal transduction system. Phosphorylation of the Asp residue in the receiver domain activates the ability of the protein to promote the transcription of target genes. Could directly activate some type-A response regulators in response to cyt…
AATCT	15	-	1	APRR2 TOC2, At4g18020	Myb/SANT ;ARR-B	A. thaliana
AATCT	197	-	1	APRR2 TOC2, At4g18020	Myb/SANT ;ARR-B	A. thaliana
AATCT	919	-	1	APRR2 TOC2, At4g18020	Myb/SANT ;ARR-B	A. thaliana
AATCC	179	-	1	APRR2 TOC2, At4g18020	Myb/SANT ;ARR-B	A. thaliana
AATCC	204	-	1	APRR2 TOC2, At4g18020	Myb/SANT ;ARR-B	A. thaliana
AATCC	548	-	1	APRR2 TOC2, At4g18020	Myb/SANT ;ARR-B	A. thaliana
AGATT	1405	+	1	APRR2 TOC2, At4g18020	Myb/SANT ;ARR-B	A. thaliana
AATCT	15	-	1	ARR10 ARP4, At4g31920	Myb/SANT ;ARR-B	A. thaliana	cellular response to cytokinin stimulus 23482873, 18723577, response to water deprivation 26884175,	Transcriptional activator that binds specifically to the DNA sequence 5'-[AG]GATT-3'. Functions as a response regulator involved in His-to-Asp phosphorelay signal transduction system. Phosphorylation of the Asp residue in the receiver domain activates the ability of the protein to promote the transcription of target genes. Could directly activate some type-A response regulators in response to cyt…
AATCT	197	-	1	ARR10 ARP4, At4g31920	Myb/SANT ;ARR-B	A. thaliana	cellular response to cytokinin stimulus 23482873, 18723577, response to water deprivation 26884175,	Transcriptional activator that binds specifically to the DNA sequence 5'-[AG]GATT-3'. Functions as a response regulator involved in His-to-Asp phosphorelay signal transduction system. Phosphorylation of the Asp residue in the receiver domain activates the ability of the protein to promote the transcription of target genes. Could directly activate some type-A response regulators in response to cyt…
AATCT	919	-	1	ARR10 ARP4, At4g31920	Myb/SANT ;ARR-B	A. thaliana	cellular response to cytokinin stimulus 23482873, 18723577, response to water deprivation 26884175,	Transcriptional activator that binds specifically to the DNA sequence 5'-[AG]GATT-3'. Functions as a response regulator involved in His-to-Asp phosphorelay signal transduction system. Phosphorylation of the Asp residue in the receiver domain activates the ability of the protein to promote the transcription of target genes. Could directly activate some type-A response regulators in response to cyt…
AATCC	179	-	1	ARR10 ARP4, At4g31920	Myb/SANT ;ARR-B	A. thaliana	cellular response to cytokinin stimulus 23482873, 18723577, response to water deprivation 26884175,	Transcriptional activator that binds specifically to the DNA sequence 5'-[AG]GATT-3'. Functions as a response regulator involved in His-to-Asp phosphorelay signal transduction system. Phosphorylation of the Asp residue in the receiver domain activates the ability of the protein to promote the transcription of target genes. Could directly activate some type-A response regulators in response to cyt…
AATCC	204	-	1	ARR10 ARP4, At4g31920	Myb/SANT ;ARR-B	A. thaliana	cellular response to cytokinin stimulus 23482873, 18723577, response to water deprivation 26884175,	Transcriptional activator that binds specifically to the DNA sequence 5'-[AG]GATT-3'. Functions as a response regulator involved in His-to-Asp phosphorelay signal transduction system. Phosphorylation of the Asp residue in the receiver domain activates the ability of the protein to promote the transcription of target genes. Could directly activate some type-A response regulators in response to cyt…
AATCC	548	-	1	ARR10 ARP4, At4g31920	Myb/SANT ;ARR-B	A. thaliana	cellular response to cytokinin stimulus 23482873, 18723577, response to water deprivation 26884175,	Transcriptional activator that binds specifically to the DNA sequence 5'-[AG]GATT-3'. Functions as a response regulator involved in His-to-Asp phosphorelay signal transduction system. Phosphorylation of the Asp residue in the receiver domain activates the ability of the protein to promote the transcription of target genes. Could directly activate some type-A response regulators in response to cyt…
AGATT	1405	+	1	ARR10 ARP4, At4g31920	Myb/SANT ;ARR-B	A. thaliana	cellular response to cytokinin stimulus 23482873, 18723577, response to water deprivation 26884175,	Transcriptional activator that binds specifically to the DNA sequence 5'-[AG]GATT-3'. Functions as a response regulator involved in His-to-Asp phosphorelay signal transduction system. Phosphorylation of the Asp residue in the receiver domain activates the ability of the protein to promote the transcription of target genes. Could directly activate some type-A response regulators in response to cyt…
AATCT	15	-	1	ARR14 At2g01760	Myb/SANT; MYB; ARR-B	A. thaliana		Transcriptional activator that binds specifically to the DNA sequence 5'-[AG]GATT-3'. Functions as a response regulator involved in His-to-Asp phosphorelay signal transduction system. Phosphorylation of the Asp residue in the receiver domain activates the ability of the protein to promote the transcription of target genes. Could directly activate some type-A response regulators in response to cyt…
AATCT	197	-	1	ARR14 At2g01760	Myb/SANT; MYB; ARR-B	A. thaliana		Transcriptional activator that binds specifically to the DNA sequence 5'-[AG]GATT-3'. Functions as a response regulator involved in His-to-Asp phosphorelay signal transduction system. Phosphorylation of the Asp residue in the receiver domain activates the ability of the protein to promote the transcription of target genes. Could directly activate some type-A response regulators in response to cyt…
AATCT	919	-	1	ARR14 At2g01760	Myb/SANT; MYB; ARR-B	A. thaliana		Transcriptional activator that binds specifically to the DNA sequence 5'-[AG]GATT-3'. Functions as a response regulator involved in His-to-Asp phosphorelay signal transduction system. Phosphorylation of the Asp residue in the receiver domain activates the ability of the protein to promote the transcription of target genes. Could directly activate some type-A response regulators in response to cyt…
AATCC	179	-	1	ARR14 At2g01760	Myb/SANT; MYB; ARR-B	A. thaliana		Transcriptional activator that binds specifically to the DNA sequence 5'-[AG]GATT-3'. Functions as a response regulator involved in His-to-Asp phosphorelay signal transduction system. Phosphorylation of the Asp residue in the receiver domain activates the ability of the protein to promote the transcription of target genes. Could directly activate some type-A response regulators in response to cyt…
AATCC	204	-	1	ARR14 At2g01760	Myb/SANT; MYB; ARR-B	A. thaliana		Transcriptional activator that binds specifically to the DNA sequence 5'-[AG]GATT-3'. Functions as a response regulator involved in His-to-Asp phosphorelay signal transduction system. Phosphorylation of the Asp residue in the receiver domain activates the ability of the protein to promote the transcription of target genes. Could directly activate some type-A response regulators in response to cyt…
AATCC	548	-	1	ARR14 At2g01760	Myb/SANT; MYB; ARR-B	A. thaliana		Transcriptional activator that binds specifically to the DNA sequence 5'-[AG]GATT-3'. Functions as a response regulator involved in His-to-Asp phosphorelay signal transduction system. Phosphorylation of the Asp residue in the receiver domain activates the ability of the protein to promote the transcription of target genes. Could directly activate some type-A response regulators in response to cyt…
AGATT	1405	+	1	ARR14 At2g01760	Myb/SANT; MYB; ARR-B	A. thaliana		Transcriptional activator that binds specifically to the DNA sequence 5'-[AG]GATT-3'. Functions as a response regulator involved in His-to-Asp phosphorelay signal transduction system. Phosphorylation of the Asp residue in the receiver domain activates the ability of the protein to promote the transcription of target genes. Could directly activate some type-A response regulators in response to cyt…
AATCT	15	-	1	ARR11 ARP3, At1g67710	MYB; ARR-B	A. thaliana	response to cytokinin 16227453	Transcriptional activator that binds specifically to the DNA sequence 5'-[AG]GATT-3'. Functions as a response regulator involved in His-to-Asp phosphorelay signal transduction system. Phosphorylation of the Asp residue in the receiver domain activates the ability of the protein to promote the transcription of target genes. Could directly activate some type-A response regulators in response to cyt…
AATCT	197	-	1	ARR11 ARP3, At1g67710	MYB; ARR-B	A. thaliana	response to cytokinin 16227453	Transcriptional activator that binds specifically to the DNA sequence 5'-[AG]GATT-3'. Functions as a response regulator involved in His-to-Asp phosphorelay signal transduction system. Phosphorylation of the Asp residue in the receiver domain activates the ability of the protein to promote the transcription of target genes. Could directly activate some type-A response regulators in response to cyt…
AATCT	919	-	1	ARR11 ARP3, At1g67710	MYB; ARR-B	A. thaliana	response to cytokinin 16227453	Transcriptional activator that binds specifically to the DNA sequence 5'-[AG]GATT-3'. Functions as a response regulator involved in His-to-Asp phosphorelay signal transduction system. Phosphorylation of the Asp residue in the receiver domain activates the ability of the protein to promote the transcription of target genes. Could directly activate some type-A response regulators in response to cyt…
AATCC	179	-	1	ARR11 ARP3, At1g67710	MYB; ARR-B	A. thaliana	response to cytokinin 16227453	Transcriptional activator that binds specifically to the DNA sequence 5'-[AG]GATT-3'. Functions as a response regulator involved in His-to-Asp phosphorelay signal transduction system. Phosphorylation of the Asp residue in the receiver domain activates the ability of the protein to promote the transcription of target genes. Could directly activate some type-A response regulators in response to cyt…
AATCC	204	-	1	ARR11 ARP3, At1g67710	MYB; ARR-B	A. thaliana	response to cytokinin 16227453	Transcriptional activator that binds specifically to the DNA sequence 5'-[AG]GATT-3'. Functions as a response regulator involved in His-to-Asp phosphorelay signal transduction system. Phosphorylation of the Asp residue in the receiver domain activates the ability of the protein to promote the transcription of target genes. Could directly activate some type-A response regulators in response to cyt…
AATCC	548	-	1	ARR11 ARP3, At1g67710	MYB; ARR-B	A. thaliana	response to cytokinin 16227453	Transcriptional activator that binds specifically to the DNA sequence 5'-[AG]GATT-3'. Functions as a response regulator involved in His-to-Asp phosphorelay signal transduction system. Phosphorylation of the Asp residue in the receiver domain activates the ability of the protein to promote the transcription of target genes. Could directly activate some type-A response regulators in response to cyt…
AGATT	1405	+	1	ARR11 ARP3, At1g67710	MYB; ARR-B	A. thaliana	response to cytokinin 16227453	Transcriptional activator that binds specifically to the DNA sequence 5'-[AG]GATT-3'. Functions as a response regulator involved in His-to-Asp phosphorelay signal transduction system. Phosphorylation of the Asp residue in the receiver domain activates the ability of the protein to promote the transcription of target genes. Could directly activate some type-A response regulators in response to cyt…
AATCT	15	-	1	putative ARR19 At1g49190	ARR-B	A. thaliana		Putative transcriptional activator that binds specifically to the DNA sequence 5'-[AG]GATT-3'. Functions as response regulator involved in His-to-Asp phosphorelay signal transduction system. Phosphorylation of the Asp residue in the receiver domain activates the ability of the protein to promote the transcription of target genes. Could directly activate some type-A response regulators in response…
AATCT	197	-	1	putative ARR19 At1g49190	ARR-B	A. thaliana		Putative transcriptional activator that binds specifically to the DNA sequence 5'-[AG]GATT-3'. Functions as response regulator involved in His-to-Asp phosphorelay signal transduction system. Phosphorylation of the Asp residue in the receiver domain activates the ability of the protein to promote the transcription of target genes. Could directly activate some type-A response regulators in response…
AATCT	919	-	1	putative ARR19 At1g49190	ARR-B	A. thaliana		Putative transcriptional activator that binds specifically to the DNA sequence 5'-[AG]GATT-3'. Functions as response regulator involved in His-to-Asp phosphorelay signal transduction system. Phosphorylation of the Asp residue in the receiver domain activates the ability of the protein to promote the transcription of target genes. Could directly activate some type-A response regulators in response…
AATCC	179	-	1	putative ARR19 At1g49190	ARR-B	A. thaliana		Putative transcriptional activator that binds specifically to the DNA sequence 5'-[AG]GATT-3'. Functions as response regulator involved in His-to-Asp phosphorelay signal transduction system. Phosphorylation of the Asp residue in the receiver domain activates the ability of the protein to promote the transcription of target genes. Could directly activate some type-A response regulators in response…
AATCC	204	-	1	putative ARR19 At1g49190	ARR-B	A. thaliana		Putative transcriptional activator that binds specifically to the DNA sequence 5'-[AG]GATT-3'. Functions as response regulator involved in His-to-Asp phosphorelay signal transduction system. Phosphorylation of the Asp residue in the receiver domain activates the ability of the protein to promote the transcription of target genes. Could directly activate some type-A response regulators in response…
AATCC	548	-	1	putative ARR19 At1g49190	ARR-B	A. thaliana		Putative transcriptional activator that binds specifically to the DNA sequence 5'-[AG]GATT-3'. Functions as response regulator involved in His-to-Asp phosphorelay signal transduction system. Phosphorylation of the Asp residue in the receiver domain activates the ability of the protein to promote the transcription of target genes. Could directly activate some type-A response regulators in response…
AGATT	1405	+	1	putative ARR19 At1g49190	ARR-B	A. thaliana		Putative transcriptional activator that binds specifically to the DNA sequence 5'-[AG]GATT-3'. Functions as response regulator involved in His-to-Asp phosphorelay signal transduction system. Phosphorylation of the Asp residue in the receiver domain activates the ability of the protein to promote the transcription of target genes. Could directly activate some type-A response regulators in response…
AATCT	15	-	1	ARR12 At2g25180	ARR-B	A. thaliana	response to cytokinin 18723577 16227453, response to water deprivation 26884175	Transcriptional activator that binds specifically to the DNA sequence 5'-[AG]GATT-3'. Functions as a response regulator involved in His-to-Asp phosphorelay signal transduction system. Phosphorylation of the Asp residue in the receiver domain activates the ability of the protein to promote the transcription of target genes. Could directly activate some type-A response regulators in response to cyt…
AATCT	197	-	1	ARR12 At2g25180	ARR-B	A. thaliana	response to cytokinin 18723577 16227453, response to water deprivation 26884175	Transcriptional activator that binds specifically to the DNA sequence 5'-[AG]GATT-3'. Functions as a response regulator involved in His-to-Asp phosphorelay signal transduction system. Phosphorylation of the Asp residue in the receiver domain activates the ability of the protein to promote the transcription of target genes. Could directly activate some type-A response regulators in response to cyt…
AATCT	919	-	1	ARR12 At2g25180	ARR-B	A. thaliana	response to cytokinin 18723577 16227453, response to water deprivation 26884175	Transcriptional activator that binds specifically to the DNA sequence 5'-[AG]GATT-3'. Functions as a response regulator involved in His-to-Asp phosphorelay signal transduction system. Phosphorylation of the Asp residue in the receiver domain activates the ability of the protein to promote the transcription of target genes. Could directly activate some type-A response regulators in response to cyt…
AATCC	179	-	1	ARR12 At2g25180	ARR-B	A. thaliana	response to cytokinin 18723577 16227453, response to water deprivation 26884175	Transcriptional activator that binds specifically to the DNA sequence 5'-[AG]GATT-3'. Functions as a response regulator involved in His-to-Asp phosphorelay signal transduction system. Phosphorylation of the Asp residue in the receiver domain activates the ability of the protein to promote the transcription of target genes. Could directly activate some type-A response regulators in response to cyt…
AATCC	204	-	1	ARR12 At2g25180	ARR-B	A. thaliana	response to cytokinin 18723577 16227453, response to water deprivation 26884175	Transcriptional activator that binds specifically to the DNA sequence 5'-[AG]GATT-3'. Functions as a response regulator involved in His-to-Asp phosphorelay signal transduction system. Phosphorylation of the Asp residue in the receiver domain activates the ability of the protein to promote the transcription of target genes. Could directly activate some type-A response regulators in response to cyt…
AATCC	548	-	1	ARR12 At2g25180	ARR-B	A. thaliana	response to cytokinin 18723577 16227453, response to water deprivation 26884175	Transcriptional activator that binds specifically to the DNA sequence 5'-[AG]GATT-3'. Functions as a response regulator involved in His-to-Asp phosphorelay signal transduction system. Phosphorylation of the Asp residue in the receiver domain activates the ability of the protein to promote the transcription of target genes. Could directly activate some type-A response regulators in response to cyt…
AGATT	1405	+	1	ARR12 At2g25180	ARR-B	A. thaliana	response to cytokinin 18723577 16227453, response to water deprivation 26884175	Transcriptional activator that binds specifically to the DNA sequence 5'-[AG]GATT-3'. Functions as a response regulator involved in His-to-Asp phosphorelay signal transduction system. Phosphorylation of the Asp residue in the receiver domain activates the ability of the protein to promote the transcription of target genes. Could directly activate some type-A response regulators in response to cyt…
AATCT	15	-	1	putative APRR4 At5g49240	ARR-B	A. thaliana
AATCT	197	-	1	putative APRR4 At5g49240	ARR-B	A. thaliana
AATCT	919	-	1	putative APRR4 At5g49240	ARR-B	A. thaliana
AATCC	179	-	1	putative APRR4 At5g49240	ARR-B	A. thaliana
AATCC	204	-	1	putative APRR4 At5g49240	ARR-B	A. thaliana
AATCC	548	-	1	putative APRR4 At5g49240	ARR-B	A. thaliana
AGATT	1405	+	1	putative APRR4 At5g49240	ARR-B	A. thaliana
TATTC	1355	+	0.98	KAN1 KAN, At5g16560	Myb SANT ;MYB ;G2-like	A. thaliana	Repressed by AS2 in adaxial tissue. PMID:18849474	Transcriptional repressor that regulates lateral organ polarity. Promotes lateral organ abaxial identity by repressing the adaxial regulator ASYMMETRIC LEAVES2 (AS2) in abaxial cells. Required for abaxial identity in both leaves and carpels. Functions with KAN2 in the specification of polarity of the ovule outer integument. Regulates cambium activity by repressing the auxin efflux carrier PIN1. P…
AATAT	346	+	0.96	KAN1 KAN, At5g16560	Myb SANT ;MYB ;G2-like	A. thaliana	Repressed by AS2 in adaxial tissue. PMID:18849474	Transcriptional repressor that regulates lateral organ polarity. Promotes lateral organ abaxial identity by repressing the adaxial regulator ASYMMETRIC LEAVES2 (AS2) in abaxial cells. Required for abaxial identity in both leaves and carpels. Functions with KAN2 in the specification of polarity of the ovule outer integument. Regulates cambium activity by repressing the auxin efflux carrier PIN1. P…
AATAT	632	+	0.96	KAN1 KAN, At5g16560	Myb SANT ;MYB ;G2-like	A. thaliana	Repressed by AS2 in adaxial tissue. PMID:18849474	Transcriptional repressor that regulates lateral organ polarity. Promotes lateral organ abaxial identity by repressing the adaxial regulator ASYMMETRIC LEAVES2 (AS2) in abaxial cells. Required for abaxial identity in both leaves and carpels. Functions with KAN2 in the specification of polarity of the ovule outer integument. Regulates cambium activity by repressing the auxin efflux carrier PIN1. P…
AATAT	1355	+	0.96	KAN1 KAN, At5g16560	Myb SANT ;MYB ;G2-like	A. thaliana	Repressed by AS2 in adaxial tissue. PMID:18849474	Transcriptional repressor that regulates lateral organ polarity. Promotes lateral organ abaxial identity by repressing the adaxial regulator ASYMMETRIC LEAVES2 (AS2) in abaxial cells. Required for abaxial identity in both leaves and carpels. Functions with KAN2 in the specification of polarity of the ovule outer integument. Regulates cambium activity by repressing the auxin efflux carrier PIN1. P…
ATATT	346	-	0.96	KAN1 KAN, At5g16560	Myb SANT ;MYB ;G2-like	A. thaliana	Repressed by AS2 in adaxial tissue. PMID:18849474	Transcriptional repressor that regulates lateral organ polarity. Promotes lateral organ abaxial identity by repressing the adaxial regulator ASYMMETRIC LEAVES2 (AS2) in abaxial cells. Required for abaxial identity in both leaves and carpels. Functions with KAN2 in the specification of polarity of the ovule outer integument. Regulates cambium activity by repressing the auxin efflux carrier PIN1. P…
ATATT	632	-	0.96	KAN1 KAN, At5g16560	Myb SANT ;MYB ;G2-like	A. thaliana	Repressed by AS2 in adaxial tissue. PMID:18849474	Transcriptional repressor that regulates lateral organ polarity. Promotes lateral organ abaxial identity by repressing the adaxial regulator ASYMMETRIC LEAVES2 (AS2) in abaxial cells. Required for abaxial identity in both leaves and carpels. Functions with KAN2 in the specification of polarity of the ovule outer integument. Regulates cambium activity by repressing the auxin efflux carrier PIN1. P…
ATATT	1355	-	0.96	KAN1 KAN, At5g16560	Myb SANT ;MYB ;G2-like	A. thaliana	Repressed by AS2 in adaxial tissue. PMID:18849474	Transcriptional repressor that regulates lateral organ polarity. Promotes lateral organ abaxial identity by repressing the adaxial regulator ASYMMETRIC LEAVES2 (AS2) in abaxial cells. Required for abaxial identity in both leaves and carpels. Functions with KAN2 in the specification of polarity of the ovule outer integument. Regulates cambium activity by repressing the auxin efflux carrier PIN1. P…
TATCT	186 (in tandem repeat)	-	0.99	CCA1 At2g46830	MYB-related	A. thaliana	response to abscisic acid 16463103, response to auxin 16463103, response to cadmium ion 16463103, response to cold 21471455, response to ethylene 16463103, response to gibberellin 16463103, response to jasmonic acid 16463103, response to salicylic acid 16463103, response to salt stress 16463103	Transcription factor involved in the circadian clock and in the phytochrome regulation. Binds to the promoter regions of APRR1/TOC1 and TCP21/CHE to repress their transcription. Binds to the promoter regions of CAB2A and CAB2B to promote their transcription. Represses both LHY and itself. PMID: 9657153, PMID:11486091, PMID:12007421, PMID:12015970, PMID:19095940, PMID:19218364, PMID:19339503. long…
ATATC	1166	-	0.86	RVE3 ASG4, LCL3, At1g01520	MYB-related	A. thaliana	response to salt stress 16463103
GATAT	1215	+	0.86	RVE3 ASG4, LCL3, At1g01520	MYB-related	A. thaliana	response to salt stress 16463103
ATATC	1166	-	0.86	RVE8 LCL5, At3g09600	MYB-related	A. thaliana	response to abscisic acid 16463103, response to auxin 16463103, esponse to cadmium ion 16463103, response to ethylene 16463103, response to gibberellin 16463103, response to jasmonic acid 16463103, response to salicylic acid 16463103, response to salt stress 16463103	Transcriptional activator of evening element (EE)-containing clock-controlled genes. Forms a negative feedback loop with APRR5. Regulates the pattern of histone H3 acetylation of the TOC1 promoter. PMID:21205033, PMID:21474993, PMID:21483796, PMID:23638299. ubject to temperature associated alternative splicing producing mainly non-productive mRNAs. PMID:22902701 histone H3 acetylation 21205033, p…
GATAT	1215	+	0.86	RVE8 LCL5, At3g09600	MYB-related	A. thaliana	response to abscisic acid 16463103, response to auxin 16463103, esponse to cadmium ion 16463103, response to ethylene 16463103, response to gibberellin 16463103, response to jasmonic acid 16463103, response to salicylic acid 16463103, response to salt stress 16463103	Transcriptional activator of evening element (EE)-containing clock-controlled genes. Forms a negative feedback loop with APRR5. Regulates the pattern of histone H3 acetylation of the TOC1 promoter. PMID:21205033, PMID:21474993, PMID:21483796, PMID:23638299. ubject to temperature associated alternative splicing producing mainly non-productive mRNAs. PMID:22902701 histone H3 acetylation 21205033, p…
ATATC	1166	-	0.86	RVE5 At4g01280	MYB-related	A. thaliana	response to abscisic acid 16463103, response to auxin 16463103, response to cadmium ion 16463103, response to ethylene 16463103, response to gibberellin 16463103, response to jasmonic acid 16463103, response to salicylic acid 16463103, response to salt stress 16463103
GATAT	1215	+	0.86	RVE5 At4g01280	MYB-related	A. thaliana	response to abscisic acid 16463103, response to auxin 16463103, response to cadmium ion 16463103, response to ethylene 16463103, response to gibberellin 16463103, response to jasmonic acid 16463103, response to salicylic acid 16463103, response to salt stress 16463103
ATATC	1166	-	0.86	RVE4 LCL1, At5g02840	MYB-related	A. thaliana	response to abscisic acid 16463103, response to auxin 16463103, response to cadmium ion 16463103, response to ethylene 16463103, response to gibberellin 16463103, response to jasmonic acid 16463103, response to salicylic acid 16463103, response to salt stress 16463103	Probable transcription factor. PMID:17363273 regulation of circadian rhythm 23638299
GATAT	1215	+	0.86	RVE4 LCL1, At5g02840	MYB-related	A. thaliana	response to abscisic acid 16463103, response to auxin 16463103, response to cadmium ion 16463103, response to ethylene 16463103, response to gibberellin 16463103, response to jasmonic acid 16463103, response to salicylic acid 16463103, response to salt stress 16463103	Probable transcription factor. PMID:17363273 regulation of circadian rhythm 23638299
ATATC	1166	-	0.86	RVE6 At5g52660	MYB-related	A. thaliana	response to abscisic acid 16463103, response to cadmium ion 16463103, response to ethylene 16463103, response to gibberellin 16463103, response to jasmonic acid 16463103, response to salicylic acid 16463103, response to salt stress 16463103	Probable transcription factor. regulation of circadian rhythm 23638299
GATAT	1215	+	0.86	RVE6 At5g52660	MYB-related	A. thaliana	response to abscisic acid 16463103, response to cadmium ion 16463103, response to ethylene 16463103, response to gibberellin 16463103, response to jasmonic acid 16463103, response to salicylic acid 16463103, response to salt stress 16463103	Probable transcription factor. regulation of circadian rhythm 23638299
ATATC	1165	+	0.97	RVE7 EPR1, At1g18330	MYB-related/Myb/SANT	A. thaliana	Up-regulated transiently by red light and far red light.PMID:14523250 response to cadmium ion 16463103, response to ethylene 16463103, response to salt stress 16463103	Transcription factor involved in phytochrome A-mediated cotyledon opening. Controlled by the central oscillator mediated by LHY and CCA1. Part of a regulatory circadian feedback loop. Regulates its own expression. PMID:14523250
GATAT	1216	-	0.97	RVE7 EPR1, At1g18330	MYB-related/Myb/SANT	A. thaliana	Up-regulated transiently by red light and far red light.PMID:14523250 response to cadmium ion 16463103, response to ethylene 16463103, response to salt stress 16463103	Transcription factor involved in phytochrome A-mediated cotyledon opening. Controlled by the central oscillator mediated by LHY and CCA1. Part of a regulatory circadian feedback loop. Regulates its own expression. PMID:14523250
ATATC	1166	+	0.95	RVE1 At5g17300	MYB-related	A. thaliana	Down-regulated and strongly decreased amplitude of circadian oscillation upon cold treatment. PMID:19805390, PMID:23240770.	Morning-phased transcription factor integrating the circadian clock and auxin pathways. Binds to the evening element (EE) of promoters. Does not act within the central clock, but regulates free auxin levels in a time-of-day specific manner. Positively regulates the expression of YUC8 during the day, but has no effect during the night. Negative regulator of freezing tolerance. PMID:19805390, PMID:…
CTTTT	610	-	0.98	DOF2.5 DAG2, At2g46590	Dof	A. thaliana	response to cold (12084825), response to light stimulus (12084825)	Transcription factor specifically involved in the maternal control of seed germination. Regulates transcription by binding to a 5'-AA[AG]G-3' consensus core sequence. May ensure the activation of a component that would trigger germination as a consequence of red light perception. The regulatory role of DOF2.5/DAG2 appears to be opposite to that of DOF3.7/DAG1. Both zinc finger proteins may act on…
CTTTT	879	-	1	DOF2.5 DAG2, At2g46590	Dof	A. thaliana	response to cold (12084825), response to light stimulus (12084825)	Transcription factor specifically involved in the maternal control of seed germination. Regulates transcription by binding to a 5'-AA[AG]G-3' consensus core sequence. May ensure the activation of a component that would trigger germination as a consequence of red light perception. The regulatory role of DOF2.5/DAG2 appears to be opposite to that of DOF3.7/DAG1. Both zinc finger proteins may act on…
GCCTT	79	-	1	DOF2.5 DAG2, At2g46590	Dof	A. thaliana	response to cold (12084825), response to light stimulus (12084825)	Transcription factor specifically involved in the maternal control of seed germination. Regulates transcription by binding to a 5'-AA[AG]G-3' consensus core sequence. May ensure the activation of a component that would trigger germination as a consequence of red light perception. The regulatory role of DOF2.5/DAG2 appears to be opposite to that of DOF3.7/DAG1. Both zinc finger proteins may act on…
CCTTT	80	-	1	DOF2.5 DAG2, At2g46590	Dof	A. thaliana	response to cold (12084825), response to light stimulus (12084825)	Transcription factor specifically involved in the maternal control of seed germination. Regulates transcription by binding to a 5'-AA[AG]G-3' consensus core sequence. May ensure the activation of a component that would trigger germination as a consequence of red light perception. The regulatory role of DOF2.5/DAG2 appears to be opposite to that of DOF3.7/DAG1. Both zinc finger proteins may act on…
AAAGT	109	+	1	DOF2.5 DAG2, At2g46590	Dof	A. thaliana	response to cold (12084825), response to light stimulus (12084825)	Transcription factor specifically involved in the maternal control of seed germination. Regulates transcription by binding to a 5'-AA[AG]G-3' consensus core sequence. May ensure the activation of a component that would trigger germination as a consequence of red light perception. The regulatory role of DOF2.5/DAG2 appears to be opposite to that of DOF3.7/DAG1. Both zinc finger proteins may act on…
ACCTT	158	-	1	DOF2.5 DAG2, At2g46590	Dof	A. thaliana	response to cold (12084825), response to light stimulus (12084825)	Transcription factor specifically involved in the maternal control of seed germination. Regulates transcription by binding to a 5'-AA[AG]G-3' consensus core sequence. May ensure the activation of a component that would trigger germination as a consequence of red light perception. The regulatory role of DOF2.5/DAG2 appears to be opposite to that of DOF3.7/DAG1. Both zinc finger proteins may act on…
ACCTT	184	-	1	DOF2.5 DAG2, At2g46590	Dof	A. thaliana	response to cold (12084825), response to light stimulus (12084825)	Transcription factor specifically involved in the maternal control of seed germination. Regulates transcription by binding to a 5'-AA[AG]G-3' consensus core sequence. May ensure the activation of a component that would trigger germination as a consequence of red light perception. The regulatory role of DOF2.5/DAG2 appears to be opposite to that of DOF3.7/DAG1. Both zinc finger proteins may act on…
TCTTT	252	-	1	DOF2.5 DAG2, At2g46590	Dof	A. thaliana	response to cold (12084825), response to light stimulus (12084825)	Transcription factor specifically involved in the maternal control of seed germination. Regulates transcription by binding to a 5'-AA[AG]G-3' consensus core sequence. May ensure the activation of a component that would trigger germination as a consequence of red light perception. The regulatory role of DOF2.5/DAG2 appears to be opposite to that of DOF3.7/DAG1. Both zinc finger proteins may act on…
TCCTT	275	-	1	DOF2.5 DAG2, At2g46590	Dof	A. thaliana	response to cold (12084825), response to light stimulus (12084825)	Transcription factor specifically involved in the maternal control of seed germination. Regulates transcription by binding to a 5'-AA[AG]G-3' consensus core sequence. May ensure the activation of a component that would trigger germination as a consequence of red light perception. The regulatory role of DOF2.5/DAG2 appears to be opposite to that of DOF3.7/DAG1. Both zinc finger proteins may act on…
TCTTT	328	-	1	DOF2.5 DAG2, At2g46590	Dof	A. thaliana	response to cold (12084825), response to light stimulus (12084825)	Transcription factor specifically involved in the maternal control of seed germination. Regulates transcription by binding to a 5'-AA[AG]G-3' consensus core sequence. May ensure the activation of a component that would trigger germination as a consequence of red light perception. The regulatory role of DOF2.5/DAG2 appears to be opposite to that of DOF3.7/DAG1. Both zinc finger proteins may act on…
TCCTT	338	-	1	DOF2.5 DAG2, At2g46590	Dof	A. thaliana	response to cold (12084825), response to light stimulus (12084825)	Transcription factor specifically involved in the maternal control of seed germination. Regulates transcription by binding to a 5'-AA[AG]G-3' consensus core sequence. May ensure the activation of a component that would trigger germination as a consequence of red light perception. The regulatory role of DOF2.5/DAG2 appears to be opposite to that of DOF3.7/DAG1. Both zinc finger proteins may act on…
GCTTT	369	-	1	DOF2.5 DAG2, At2g46590	Dof	A. thaliana	response to cold (12084825), response to light stimulus (12084825)	Transcription factor specifically involved in the maternal control of seed germination. Regulates transcription by binding to a 5'-AA[AG]G-3' consensus core sequence. May ensure the activation of a component that would trigger germination as a consequence of red light perception. The regulatory role of DOF2.5/DAG2 appears to be opposite to that of DOF3.7/DAG1. Both zinc finger proteins may act on…
ACTTT	382	-	1	DOF2.5 DAG2, At2g46590	Dof	A. thaliana	response to cold (12084825), response to light stimulus (12084825)	Transcription factor specifically involved in the maternal control of seed germination. Regulates transcription by binding to a 5'-AA[AG]G-3' consensus core sequence. May ensure the activation of a component that would trigger germination as a consequence of red light perception. The regulatory role of DOF2.5/DAG2 appears to be opposite to that of DOF3.7/DAG1. Both zinc finger proteins may act on…
AAAGC	400	+	1	DOF2.5 DAG2, At2g46590	Dof	A. thaliana	response to cold (12084825), response to light stimulus (12084825)	Transcription factor specifically involved in the maternal control of seed germination. Regulates transcription by binding to a 5'-AA[AG]G-3' consensus core sequence. May ensure the activation of a component that would trigger germination as a consequence of red light perception. The regulatory role of DOF2.5/DAG2 appears to be opposite to that of DOF3.7/DAG1. Both zinc finger proteins may act on…
ACTTT	509	-	1	DOF2.5 DAG2, At2g46590	Dof	A. thaliana	response to cold (12084825), response to light stimulus (12084825)	Transcription factor specifically involved in the maternal control of seed germination. Regulates transcription by binding to a 5'-AA[AG]G-3' consensus core sequence. May ensure the activation of a component that would trigger germination as a consequence of red light perception. The regulatory role of DOF2.5/DAG2 appears to be opposite to that of DOF3.7/DAG1. Both zinc finger proteins may act on…
AAAGC	571	+	1	DOF2.5 DAG2, At2g46590	Dof	A. thaliana	response to cold (12084825), response to light stimulus (12084825)	Transcription factor specifically involved in the maternal control of seed germination. Regulates transcription by binding to a 5'-AA[AG]G-3' consensus core sequence. May ensure the activation of a component that would trigger germination as a consequence of red light perception. The regulatory role of DOF2.5/DAG2 appears to be opposite to that of DOF3.7/DAG1. Both zinc finger proteins may act on…
TCTTT	586	-	1	DOF2.5 DAG2, At2g46590	Dof	A. thaliana	response to cold (12084825), response to light stimulus (12084825)	Transcription factor specifically involved in the maternal control of seed germination. Regulates transcription by binding to a 5'-AA[AG]G-3' consensus core sequence. May ensure the activation of a component that would trigger germination as a consequence of red light perception. The regulatory role of DOF2.5/DAG2 appears to be opposite to that of DOF3.7/DAG1. Both zinc finger proteins may act on…
ACCTT	605	-	1	DOF2.5 DAG2, At2g46590	Dof	A. thaliana	response to cold (12084825), response to light stimulus (12084825)	Transcription factor specifically involved in the maternal control of seed germination. Regulates transcription by binding to a 5'-AA[AG]G-3' consensus core sequence. May ensure the activation of a component that would trigger germination as a consequence of red light perception. The regulatory role of DOF2.5/DAG2 appears to be opposite to that of DOF3.7/DAG1. Both zinc finger proteins may act on…
ACTTT	612	-	1	DOF2.5 DAG2, At2g46590	Dof	A. thaliana	response to cold (12084825), response to light stimulus (12084825)	Transcription factor specifically involved in the maternal control of seed germination. Regulates transcription by binding to a 5'-AA[AG]G-3' consensus core sequence. May ensure the activation of a component that would trigger germination as a consequence of red light perception. The regulatory role of DOF2.5/DAG2 appears to be opposite to that of DOF3.7/DAG1. Both zinc finger proteins may act on…
TCCTT	806	-	1	DOF2.5 DAG2, At2g46590	Dof	A. thaliana	response to cold (12084825), response to light stimulus (12084825)	Transcription factor specifically involved in the maternal control of seed germination. Regulates transcription by binding to a 5'-AA[AG]G-3' consensus core sequence. May ensure the activation of a component that would trigger germination as a consequence of red light perception. The regulatory role of DOF2.5/DAG2 appears to be opposite to that of DOF3.7/DAG1. Both zinc finger proteins may act on…
CCTTT	807	-	1	DOF2.5 DAG2, At2g46590	Dof	A. thaliana	response to cold (12084825), response to light stimulus (12084825)	Transcription factor specifically involved in the maternal control of seed germination. Regulates transcription by binding to a 5'-AA[AG]G-3' consensus core sequence. May ensure the activation of a component that would trigger germination as a consequence of red light perception. The regulatory role of DOF2.5/DAG2 appears to be opposite to that of DOF3.7/DAG1. Both zinc finger proteins may act on…
TCTTT	874	-	1	DOF2.5 DAG2, At2g46590	Dof	A. thaliana	response to cold (12084825), response to light stimulus (12084825)	Transcription factor specifically involved in the maternal control of seed germination. Regulates transcription by binding to a 5'-AA[AG]G-3' consensus core sequence. May ensure the activation of a component that would trigger germination as a consequence of red light perception. The regulatory role of DOF2.5/DAG2 appears to be opposite to that of DOF3.7/DAG1. Both zinc finger proteins may act on…
ACTTT	881	-	1	DOF2.5 DAG2, At2g46590	Dof	A. thaliana	response to cold (12084825), response to light stimulus (12084825)	Transcription factor specifically involved in the maternal control of seed germination. Regulates transcription by binding to a 5'-AA[AG]G-3' consensus core sequence. May ensure the activation of a component that would trigger germination as a consequence of red light perception. The regulatory role of DOF2.5/DAG2 appears to be opposite to that of DOF3.7/DAG1. Both zinc finger proteins may act on…
AAAGA	939	+	1	DOF2.5 DAG2, At2g46590	Dof	A. thaliana	response to cold (12084825), response to light stimulus (12084825)	Transcription factor specifically involved in the maternal control of seed germination. Regulates transcription by binding to a 5'-AA[AG]G-3' consensus core sequence. May ensure the activation of a component that would trigger germination as a consequence of red light perception. The regulatory role of DOF2.5/DAG2 appears to be opposite to that of DOF3.7/DAG1. Both zinc finger proteins may act on…
AAAGT	982	+	1	DOF2.5 DAG2, At2g46590	Dof	A. thaliana	response to cold (12084825), response to light stimulus (12084825)	Transcription factor specifically involved in the maternal control of seed germination. Regulates transcription by binding to a 5'-AA[AG]G-3' consensus core sequence. May ensure the activation of a component that would trigger germination as a consequence of red light perception. The regulatory role of DOF2.5/DAG2 appears to be opposite to that of DOF3.7/DAG1. Both zinc finger proteins may act on…
ACTTT	1021	-	1	DOF2.5 DAG2, At2g46590	Dof	A. thaliana	response to cold (12084825), response to light stimulus (12084825)	Transcription factor specifically involved in the maternal control of seed germination. Regulates transcription by binding to a 5'-AA[AG]G-3' consensus core sequence. May ensure the activation of a component that would trigger germination as a consequence of red light perception. The regulatory role of DOF2.5/DAG2 appears to be opposite to that of DOF3.7/DAG1. Both zinc finger proteins may act on…
AAAGG	1030	+	1	DOF2.5 DAG2, At2g46590	Dof	A. thaliana	response to cold (12084825), response to light stimulus (12084825)	Transcription factor specifically involved in the maternal control of seed germination. Regulates transcription by binding to a 5'-AA[AG]G-3' consensus core sequence. May ensure the activation of a component that would trigger germination as a consequence of red light perception. The regulatory role of DOF2.5/DAG2 appears to be opposite to that of DOF3.7/DAG1. Both zinc finger proteins may act on…
AAGGG	1031	+	1	DOF2.5 DAG2, At2g46590	Dof	A. thaliana	response to cold (12084825), response to light stimulus (12084825)	Transcription factor specifically involved in the maternal control of seed germination. Regulates transcription by binding to a 5'-AA[AG]G-3' consensus core sequence. May ensure the activation of a component that would trigger germination as a consequence of red light perception. The regulatory role of DOF2.5/DAG2 appears to be opposite to that of DOF3.7/DAG1. Both zinc finger proteins may act on…
TCCTT	1156	-	1	DOF2.5 DAG2, At2g46590	Dof	A. thaliana	response to cold (12084825), response to light stimulus (12084825)	Transcription factor specifically involved in the maternal control of seed germination. Regulates transcription by binding to a 5'-AA[AG]G-3' consensus core sequence. May ensure the activation of a component that would trigger germination as a consequence of red light perception. The regulatory role of DOF2.5/DAG2 appears to be opposite to that of DOF3.7/DAG1. Both zinc finger proteins may act on…
AAAGG	1289	+	1	DOF2.5 DAG2, At2g46590	Dof	A. thaliana	response to cold (12084825), response to light stimulus (12084825)	Transcription factor specifically involved in the maternal control of seed germination. Regulates transcription by binding to a 5'-AA[AG]G-3' consensus core sequence. May ensure the activation of a component that would trigger germination as a consequence of red light perception. The regulatory role of DOF2.5/DAG2 appears to be opposite to that of DOF3.7/DAG1. Both zinc finger proteins may act on…
AAGGC	1290	+	1	DOF2.5 DAG2, At2g46590	Dof	A. thaliana	response to cold (12084825), response to light stimulus (12084825)	Transcription factor specifically involved in the maternal control of seed germination. Regulates transcription by binding to a 5'-AA[AG]G-3' consensus core sequence. May ensure the activation of a component that would trigger germination as a consequence of red light perception. The regulatory role of DOF2.5/DAG2 appears to be opposite to that of DOF3.7/DAG1. Both zinc finger proteins may act on…
ACTTT	1297	-	1	DOF2.5 DAG2, At2g46590	Dof	A. thaliana	response to cold (12084825), response to light stimulus (12084825)	Transcription factor specifically involved in the maternal control of seed germination. Regulates transcription by binding to a 5'-AA[AG]G-3' consensus core sequence. May ensure the activation of a component that would trigger germination as a consequence of red light perception. The regulatory role of DOF2.5/DAG2 appears to be opposite to that of DOF3.7/DAG1. Both zinc finger proteins may act on…
AAAGG	1371	+	1	DOF2.5 DAG2, At2g46590	Dof	A. thaliana	response to cold (12084825), response to light stimulus (12084825)	Transcription factor specifically involved in the maternal control of seed germination. Regulates transcription by binding to a 5'-AA[AG]G-3' consensus core sequence. May ensure the activation of a component that would trigger germination as a consequence of red light perception. The regulatory role of DOF2.5/DAG2 appears to be opposite to that of DOF3.7/DAG1. Both zinc finger proteins may act on…
AAGGA	1372	+	1	DOF2.5 DAG2, At2g46590	Dof	A. thaliana	response to cold (12084825), response to light stimulus (12084825)	Transcription factor specifically involved in the maternal control of seed germination. Regulates transcription by binding to a 5'-AA[AG]G-3' consensus core sequence. May ensure the activation of a component that would trigger germination as a consequence of red light perception. The regulatory role of DOF2.5/DAG2 appears to be opposite to that of DOF3.7/DAG1. Both zinc finger proteins may act on…
AAAGA	1413	+	1	DOF2.5 DAG2, At2g46590	Dof	A. thaliana	response to cold (12084825), response to light stimulus (12084825)	Transcription factor specifically involved in the maternal control of seed germination. Regulates transcription by binding to a 5'-AA[AG]G-3' consensus core sequence. May ensure the activation of a component that would trigger germination as a consequence of red light perception. The regulatory role of DOF2.5/DAG2 appears to be opposite to that of DOF3.7/DAG1. Both zinc finger proteins may act on…
AAAGA	1420	+	1	DOF2.5 DAG2, At2g46590	Dof	A. thaliana	response to cold (12084825), response to light stimulus (12084825)	Transcription factor specifically involved in the maternal control of seed germination. Regulates transcription by binding to a 5'-AA[AG]G-3' consensus core sequence. May ensure the activation of a component that would trigger germination as a consequence of red light perception. The regulatory role of DOF2.5/DAG2 appears to be opposite to that of DOF3.7/DAG1. Both zinc finger proteins may act on…
CTTTT	380	-	1	DOF1.8 At1g64620	Dof	A. thaliana
CTTTT	610	-	1	DOF1.8 At1g64620	Dof	A. thaliana
CTTTT	879	-	1	DOF1.8 At1g64620	Dof	A. thaliana
CTTTT	1019	-	1	DOF1.8 At1g64620	Dof	A. thaliana
CTTTT	1295	-	1	DOF1.8 At1g64620	Dof	A. thaliana
CTTTT	369	-	1	DOF2.4 At2g37590	Dof	A. thaliana
CTTTT	612	-	1	DOF2.4 At2g37590	Dof	A. thaliana
CTTTT	881	-	1	DOF2.4 At2g37590	Dof	A. thaliana
AAAAG	398	+	1	DOF2.4 At2g37590	Dof	A. thaliana
GCCTT	79	-	1	DOF2.4 At2g37590	Dof	A. thaliana
CCTTT	80	-	1	DOF2.4 At2g37590	Dof	A. thaliana
AAAGT	109	+	1	DOF2.4 At2g37590	Dof	A. thaliana
ACCTT	158	-	1	DOF2.4 At2g37590	Dof	A. thaliana
ACCTT	184	-	1	DOF2.4 At2g37590	Dof	A. thaliana
TCTTT	252	-	1	DOF2.4 At2g37590	Dof	A. thaliana
TCCTT	275	-	1	DOF2.4 At2g37590	Dof	A. thaliana
TCTTT	328	-	1	DOF2.4 At2g37590	Dof	A. thaliana
TCCTT	338	-	1	DOF2.4 At2g37590	Dof	A. thaliana
GCTTT	369	-	1	DOF2.4 At2g37590	Dof	A. thaliana
ACTTT	382	-	1	DOF2.4 At2g37590	Dof	A. thaliana
AAAGC	400	+	1	DOF2.4 At2g37590	Dof	A. thaliana
ACTTT	509	-	1	DOF2.4 At2g37590	Dof	A. thaliana
AAAGC	571	+	1	DOF2.4 At2g37590	Dof	A. thaliana
TCTTT	586	-	1	DOF2.4 At2g37590	Dof	A. thaliana
ACCTT	605	-	1	DOF2.4 At2g37590	Dof	A. thaliana
ACTTT	612	-	1	DOF2.4 At2g37590	Dof	A. thaliana
TCCTT	806	-	1	DOF2.4 At2g37590	Dof	A. thaliana
CCTTT	807	-	1	DOF2.4 At2g37590	Dof	A. thaliana
TCTTT	874	-	1	DOF2.4 At2g37590	Dof	A. thaliana
ACTTT	881	-	1	DOF2.4 At2g37590	Dof	A. thaliana
AAAGA	939	+	1	DOF2.4 At2g37590	Dof	A. thaliana
AAAGT	982	+	1	DOF2.4 At2g37590	Dof	A. thaliana
ACTTT	1021	-	1	DOF2.4 At2g37590	Dof	A. thaliana
AAAGG	1030	+	1	DOF2.4 At2g37590	Dof	A. thaliana
AAGGG	1031	+	1	DOF2.4 At2g37590	Dof	A. thaliana
TCCTT	1156	-	1	DOF2.4 At2g37590	Dof	A. thaliana
AAAGG	1289	+	1	DOF2.4 At2g37590	Dof	A. thaliana
AAGGC	1290	+	1	DOF2.4 At2g37590	Dof	A. thaliana
ACTTT	1297	-	1	DOF2.4 At2g37590	Dof	A. thaliana
AAAGG	1371	+	1	DOF2.4 At2g37590	Dof	A. thaliana
AAGGA	1372	+	1	DOF2.4 At2g37590	Dof	A. thaliana
AAAGA	1413	+	1	DOF2.4 At2g37590	Dof	A. thaliana
AAAGA	1420	+	1	DOF2.4 At2g37590	Dof	A. thaliana
CTTTT	382	-	1	DOF3.1 ADOF2, At3g21270	Dof	A. thaliana
CTTTT	612	-	1	DOF3.1 ADOF2, At3g21270	Dof	A. thaliana
CTTTT	881	-	1	DOF3.1 ADOF2, At3g21270	Dof	A. thaliana
CTTTT	1021	-	1	DOF3.1 ADOF2, At3g21270	Dof	A. thaliana
CTTTT	1297	-	1	DOF3.1 ADOF2, At3g21270	Dof	A. thaliana
GCCTT	79	-	1	DOF3.1 ADOF2, At3g21270	Dof	A. thaliana
CCTTT	80	-	1	DOF3.1 ADOF2, At3g21270	Dof	A. thaliana
AAAGT	109	+	1	DOF3.1 ADOF2, At3g21270	Dof	A. thaliana
ACCTT	158	-	1	DOF3.1 ADOF2, At3g21270	Dof	A. thaliana
ACCTT	184	-	1	DOF3.1 ADOF2, At3g21270	Dof	A. thaliana
TCTTT	252	-	1	DOF3.1 ADOF2, At3g21270	Dof	A. thaliana
TCCTT	275	-	1	DOF3.1 ADOF2, At3g21270	Dof	A. thaliana
TCTTT	328	-	1	DOF3.1 ADOF2, At3g21270	Dof	A. thaliana
TCCTT	338	-	1	DOF3.1 ADOF2, At3g21270	Dof	A. thaliana
GCTTT	369	-	1	DOF3.1 ADOF2, At3g21270	Dof	A. thaliana
ACTTT	382	-	1	DOF3.1 ADOF2, At3g21270	Dof	A. thaliana
AAAGC	400	+	1	DOF3.1 ADOF2, At3g21270	Dof	A. thaliana
ACTTT	509	-	1	DOF3.1 ADOF2, At3g21270	Dof	A. thaliana
AAAGC	571	+	1	DOF3.1 ADOF2, At3g21270	Dof	A. thaliana
TCTTT	586	-	1	DOF3.1 ADOF2, At3g21270	Dof	A. thaliana
ACCTT	605	-	1	DOF3.1 ADOF2, At3g21270	Dof	A. thaliana
ACTTT	612	-	1	DOF3.1 ADOF2, At3g21270	Dof	A. thaliana
TCCTT	806	-	1	DOF3.1 ADOF2, At3g21270	Dof	A. thaliana
CCTTT	807	-	1	DOF3.1 ADOF2, At3g21270	Dof	A. thaliana
TCTTT	874	-	1	DOF3.1 ADOF2, At3g21270	Dof	A. thaliana
ACTTT	881	-	1	DOF3.1 ADOF2, At3g21270	Dof	A. thaliana
AAAGA	939	+	1	DOF3.1 ADOF2, At3g21270	Dof	A. thaliana
AAAGT	982	+	1	DOF3.1 ADOF2, At3g21270	Dof	A. thaliana
ACTTT	1021	-	1	DOF3.1 ADOF2, At3g21270	Dof	A. thaliana
AAAGG	1030	+	1	DOF3.1 ADOF2, At3g21270	Dof	A. thaliana
AAGGG	1031	+	1	DOF3.1 ADOF2, At3g21270	Dof	A. thaliana
TCCTT	1156	-	1	DOF3.1 ADOF2, At3g21270	Dof	A. thaliana
AAAGG	1289	+	1	DOF3.1 ADOF2, At3g21270	Dof	A. thaliana
AAGGC	1290	+	1	DOF3.1 ADOF2, At3g21270	Dof	A. thaliana
ACTTT	1297	-	1	DOF3.1 ADOF2, At3g21270	Dof	A. thaliana
AAAGG	1371	+	1	DOF3.1 ADOF2, At3g21270	Dof	A. thaliana
AAGGA	1372	+	1	DOF3.1 ADOF2, At3g21270	Dof	A. thaliana
AAAGA	1413	+	1	DOF3.1 ADOF2, At3g21270	Dof	A. thaliana
AAAGA	1420	+	1	DOF3.1 ADOF2, At3g21270	Dof	A. thaliana
CTTTT	380	-	0.99	CDF3 DOF3.3, HPPBF-2A, At3g47500	Dof	A. thaliana	Highly expressed at the beginning of the light period, then decreases, reaching a minimum between 16 and 29 hours after dawn before rising again at the end of the day PMID:19619493.	Regulates a photoperiodic flowering response. Transcriptional repressor of 'CONSTANS' expression. PMID:19619493.
CTTTT	610	-	0.99	CDF3 DOF3.3, HPPBF-2A, At3g47500	Dof	A. thaliana	Highly expressed at the beginning of the light period, then decreases, reaching a minimum between 16 and 29 hours after dawn before rising again at the end of the day PMID:19619493.	Regulates a photoperiodic flowering response. Transcriptional repressor of 'CONSTANS' expression. PMID:19619493.
CTTTT	879	-	1	CDF3 DOF3.3, HPPBF-2A, At3g47500	Dof	A. thaliana	Highly expressed at the beginning of the light period, then decreases, reaching a minimum between 16 and 29 hours after dawn before rising again at the end of the day PMID:19619493.	Regulates a photoperiodic flowering response. Transcriptional repressor of 'CONSTANS' expression. PMID:19619493.
CTTTT	1019	-	0.99	CDF3 DOF3.3, HPPBF-2A, At3g47500	Dof	A. thaliana	Highly expressed at the beginning of the light period, then decreases, reaching a minimum between 16 and 29 hours after dawn before rising again at the end of the day PMID:19619493.	Regulates a photoperiodic flowering response. Transcriptional repressor of 'CONSTANS' expression. PMID:19619493.
CTTTT	1295	-	0.99	CDF3 DOF3.3, HPPBF-2A, At3g47500	Dof	A. thaliana	Highly expressed at the beginning of the light period, then decreases, reaching a minimum between 16 and 29 hours after dawn before rising again at the end of the day PMID:19619493.	Regulates a photoperiodic flowering response. Transcriptional repressor of 'CONSTANS' expression. PMID:19619493.
GCCTT	79	-	1	CDF3 DOF3.3, HPPBF-2A, At3g47500	Dof	A. thaliana	Highly expressed at the beginning of the light period, then decreases, reaching a minimum between 16 and 29 hours after dawn before rising again at the end of the day PMID:19619493.	Regulates a photoperiodic flowering response. Transcriptional repressor of 'CONSTANS' expression. PMID:19619493.
CCTTT	80	-	1	CDF3 DOF3.3, HPPBF-2A, At3g47500	Dof	A. thaliana	Highly expressed at the beginning of the light period, then decreases, reaching a minimum between 16 and 29 hours after dawn before rising again at the end of the day PMID:19619493.	Regulates a photoperiodic flowering response. Transcriptional repressor of 'CONSTANS' expression. PMID:19619493.
AAAGT	109	+	1	CDF3 DOF3.3, HPPBF-2A, At3g47500	Dof	A. thaliana	Highly expressed at the beginning of the light period, then decreases, reaching a minimum between 16 and 29 hours after dawn before rising again at the end of the day PMID:19619493.	Regulates a photoperiodic flowering response. Transcriptional repressor of 'CONSTANS' expression. PMID:19619493.
ACCTT	158	-	1	CDF3 DOF3.3, HPPBF-2A, At3g47500	Dof	A. thaliana	Highly expressed at the beginning of the light period, then decreases, reaching a minimum between 16 and 29 hours after dawn before rising again at the end of the day PMID:19619493.	Regulates a photoperiodic flowering response. Transcriptional repressor of 'CONSTANS' expression. PMID:19619493.
ACCTT	184	-	1	CDF3 DOF3.3, HPPBF-2A, At3g47500	Dof	A. thaliana	Highly expressed at the beginning of the light period, then decreases, reaching a minimum between 16 and 29 hours after dawn before rising again at the end of the day PMID:19619493.	Regulates a photoperiodic flowering response. Transcriptional repressor of 'CONSTANS' expression. PMID:19619493.
TCTTT	252	-	1	CDF3 DOF3.3, HPPBF-2A, At3g47500	Dof	A. thaliana	Highly expressed at the beginning of the light period, then decreases, reaching a minimum between 16 and 29 hours after dawn before rising again at the end of the day PMID:19619493.	Regulates a photoperiodic flowering response. Transcriptional repressor of 'CONSTANS' expression. PMID:19619493.
TCCTT	275	-	1	CDF3 DOF3.3, HPPBF-2A, At3g47500	Dof	A. thaliana	Highly expressed at the beginning of the light period, then decreases, reaching a minimum between 16 and 29 hours after dawn before rising again at the end of the day PMID:19619493.	Regulates a photoperiodic flowering response. Transcriptional repressor of 'CONSTANS' expression. PMID:19619493.
TCTTT	328	-	1	CDF3 DOF3.3, HPPBF-2A, At3g47500	Dof	A. thaliana	Highly expressed at the beginning of the light period, then decreases, reaching a minimum between 16 and 29 hours after dawn before rising again at the end of the day PMID:19619493.	Regulates a photoperiodic flowering response. Transcriptional repressor of 'CONSTANS' expression. PMID:19619493.
TCCTT	338	-	1	CDF3 DOF3.3, HPPBF-2A, At3g47500	Dof	A. thaliana	Highly expressed at the beginning of the light period, then decreases, reaching a minimum between 16 and 29 hours after dawn before rising again at the end of the day PMID:19619493.	Regulates a photoperiodic flowering response. Transcriptional repressor of 'CONSTANS' expression. PMID:19619493.
GCTTT	369	-	1	CDF3 DOF3.3, HPPBF-2A, At3g47500	Dof	A. thaliana	Highly expressed at the beginning of the light period, then decreases, reaching a minimum between 16 and 29 hours after dawn before rising again at the end of the day PMID:19619493.	Regulates a photoperiodic flowering response. Transcriptional repressor of 'CONSTANS' expression. PMID:19619493.
ACTTT	382	-	1	CDF3 DOF3.3, HPPBF-2A, At3g47500	Dof	A. thaliana	Highly expressed at the beginning of the light period, then decreases, reaching a minimum between 16 and 29 hours after dawn before rising again at the end of the day PMID:19619493.	Regulates a photoperiodic flowering response. Transcriptional repressor of 'CONSTANS' expression. PMID:19619493.
AAAGC	400	+	1	CDF3 DOF3.3, HPPBF-2A, At3g47500	Dof	A. thaliana	Highly expressed at the beginning of the light period, then decreases, reaching a minimum between 16 and 29 hours after dawn before rising again at the end of the day PMID:19619493.	Regulates a photoperiodic flowering response. Transcriptional repressor of 'CONSTANS' expression. PMID:19619493.
ACTTT	509	-	1	CDF3 DOF3.3, HPPBF-2A, At3g47500	Dof	A. thaliana	Highly expressed at the beginning of the light period, then decreases, reaching a minimum between 16 and 29 hours after dawn before rising again at the end of the day PMID:19619493.	Regulates a photoperiodic flowering response. Transcriptional repressor of 'CONSTANS' expression. PMID:19619493.
AAAGC	571	+	1	CDF3 DOF3.3, HPPBF-2A, At3g47500	Dof	A. thaliana	Highly expressed at the beginning of the light period, then decreases, reaching a minimum between 16 and 29 hours after dawn before rising again at the end of the day PMID:19619493.	Regulates a photoperiodic flowering response. Transcriptional repressor of 'CONSTANS' expression. PMID:19619493.
TCTTT	586	-	1	CDF3 DOF3.3, HPPBF-2A, At3g47500	Dof	A. thaliana	Highly expressed at the beginning of the light period, then decreases, reaching a minimum between 16 and 29 hours after dawn before rising again at the end of the day PMID:19619493.	Regulates a photoperiodic flowering response. Transcriptional repressor of 'CONSTANS' expression. PMID:19619493.
ACCTT	605	-	1	CDF3 DOF3.3, HPPBF-2A, At3g47500	Dof	A. thaliana	Highly expressed at the beginning of the light period, then decreases, reaching a minimum between 16 and 29 hours after dawn before rising again at the end of the day PMID:19619493.	Regulates a photoperiodic flowering response. Transcriptional repressor of 'CONSTANS' expression. PMID:19619493.
ACTTT	612	-	1	CDF3 DOF3.3, HPPBF-2A, At3g47500	Dof	A. thaliana	Highly expressed at the beginning of the light period, then decreases, reaching a minimum between 16 and 29 hours after dawn before rising again at the end of the day PMID:19619493.	Regulates a photoperiodic flowering response. Transcriptional repressor of 'CONSTANS' expression. PMID:19619493.
TCCTT	806	-	1	CDF3 DOF3.3, HPPBF-2A, At3g47500	Dof	A. thaliana	Highly expressed at the beginning of the light period, then decreases, reaching a minimum between 16 and 29 hours after dawn before rising again at the end of the day PMID:19619493.	Regulates a photoperiodic flowering response. Transcriptional repressor of 'CONSTANS' expression. PMID:19619493.
CCTTT	807	-	1	CDF3 DOF3.3, HPPBF-2A, At3g47500	Dof	A. thaliana	Highly expressed at the beginning of the light period, then decreases, reaching a minimum between 16 and 29 hours after dawn before rising again at the end of the day PMID:19619493.	Regulates a photoperiodic flowering response. Transcriptional repressor of 'CONSTANS' expression. PMID:19619493.
TCTTT	874	-	1	CDF3 DOF3.3, HPPBF-2A, At3g47500	Dof	A. thaliana	Highly expressed at the beginning of the light period, then decreases, reaching a minimum between 16 and 29 hours after dawn before rising again at the end of the day PMID:19619493.	Regulates a photoperiodic flowering response. Transcriptional repressor of 'CONSTANS' expression. PMID:19619493.
ACTTT	881	-	1	CDF3 DOF3.3, HPPBF-2A, At3g47500	Dof	A. thaliana	Highly expressed at the beginning of the light period, then decreases, reaching a minimum between 16 and 29 hours after dawn before rising again at the end of the day PMID:19619493.	Regulates a photoperiodic flowering response. Transcriptional repressor of 'CONSTANS' expression. PMID:19619493.
AAAGA	939	+	1	CDF3 DOF3.3, HPPBF-2A, At3g47500	Dof	A. thaliana	Highly expressed at the beginning of the light period, then decreases, reaching a minimum between 16 and 29 hours after dawn before rising again at the end of the day PMID:19619493.	Regulates a photoperiodic flowering response. Transcriptional repressor of 'CONSTANS' expression. PMID:19619493.
AAAGT	982	+	1	CDF3 DOF3.3, HPPBF-2A, At3g47500	Dof	A. thaliana	Highly expressed at the beginning of the light period, then decreases, reaching a minimum between 16 and 29 hours after dawn before rising again at the end of the day PMID:19619493.	Regulates a photoperiodic flowering response. Transcriptional repressor of 'CONSTANS' expression. PMID:19619493.
ACTTT	1021	-	1	CDF3 DOF3.3, HPPBF-2A, At3g47500	Dof	A. thaliana	Highly expressed at the beginning of the light period, then decreases, reaching a minimum between 16 and 29 hours after dawn before rising again at the end of the day PMID:19619493.	Regulates a photoperiodic flowering response. Transcriptional repressor of 'CONSTANS' expression. PMID:19619493.
AAAGG	1030	+	1	CDF3 DOF3.3, HPPBF-2A, At3g47500	Dof	A. thaliana	Highly expressed at the beginning of the light period, then decreases, reaching a minimum between 16 and 29 hours after dawn before rising again at the end of the day PMID:19619493.	Regulates a photoperiodic flowering response. Transcriptional repressor of 'CONSTANS' expression. PMID:19619493.
AAGGG	1031	+	1	CDF3 DOF3.3, HPPBF-2A, At3g47500	Dof	A. thaliana	Highly expressed at the beginning of the light period, then decreases, reaching a minimum between 16 and 29 hours after dawn before rising again at the end of the day PMID:19619493.	Regulates a photoperiodic flowering response. Transcriptional repressor of 'CONSTANS' expression. PMID:19619493.
TCCTT	1156	-	1	CDF3 DOF3.3, HPPBF-2A, At3g47500	Dof	A. thaliana	Highly expressed at the beginning of the light period, then decreases, reaching a minimum between 16 and 29 hours after dawn before rising again at the end of the day PMID:19619493.	Regulates a photoperiodic flowering response. Transcriptional repressor of 'CONSTANS' expression. PMID:19619493.
AAAGG	1289	+	1	CDF3 DOF3.3, HPPBF-2A, At3g47500	Dof	A. thaliana	Highly expressed at the beginning of the light period, then decreases, reaching a minimum between 16 and 29 hours after dawn before rising again at the end of the day PMID:19619493.	Regulates a photoperiodic flowering response. Transcriptional repressor of 'CONSTANS' expression. PMID:19619493.
AAGGC	1290	+	1	CDF3 DOF3.3, HPPBF-2A, At3g47500	Dof	A. thaliana	Highly expressed at the beginning of the light period, then decreases, reaching a minimum between 16 and 29 hours after dawn before rising again at the end of the day PMID:19619493.	Regulates a photoperiodic flowering response. Transcriptional repressor of 'CONSTANS' expression. PMID:19619493.
ACTTT	1297	-	1	CDF3 DOF3.3, HPPBF-2A, At3g47500	Dof	A. thaliana	Highly expressed at the beginning of the light period, then decreases, reaching a minimum between 16 and 29 hours after dawn before rising again at the end of the day PMID:19619493.	Regulates a photoperiodic flowering response. Transcriptional repressor of 'CONSTANS' expression. PMID:19619493.
AAAGG	1371	+	1	CDF3 DOF3.3, HPPBF-2A, At3g47500	Dof	A. thaliana	Highly expressed at the beginning of the light period, then decreases, reaching a minimum between 16 and 29 hours after dawn before rising again at the end of the day PMID:19619493.	Regulates a photoperiodic flowering response. Transcriptional repressor of 'CONSTANS' expression. PMID:19619493.
AAGGA	1372	+	1	CDF3 DOF3.3, HPPBF-2A, At3g47500	Dof	A. thaliana	Highly expressed at the beginning of the light period, then decreases, reaching a minimum between 16 and 29 hours after dawn before rising again at the end of the day PMID:19619493.	Regulates a photoperiodic flowering response. Transcriptional repressor of 'CONSTANS' expression. PMID:19619493.
AAAGA	1413	+	1	CDF3 DOF3.3, HPPBF-2A, At3g47500	Dof	A. thaliana	Highly expressed at the beginning of the light period, then decreases, reaching a minimum between 16 and 29 hours after dawn before rising again at the end of the day PMID:19619493.	Regulates a photoperiodic flowering response. Transcriptional repressor of 'CONSTANS' expression. PMID:19619493.
AAAGA	1420	+	1	CDF3 DOF3.3, HPPBF-2A, At3g47500	Dof	A. thaliana	Highly expressed at the beginning of the light period, then decreases, reaching a minimum between 16 and 29 hours after dawn before rising again at the end of the day PMID:19619493.	Regulates a photoperiodic flowering response. Transcriptional repressor of 'CONSTANS' expression. PMID:19619493.
CTTTT	382	-	1	DOF4.7 At4g38000	Dof	A. thaliana		Involved in the negative regulation of floral organ abscission by binding to the typical DOF 5'-AAAG-3' sequences in the promoter of ADPG2/PGAZAT, and by down-regulating its expression. ADPG2/PGAZAT is an abscission-related and cell wall hydrolyzing polygalacturonase. May act through the interaction with ZFP2, an abscission-related transcription factor. Plants over-expressing DOF4.7 fail in the a…
CTTTT	612	-	1	DOF4.7 At4g38000	Dof	A. thaliana		Involved in the negative regulation of floral organ abscission by binding to the typical DOF 5'-AAAG-3' sequences in the promoter of ADPG2/PGAZAT, and by down-regulating its expression. ADPG2/PGAZAT is an abscission-related and cell wall hydrolyzing polygalacturonase. May act through the interaction with ZFP2, an abscission-related transcription factor. Plants over-expressing DOF4.7 fail in the a…
CTTTT	881	-	1	DOF4.7 At4g38000	Dof	A. thaliana		Involved in the negative regulation of floral organ abscission by binding to the typical DOF 5'-AAAG-3' sequences in the promoter of ADPG2/PGAZAT, and by down-regulating its expression. ADPG2/PGAZAT is an abscission-related and cell wall hydrolyzing polygalacturonase. May act through the interaction with ZFP2, an abscission-related transcription factor. Plants over-expressing DOF4.7 fail in the a…
CTTTT	1021	-	1	DOF4.7 At4g38000	Dof	A. thaliana		Involved in the negative regulation of floral organ abscission by binding to the typical DOF 5'-AAAG-3' sequences in the promoter of ADPG2/PGAZAT, and by down-regulating its expression. ADPG2/PGAZAT is an abscission-related and cell wall hydrolyzing polygalacturonase. May act through the interaction with ZFP2, an abscission-related transcription factor. Plants over-expressing DOF4.7 fail in the a…
CTTTT	1297	-	1	DOF4.7 At4g38000	Dof	A. thaliana		Involved in the negative regulation of floral organ abscission by binding to the typical DOF 5'-AAAG-3' sequences in the promoter of ADPG2/PGAZAT, and by down-regulating its expression. ADPG2/PGAZAT is an abscission-related and cell wall hydrolyzing polygalacturonase. May act through the interaction with ZFP2, an abscission-related transcription factor. Plants over-expressing DOF4.7 fail in the a…
GCCTT	79	-	1	DOF4.7 At4g38000	Dof	A. thaliana		Involved in the negative regulation of floral organ abscission by binding to the typical DOF 5'-AAAG-3' sequences in the promoter of ADPG2/PGAZAT, and by down-regulating its expression. ADPG2/PGAZAT is an abscission-related and cell wall hydrolyzing polygalacturonase. May act through the interaction with ZFP2, an abscission-related transcription factor. Plants over-expressing DOF4.7 fail in the a…
CCTTT	80	-	1	DOF4.7 At4g38000	Dof	A. thaliana		Involved in the negative regulation of floral organ abscission by binding to the typical DOF 5'-AAAG-3' sequences in the promoter of ADPG2/PGAZAT, and by down-regulating its expression. ADPG2/PGAZAT is an abscission-related and cell wall hydrolyzing polygalacturonase. May act through the interaction with ZFP2, an abscission-related transcription factor. Plants over-expressing DOF4.7 fail in the a…
AAAGT	109	+	1	DOF4.7 At4g38000	Dof	A. thaliana		Involved in the negative regulation of floral organ abscission by binding to the typical DOF 5'-AAAG-3' sequences in the promoter of ADPG2/PGAZAT, and by down-regulating its expression. ADPG2/PGAZAT is an abscission-related and cell wall hydrolyzing polygalacturonase. May act through the interaction with ZFP2, an abscission-related transcription factor. Plants over-expressing DOF4.7 fail in the a…
ACCTT	158	-	1	DOF4.7 At4g38000	Dof	A. thaliana		Involved in the negative regulation of floral organ abscission by binding to the typical DOF 5'-AAAG-3' sequences in the promoter of ADPG2/PGAZAT, and by down-regulating its expression. ADPG2/PGAZAT is an abscission-related and cell wall hydrolyzing polygalacturonase. May act through the interaction with ZFP2, an abscission-related transcription factor. Plants over-expressing DOF4.7 fail in the a…
ACCTT	184	-	1	DOF4.7 At4g38000	Dof	A. thaliana		Involved in the negative regulation of floral organ abscission by binding to the typical DOF 5'-AAAG-3' sequences in the promoter of ADPG2/PGAZAT, and by down-regulating its expression. ADPG2/PGAZAT is an abscission-related and cell wall hydrolyzing polygalacturonase. May act through the interaction with ZFP2, an abscission-related transcription factor. Plants over-expressing DOF4.7 fail in the a…
TCTTT	252	-	1	DOF4.7 At4g38000	Dof	A. thaliana		Involved in the negative regulation of floral organ abscission by binding to the typical DOF 5'-AAAG-3' sequences in the promoter of ADPG2/PGAZAT, and by down-regulating its expression. ADPG2/PGAZAT is an abscission-related and cell wall hydrolyzing polygalacturonase. May act through the interaction with ZFP2, an abscission-related transcription factor. Plants over-expressing DOF4.7 fail in the a…
TCCTT	275	-	1	DOF4.7 At4g38000	Dof	A. thaliana		Involved in the negative regulation of floral organ abscission by binding to the typical DOF 5'-AAAG-3' sequences in the promoter of ADPG2/PGAZAT, and by down-regulating its expression. ADPG2/PGAZAT is an abscission-related and cell wall hydrolyzing polygalacturonase. May act through the interaction with ZFP2, an abscission-related transcription factor. Plants over-expressing DOF4.7 fail in the a…
TCTTT	328	-	1	DOF4.7 At4g38000	Dof	A. thaliana		Involved in the negative regulation of floral organ abscission by binding to the typical DOF 5'-AAAG-3' sequences in the promoter of ADPG2/PGAZAT, and by down-regulating its expression. ADPG2/PGAZAT is an abscission-related and cell wall hydrolyzing polygalacturonase. May act through the interaction with ZFP2, an abscission-related transcription factor. Plants over-expressing DOF4.7 fail in the a…
TCCTT	338	-	1	DOF4.7 At4g38000	Dof	A. thaliana		Involved in the negative regulation of floral organ abscission by binding to the typical DOF 5'-AAAG-3' sequences in the promoter of ADPG2/PGAZAT, and by down-regulating its expression. ADPG2/PGAZAT is an abscission-related and cell wall hydrolyzing polygalacturonase. May act through the interaction with ZFP2, an abscission-related transcription factor. Plants over-expressing DOF4.7 fail in the a…
GCTTT	369	-	1	DOF4.7 At4g38000	Dof	A. thaliana		Involved in the negative regulation of floral organ abscission by binding to the typical DOF 5'-AAAG-3' sequences in the promoter of ADPG2/PGAZAT, and by down-regulating its expression. ADPG2/PGAZAT is an abscission-related and cell wall hydrolyzing polygalacturonase. May act through the interaction with ZFP2, an abscission-related transcription factor. Plants over-expressing DOF4.7 fail in the a…
ACTTT	382	-	1	DOF4.7 At4g38000	Dof	A. thaliana		Involved in the negative regulation of floral organ abscission by binding to the typical DOF 5'-AAAG-3' sequences in the promoter of ADPG2/PGAZAT, and by down-regulating its expression. ADPG2/PGAZAT is an abscission-related and cell wall hydrolyzing polygalacturonase. May act through the interaction with ZFP2, an abscission-related transcription factor. Plants over-expressing DOF4.7 fail in the a…
AAAGC	400	+	1	DOF4.7 At4g38000	Dof	A. thaliana		Involved in the negative regulation of floral organ abscission by binding to the typical DOF 5'-AAAG-3' sequences in the promoter of ADPG2/PGAZAT, and by down-regulating its expression. ADPG2/PGAZAT is an abscission-related and cell wall hydrolyzing polygalacturonase. May act through the interaction with ZFP2, an abscission-related transcription factor. Plants over-expressing DOF4.7 fail in the a…
ACTTT	509	-	1	DOF4.7 At4g38000	Dof	A. thaliana		Involved in the negative regulation of floral organ abscission by binding to the typical DOF 5'-AAAG-3' sequences in the promoter of ADPG2/PGAZAT, and by down-regulating its expression. ADPG2/PGAZAT is an abscission-related and cell wall hydrolyzing polygalacturonase. May act through the interaction with ZFP2, an abscission-related transcription factor. Plants over-expressing DOF4.7 fail in the a…
AAAGC	571	+	1	DOF4.7 At4g38000	Dof	A. thaliana		Involved in the negative regulation of floral organ abscission by binding to the typical DOF 5'-AAAG-3' sequences in the promoter of ADPG2/PGAZAT, and by down-regulating its expression. ADPG2/PGAZAT is an abscission-related and cell wall hydrolyzing polygalacturonase. May act through the interaction with ZFP2, an abscission-related transcription factor. Plants over-expressing DOF4.7 fail in the a…
TCTTT	586	-	1	DOF4.7 At4g38000	Dof	A. thaliana		Involved in the negative regulation of floral organ abscission by binding to the typical DOF 5'-AAAG-3' sequences in the promoter of ADPG2/PGAZAT, and by down-regulating its expression. ADPG2/PGAZAT is an abscission-related and cell wall hydrolyzing polygalacturonase. May act through the interaction with ZFP2, an abscission-related transcription factor. Plants over-expressing DOF4.7 fail in the a…
ACCTT	605	-	1	DOF4.7 At4g38000	Dof	A. thaliana		Involved in the negative regulation of floral organ abscission by binding to the typical DOF 5'-AAAG-3' sequences in the promoter of ADPG2/PGAZAT, and by down-regulating its expression. ADPG2/PGAZAT is an abscission-related and cell wall hydrolyzing polygalacturonase. May act through the interaction with ZFP2, an abscission-related transcription factor. Plants over-expressing DOF4.7 fail in the a…
ACTTT	612	-	1	DOF4.7 At4g38000	Dof	A. thaliana		Involved in the negative regulation of floral organ abscission by binding to the typical DOF 5'-AAAG-3' sequences in the promoter of ADPG2/PGAZAT, and by down-regulating its expression. ADPG2/PGAZAT is an abscission-related and cell wall hydrolyzing polygalacturonase. May act through the interaction with ZFP2, an abscission-related transcription factor. Plants over-expressing DOF4.7 fail in the a…
TCCTT	806	-	1	DOF4.7 At4g38000	Dof	A. thaliana		Involved in the negative regulation of floral organ abscission by binding to the typical DOF 5'-AAAG-3' sequences in the promoter of ADPG2/PGAZAT, and by down-regulating its expression. ADPG2/PGAZAT is an abscission-related and cell wall hydrolyzing polygalacturonase. May act through the interaction with ZFP2, an abscission-related transcription factor. Plants over-expressing DOF4.7 fail in the a…
CCTTT	807	-	1	DOF4.7 At4g38000	Dof	A. thaliana		Involved in the negative regulation of floral organ abscission by binding to the typical DOF 5'-AAAG-3' sequences in the promoter of ADPG2/PGAZAT, and by down-regulating its expression. ADPG2/PGAZAT is an abscission-related and cell wall hydrolyzing polygalacturonase. May act through the interaction with ZFP2, an abscission-related transcription factor. Plants over-expressing DOF4.7 fail in the a…
TCTTT	874	-	1	DOF4.7 At4g38000	Dof	A. thaliana		Involved in the negative regulation of floral organ abscission by binding to the typical DOF 5'-AAAG-3' sequences in the promoter of ADPG2/PGAZAT, and by down-regulating its expression. ADPG2/PGAZAT is an abscission-related and cell wall hydrolyzing polygalacturonase. May act through the interaction with ZFP2, an abscission-related transcription factor. Plants over-expressing DOF4.7 fail in the a…
ACTTT	881	-	1	DOF4.7 At4g38000	Dof	A. thaliana		Involved in the negative regulation of floral organ abscission by binding to the typical DOF 5'-AAAG-3' sequences in the promoter of ADPG2/PGAZAT, and by down-regulating its expression. ADPG2/PGAZAT is an abscission-related and cell wall hydrolyzing polygalacturonase. May act through the interaction with ZFP2, an abscission-related transcription factor. Plants over-expressing DOF4.7 fail in the a…
AAAGA	939	+	1	DOF4.7 At4g38000	Dof	A. thaliana		Involved in the negative regulation of floral organ abscission by binding to the typical DOF 5'-AAAG-3' sequences in the promoter of ADPG2/PGAZAT, and by down-regulating its expression. ADPG2/PGAZAT is an abscission-related and cell wall hydrolyzing polygalacturonase. May act through the interaction with ZFP2, an abscission-related transcription factor. Plants over-expressing DOF4.7 fail in the a…
AAAGT	982	+	1	DOF4.7 At4g38000	Dof	A. thaliana		Involved in the negative regulation of floral organ abscission by binding to the typical DOF 5'-AAAG-3' sequences in the promoter of ADPG2/PGAZAT, and by down-regulating its expression. ADPG2/PGAZAT is an abscission-related and cell wall hydrolyzing polygalacturonase. May act through the interaction with ZFP2, an abscission-related transcription factor. Plants over-expressing DOF4.7 fail in the a…
ACTTT	1021	-	1	DOF4.7 At4g38000	Dof	A. thaliana		Involved in the negative regulation of floral organ abscission by binding to the typical DOF 5'-AAAG-3' sequences in the promoter of ADPG2/PGAZAT, and by down-regulating its expression. ADPG2/PGAZAT is an abscission-related and cell wall hydrolyzing polygalacturonase. May act through the interaction with ZFP2, an abscission-related transcription factor. Plants over-expressing DOF4.7 fail in the a…
AAAGG	1030	+	1	DOF4.7 At4g38000	Dof	A. thaliana		Involved in the negative regulation of floral organ abscission by binding to the typical DOF 5'-AAAG-3' sequences in the promoter of ADPG2/PGAZAT, and by down-regulating its expression. ADPG2/PGAZAT is an abscission-related and cell wall hydrolyzing polygalacturonase. May act through the interaction with ZFP2, an abscission-related transcription factor. Plants over-expressing DOF4.7 fail in the a…
AAGGG	1031	+	1	DOF4.7 At4g38000	Dof	A. thaliana		Involved in the negative regulation of floral organ abscission by binding to the typical DOF 5'-AAAG-3' sequences in the promoter of ADPG2/PGAZAT, and by down-regulating its expression. ADPG2/PGAZAT is an abscission-related and cell wall hydrolyzing polygalacturonase. May act through the interaction with ZFP2, an abscission-related transcription factor. Plants over-expressing DOF4.7 fail in the a…
TCCTT	1156	-	1	DOF4.7 At4g38000	Dof	A. thaliana		Involved in the negative regulation of floral organ abscission by binding to the typical DOF 5'-AAAG-3' sequences in the promoter of ADPG2/PGAZAT, and by down-regulating its expression. ADPG2/PGAZAT is an abscission-related and cell wall hydrolyzing polygalacturonase. May act through the interaction with ZFP2, an abscission-related transcription factor. Plants over-expressing DOF4.7 fail in the a…
AAAGG	1289	+	1	DOF4.7 At4g38000	Dof	A. thaliana		Involved in the negative regulation of floral organ abscission by binding to the typical DOF 5'-AAAG-3' sequences in the promoter of ADPG2/PGAZAT, and by down-regulating its expression. ADPG2/PGAZAT is an abscission-related and cell wall hydrolyzing polygalacturonase. May act through the interaction with ZFP2, an abscission-related transcription factor. Plants over-expressing DOF4.7 fail in the a…
AAGGC	1290	+	1	DOF4.7 At4g38000	Dof	A. thaliana		Involved in the negative regulation of floral organ abscission by binding to the typical DOF 5'-AAAG-3' sequences in the promoter of ADPG2/PGAZAT, and by down-regulating its expression. ADPG2/PGAZAT is an abscission-related and cell wall hydrolyzing polygalacturonase. May act through the interaction with ZFP2, an abscission-related transcription factor. Plants over-expressing DOF4.7 fail in the a…
ACTTT	1297	-	1	DOF4.7 At4g38000	Dof	A. thaliana		Involved in the negative regulation of floral organ abscission by binding to the typical DOF 5'-AAAG-3' sequences in the promoter of ADPG2/PGAZAT, and by down-regulating its expression. ADPG2/PGAZAT is an abscission-related and cell wall hydrolyzing polygalacturonase. May act through the interaction with ZFP2, an abscission-related transcription factor. Plants over-expressing DOF4.7 fail in the a…
AAAGG	1371	+	1	DOF4.7 At4g38000	Dof	A. thaliana		Involved in the negative regulation of floral organ abscission by binding to the typical DOF 5'-AAAG-3' sequences in the promoter of ADPG2/PGAZAT, and by down-regulating its expression. ADPG2/PGAZAT is an abscission-related and cell wall hydrolyzing polygalacturonase. May act through the interaction with ZFP2, an abscission-related transcription factor. Plants over-expressing DOF4.7 fail in the a…
AAGGA	1372	+	1	DOF4.7 At4g38000	Dof	A. thaliana		Involved in the negative regulation of floral organ abscission by binding to the typical DOF 5'-AAAG-3' sequences in the promoter of ADPG2/PGAZAT, and by down-regulating its expression. ADPG2/PGAZAT is an abscission-related and cell wall hydrolyzing polygalacturonase. May act through the interaction with ZFP2, an abscission-related transcription factor. Plants over-expressing DOF4.7 fail in the a…
AAAGA	1413	+	1	DOF4.7 At4g38000	Dof	A. thaliana		Involved in the negative regulation of floral organ abscission by binding to the typical DOF 5'-AAAG-3' sequences in the promoter of ADPG2/PGAZAT, and by down-regulating its expression. ADPG2/PGAZAT is an abscission-related and cell wall hydrolyzing polygalacturonase. May act through the interaction with ZFP2, an abscission-related transcription factor. Plants over-expressing DOF4.7 fail in the a…
AAAGA	1420	+	1	DOF4.7 At4g38000	Dof	A. thaliana		Involved in the negative regulation of floral organ abscission by binding to the typical DOF 5'-AAAG-3' sequences in the promoter of ADPG2/PGAZAT, and by down-regulating its expression. ADPG2/PGAZAT is an abscission-related and cell wall hydrolyzing polygalacturonase. May act through the interaction with ZFP2, an abscission-related transcription factor. Plants over-expressing DOF4.7 fail in the a…
CTTTT	367	-	0.98	CDF2 DOF5.2, At5g39660	Dof	A. thaliana	Highly expressed at the beginning of the light period, then decreases, reaching a minimum between 16 and 29 hours after dawn before rising again at the end of the day. Regulated at the protein level by ADO3 and GI pos-transcriptionally. PMID:19619493	Regulates a photoperiodic flowering response. Transcriptional repressor of 'CONSTANS' expression. The stability of CDF2 is controlled by 'GIGANTEA' and redundantly by ADO3, ADO2 and/or ADO1. PMID:19619493
CTTTT	610	-	0.99	CDF2 DOF5.2, At5g39660	Dof	A. thaliana	Highly expressed at the beginning of the light period, then decreases, reaching a minimum between 16 and 29 hours after dawn before rising again at the end of the day. Regulated at the protein level by ADO3 and GI pos-transcriptionally. PMID:19619493	Regulates a photoperiodic flowering response. Transcriptional repressor of 'CONSTANS' expression. The stability of CDF2 is controlled by 'GIGANTEA' and redundantly by ADO3, ADO2 and/or ADO1. PMID:19619493
CTTTT	805	-	0.98	CDF2 DOF5.2, At5g39660	Dof	A. thaliana	Highly expressed at the beginning of the light period, then decreases, reaching a minimum between 16 and 29 hours after dawn before rising again at the end of the day. Regulated at the protein level by ADO3 and GI pos-transcriptionally. PMID:19619493	Regulates a photoperiodic flowering response. Transcriptional repressor of 'CONSTANS' expression. The stability of CDF2 is controlled by 'GIGANTEA' and redundantly by ADO3, ADO2 and/or ADO1. PMID:19619493
CTTTT	879	-	1	CDF2 DOF5.2, At5g39660	Dof	A. thaliana	Highly expressed at the beginning of the light period, then decreases, reaching a minimum between 16 and 29 hours after dawn before rising again at the end of the day. Regulated at the protein level by ADO3 and GI pos-transcriptionally. PMID:19619493	Regulates a photoperiodic flowering response. Transcriptional repressor of 'CONSTANS' expression. The stability of CDF2 is controlled by 'GIGANTEA' and redundantly by ADO3, ADO2 and/or ADO1. PMID:19619493
AAAAG	397	+	0.98	CDF2 DOF5.2, At5g39660	Dof	A. thaliana	Highly expressed at the beginning of the light period, then decreases, reaching a minimum between 16 and 29 hours after dawn before rising again at the end of the day. Regulated at the protein level by ADO3 and GI pos-transcriptionally. PMID:19619493	Regulates a photoperiodic flowering response. Transcriptional repressor of 'CONSTANS' expression. The stability of CDF2 is controlled by 'GIGANTEA' and redundantly by ADO3, ADO2 and/or ADO1. PMID:19619493
GCCTT	79	-	1	CDF2 DOF5.2, At5g39660	Dof	A. thaliana	Highly expressed at the beginning of the light period, then decreases, reaching a minimum between 16 and 29 hours after dawn before rising again at the end of the day. Regulated at the protein level by ADO3 and GI pos-transcriptionally. PMID:19619493	Regulates a photoperiodic flowering response. Transcriptional repressor of 'CONSTANS' expression. The stability of CDF2 is controlled by 'GIGANTEA' and redundantly by ADO3, ADO2 and/or ADO1. PMID:19619493
CCTTT	80	-	1	CDF2 DOF5.2, At5g39660	Dof	A. thaliana	Highly expressed at the beginning of the light period, then decreases, reaching a minimum between 16 and 29 hours after dawn before rising again at the end of the day. Regulated at the protein level by ADO3 and GI pos-transcriptionally. PMID:19619493	Regulates a photoperiodic flowering response. Transcriptional repressor of 'CONSTANS' expression. The stability of CDF2 is controlled by 'GIGANTEA' and redundantly by ADO3, ADO2 and/or ADO1. PMID:19619493
AAAGT	109	+	1	CDF2 DOF5.2, At5g39660	Dof	A. thaliana	Highly expressed at the beginning of the light period, then decreases, reaching a minimum between 16 and 29 hours after dawn before rising again at the end of the day. Regulated at the protein level by ADO3 and GI pos-transcriptionally. PMID:19619493	Regulates a photoperiodic flowering response. Transcriptional repressor of 'CONSTANS' expression. The stability of CDF2 is controlled by 'GIGANTEA' and redundantly by ADO3, ADO2 and/or ADO1. PMID:19619493
ACCTT	158	-	1	CDF2 DOF5.2, At5g39660	Dof	A. thaliana	Highly expressed at the beginning of the light period, then decreases, reaching a minimum between 16 and 29 hours after dawn before rising again at the end of the day. Regulated at the protein level by ADO3 and GI pos-transcriptionally. PMID:19619493	Regulates a photoperiodic flowering response. Transcriptional repressor of 'CONSTANS' expression. The stability of CDF2 is controlled by 'GIGANTEA' and redundantly by ADO3, ADO2 and/or ADO1. PMID:19619493
ACCTT	184	-	1	CDF2 DOF5.2, At5g39660	Dof	A. thaliana	Highly expressed at the beginning of the light period, then decreases, reaching a minimum between 16 and 29 hours after dawn before rising again at the end of the day. Regulated at the protein level by ADO3 and GI pos-transcriptionally. PMID:19619493	Regulates a photoperiodic flowering response. Transcriptional repressor of 'CONSTANS' expression. The stability of CDF2 is controlled by 'GIGANTEA' and redundantly by ADO3, ADO2 and/or ADO1. PMID:19619493
TCTTT	252	-	1	CDF2 DOF5.2, At5g39660	Dof	A. thaliana	Highly expressed at the beginning of the light period, then decreases, reaching a minimum between 16 and 29 hours after dawn before rising again at the end of the day. Regulated at the protein level by ADO3 and GI pos-transcriptionally. PMID:19619493	Regulates a photoperiodic flowering response. Transcriptional repressor of 'CONSTANS' expression. The stability of CDF2 is controlled by 'GIGANTEA' and redundantly by ADO3, ADO2 and/or ADO1. PMID:19619493
TCCTT	275	-	1	CDF2 DOF5.2, At5g39660	Dof	A. thaliana	Highly expressed at the beginning of the light period, then decreases, reaching a minimum between 16 and 29 hours after dawn before rising again at the end of the day. Regulated at the protein level by ADO3 and GI pos-transcriptionally. PMID:19619493	Regulates a photoperiodic flowering response. Transcriptional repressor of 'CONSTANS' expression. The stability of CDF2 is controlled by 'GIGANTEA' and redundantly by ADO3, ADO2 and/or ADO1. PMID:19619493
TCTTT	328	-	1	CDF2 DOF5.2, At5g39660	Dof	A. thaliana	Highly expressed at the beginning of the light period, then decreases, reaching a minimum between 16 and 29 hours after dawn before rising again at the end of the day. Regulated at the protein level by ADO3 and GI pos-transcriptionally. PMID:19619493	Regulates a photoperiodic flowering response. Transcriptional repressor of 'CONSTANS' expression. The stability of CDF2 is controlled by 'GIGANTEA' and redundantly by ADO3, ADO2 and/or ADO1. PMID:19619493
TCCTT	338	-	1	CDF2 DOF5.2, At5g39660	Dof	A. thaliana	Highly expressed at the beginning of the light period, then decreases, reaching a minimum between 16 and 29 hours after dawn before rising again at the end of the day. Regulated at the protein level by ADO3 and GI pos-transcriptionally. PMID:19619493	Regulates a photoperiodic flowering response. Transcriptional repressor of 'CONSTANS' expression. The stability of CDF2 is controlled by 'GIGANTEA' and redundantly by ADO3, ADO2 and/or ADO1. PMID:19619493
GCTTT	369	-	1	CDF2 DOF5.2, At5g39660	Dof	A. thaliana	Highly expressed at the beginning of the light period, then decreases, reaching a minimum between 16 and 29 hours after dawn before rising again at the end of the day. Regulated at the protein level by ADO3 and GI pos-transcriptionally. PMID:19619493	Regulates a photoperiodic flowering response. Transcriptional repressor of 'CONSTANS' expression. The stability of CDF2 is controlled by 'GIGANTEA' and redundantly by ADO3, ADO2 and/or ADO1. PMID:19619493
ACTTT	382	-	1	CDF2 DOF5.2, At5g39660	Dof	A. thaliana	Highly expressed at the beginning of the light period, then decreases, reaching a minimum between 16 and 29 hours after dawn before rising again at the end of the day. Regulated at the protein level by ADO3 and GI pos-transcriptionally. PMID:19619493	Regulates a photoperiodic flowering response. Transcriptional repressor of 'CONSTANS' expression. The stability of CDF2 is controlled by 'GIGANTEA' and redundantly by ADO3, ADO2 and/or ADO1. PMID:19619493
AAAGC	400	+	1	CDF2 DOF5.2, At5g39660	Dof	A. thaliana	Highly expressed at the beginning of the light period, then decreases, reaching a minimum between 16 and 29 hours after dawn before rising again at the end of the day. Regulated at the protein level by ADO3 and GI pos-transcriptionally. PMID:19619493	Regulates a photoperiodic flowering response. Transcriptional repressor of 'CONSTANS' expression. The stability of CDF2 is controlled by 'GIGANTEA' and redundantly by ADO3, ADO2 and/or ADO1. PMID:19619493
ACTTT	509	-	1	CDF2 DOF5.2, At5g39660	Dof	A. thaliana	Highly expressed at the beginning of the light period, then decreases, reaching a minimum between 16 and 29 hours after dawn before rising again at the end of the day. Regulated at the protein level by ADO3 and GI pos-transcriptionally. PMID:19619493	Regulates a photoperiodic flowering response. Transcriptional repressor of 'CONSTANS' expression. The stability of CDF2 is controlled by 'GIGANTEA' and redundantly by ADO3, ADO2 and/or ADO1. PMID:19619493
AAAGC	571	+	1	CDF2 DOF5.2, At5g39660	Dof	A. thaliana	Highly expressed at the beginning of the light period, then decreases, reaching a minimum between 16 and 29 hours after dawn before rising again at the end of the day. Regulated at the protein level by ADO3 and GI pos-transcriptionally. PMID:19619493	Regulates a photoperiodic flowering response. Transcriptional repressor of 'CONSTANS' expression. The stability of CDF2 is controlled by 'GIGANTEA' and redundantly by ADO3, ADO2 and/or ADO1. PMID:19619493
TCTTT	586	-	1	CDF2 DOF5.2, At5g39660	Dof	A. thaliana	Highly expressed at the beginning of the light period, then decreases, reaching a minimum between 16 and 29 hours after dawn before rising again at the end of the day. Regulated at the protein level by ADO3 and GI pos-transcriptionally. PMID:19619493	Regulates a photoperiodic flowering response. Transcriptional repressor of 'CONSTANS' expression. The stability of CDF2 is controlled by 'GIGANTEA' and redundantly by ADO3, ADO2 and/or ADO1. PMID:19619493
ACCTT	605	-	1	CDF2 DOF5.2, At5g39660	Dof	A. thaliana	Highly expressed at the beginning of the light period, then decreases, reaching a minimum between 16 and 29 hours after dawn before rising again at the end of the day. Regulated at the protein level by ADO3 and GI pos-transcriptionally. PMID:19619493	Regulates a photoperiodic flowering response. Transcriptional repressor of 'CONSTANS' expression. The stability of CDF2 is controlled by 'GIGANTEA' and redundantly by ADO3, ADO2 and/or ADO1. PMID:19619493
ACTTT	612	-	1	CDF2 DOF5.2, At5g39660	Dof	A. thaliana	Highly expressed at the beginning of the light period, then decreases, reaching a minimum between 16 and 29 hours after dawn before rising again at the end of the day. Regulated at the protein level by ADO3 and GI pos-transcriptionally. PMID:19619493	Regulates a photoperiodic flowering response. Transcriptional repressor of 'CONSTANS' expression. The stability of CDF2 is controlled by 'GIGANTEA' and redundantly by ADO3, ADO2 and/or ADO1. PMID:19619493
TCCTT	806	-	1	CDF2 DOF5.2, At5g39660	Dof	A. thaliana	Highly expressed at the beginning of the light period, then decreases, reaching a minimum between 16 and 29 hours after dawn before rising again at the end of the day. Regulated at the protein level by ADO3 and GI pos-transcriptionally. PMID:19619493	Regulates a photoperiodic flowering response. Transcriptional repressor of 'CONSTANS' expression. The stability of CDF2 is controlled by 'GIGANTEA' and redundantly by ADO3, ADO2 and/or ADO1. PMID:19619493
CCTTT	807	-	1	CDF2 DOF5.2, At5g39660	Dof	A. thaliana	Highly expressed at the beginning of the light period, then decreases, reaching a minimum between 16 and 29 hours after dawn before rising again at the end of the day. Regulated at the protein level by ADO3 and GI pos-transcriptionally. PMID:19619493	Regulates a photoperiodic flowering response. Transcriptional repressor of 'CONSTANS' expression. The stability of CDF2 is controlled by 'GIGANTEA' and redundantly by ADO3, ADO2 and/or ADO1. PMID:19619493
TCTTT	874	-	1	CDF2 DOF5.2, At5g39660	Dof	A. thaliana	Highly expressed at the beginning of the light period, then decreases, reaching a minimum between 16 and 29 hours after dawn before rising again at the end of the day. Regulated at the protein level by ADO3 and GI pos-transcriptionally. PMID:19619493	Regulates a photoperiodic flowering response. Transcriptional repressor of 'CONSTANS' expression. The stability of CDF2 is controlled by 'GIGANTEA' and redundantly by ADO3, ADO2 and/or ADO1. PMID:19619493
ACTTT	881	-	1	CDF2 DOF5.2, At5g39660	Dof	A. thaliana	Highly expressed at the beginning of the light period, then decreases, reaching a minimum between 16 and 29 hours after dawn before rising again at the end of the day. Regulated at the protein level by ADO3 and GI pos-transcriptionally. PMID:19619493	Regulates a photoperiodic flowering response. Transcriptional repressor of 'CONSTANS' expression. The stability of CDF2 is controlled by 'GIGANTEA' and redundantly by ADO3, ADO2 and/or ADO1. PMID:19619493
AAAGA	939	+	1	CDF2 DOF5.2, At5g39660	Dof	A. thaliana	Highly expressed at the beginning of the light period, then decreases, reaching a minimum between 16 and 29 hours after dawn before rising again at the end of the day. Regulated at the protein level by ADO3 and GI pos-transcriptionally. PMID:19619493	Regulates a photoperiodic flowering response. Transcriptional repressor of 'CONSTANS' expression. The stability of CDF2 is controlled by 'GIGANTEA' and redundantly by ADO3, ADO2 and/or ADO1. PMID:19619493
AAAGT	982	+	1	CDF2 DOF5.2, At5g39660	Dof	A. thaliana	Highly expressed at the beginning of the light period, then decreases, reaching a minimum between 16 and 29 hours after dawn before rising again at the end of the day. Regulated at the protein level by ADO3 and GI pos-transcriptionally. PMID:19619493	Regulates a photoperiodic flowering response. Transcriptional repressor of 'CONSTANS' expression. The stability of CDF2 is controlled by 'GIGANTEA' and redundantly by ADO3, ADO2 and/or ADO1. PMID:19619493
ACTTT	1021	-	1	CDF2 DOF5.2, At5g39660	Dof	A. thaliana	Highly expressed at the beginning of the light period, then decreases, reaching a minimum between 16 and 29 hours after dawn before rising again at the end of the day. Regulated at the protein level by ADO3 and GI pos-transcriptionally. PMID:19619493	Regulates a photoperiodic flowering response. Transcriptional repressor of 'CONSTANS' expression. The stability of CDF2 is controlled by 'GIGANTEA' and redundantly by ADO3, ADO2 and/or ADO1. PMID:19619493
AAAGG	1030	+	1	CDF2 DOF5.2, At5g39660	Dof	A. thaliana	Highly expressed at the beginning of the light period, then decreases, reaching a minimum between 16 and 29 hours after dawn before rising again at the end of the day. Regulated at the protein level by ADO3 and GI pos-transcriptionally. PMID:19619493	Regulates a photoperiodic flowering response. Transcriptional repressor of 'CONSTANS' expression. The stability of CDF2 is controlled by 'GIGANTEA' and redundantly by ADO3, ADO2 and/or ADO1. PMID:19619493
AAGGG	1031	+	1	CDF2 DOF5.2, At5g39660	Dof	A. thaliana	Highly expressed at the beginning of the light period, then decreases, reaching a minimum between 16 and 29 hours after dawn before rising again at the end of the day. Regulated at the protein level by ADO3 and GI pos-transcriptionally. PMID:19619493	Regulates a photoperiodic flowering response. Transcriptional repressor of 'CONSTANS' expression. The stability of CDF2 is controlled by 'GIGANTEA' and redundantly by ADO3, ADO2 and/or ADO1. PMID:19619493
TCCTT	1156	-	1	CDF2 DOF5.2, At5g39660	Dof	A. thaliana	Highly expressed at the beginning of the light period, then decreases, reaching a minimum between 16 and 29 hours after dawn before rising again at the end of the day. Regulated at the protein level by ADO3 and GI pos-transcriptionally. PMID:19619493	Regulates a photoperiodic flowering response. Transcriptional repressor of 'CONSTANS' expression. The stability of CDF2 is controlled by 'GIGANTEA' and redundantly by ADO3, ADO2 and/or ADO1. PMID:19619493
AAAGG	1289	+	1	CDF2 DOF5.2, At5g39660	Dof	A. thaliana	Highly expressed at the beginning of the light period, then decreases, reaching a minimum between 16 and 29 hours after dawn before rising again at the end of the day. Regulated at the protein level by ADO3 and GI pos-transcriptionally. PMID:19619493	Regulates a photoperiodic flowering response. Transcriptional repressor of 'CONSTANS' expression. The stability of CDF2 is controlled by 'GIGANTEA' and redundantly by ADO3, ADO2 and/or ADO1. PMID:19619493
AAGGC	1290	+	1	CDF2 DOF5.2, At5g39660	Dof	A. thaliana	Highly expressed at the beginning of the light period, then decreases, reaching a minimum between 16 and 29 hours after dawn before rising again at the end of the day. Regulated at the protein level by ADO3 and GI pos-transcriptionally. PMID:19619493	Regulates a photoperiodic flowering response. Transcriptional repressor of 'CONSTANS' expression. The stability of CDF2 is controlled by 'GIGANTEA' and redundantly by ADO3, ADO2 and/or ADO1. PMID:19619493
ACTTT	1297	-	1	CDF2 DOF5.2, At5g39660	Dof	A. thaliana	Highly expressed at the beginning of the light period, then decreases, reaching a minimum between 16 and 29 hours after dawn before rising again at the end of the day. Regulated at the protein level by ADO3 and GI pos-transcriptionally. PMID:19619493	Regulates a photoperiodic flowering response. Transcriptional repressor of 'CONSTANS' expression. The stability of CDF2 is controlled by 'GIGANTEA' and redundantly by ADO3, ADO2 and/or ADO1. PMID:19619493
AAAGG	1371	+	1	CDF2 DOF5.2, At5g39660	Dof	A. thaliana	Highly expressed at the beginning of the light period, then decreases, reaching a minimum between 16 and 29 hours after dawn before rising again at the end of the day. Regulated at the protein level by ADO3 and GI pos-transcriptionally. PMID:19619493	Regulates a photoperiodic flowering response. Transcriptional repressor of 'CONSTANS' expression. The stability of CDF2 is controlled by 'GIGANTEA' and redundantly by ADO3, ADO2 and/or ADO1. PMID:19619493
AAGGA	1372	+	1	CDF2 DOF5.2, At5g39660	Dof	A. thaliana	Highly expressed at the beginning of the light period, then decreases, reaching a minimum between 16 and 29 hours after dawn before rising again at the end of the day. Regulated at the protein level by ADO3 and GI pos-transcriptionally. PMID:19619493	Regulates a photoperiodic flowering response. Transcriptional repressor of 'CONSTANS' expression. The stability of CDF2 is controlled by 'GIGANTEA' and redundantly by ADO3, ADO2 and/or ADO1. PMID:19619493
AAAGA	1413	+	1	CDF2 DOF5.2, At5g39660	Dof	A. thaliana	Highly expressed at the beginning of the light period, then decreases, reaching a minimum between 16 and 29 hours after dawn before rising again at the end of the day. Regulated at the protein level by ADO3 and GI pos-transcriptionally. PMID:19619493	Regulates a photoperiodic flowering response. Transcriptional repressor of 'CONSTANS' expression. The stability of CDF2 is controlled by 'GIGANTEA' and redundantly by ADO3, ADO2 and/or ADO1. PMID:19619493
AAAGA	1420	+	1	CDF2 DOF5.2, At5g39660	Dof	A. thaliana	Highly expressed at the beginning of the light period, then decreases, reaching a minimum between 16 and 29 hours after dawn before rising again at the end of the day. Regulated at the protein level by ADO3 and GI pos-transcriptionally. PMID:19619493	Regulates a photoperiodic flowering response. Transcriptional repressor of 'CONSTANS' expression. The stability of CDF2 is controlled by 'GIGANTEA' and redundantly by ADO3, ADO2 and/or ADO1. PMID:19619493
CTTTT	613	-	1	DOF5.3 At5g60200	Dof	A. thaliana
CTTTT	882	-	1	DOF5.3 At5g60200	Dof	A. thaliana
GCCTT	79	-	1	DOF5.3 At5g60200	Dof	A. thaliana
CCTTT	80	-	1	DOF5.3 At5g60200	Dof	A. thaliana
AAAGT	109	+	1	DOF5.3 At5g60200	Dof	A. thaliana
ACCTT	158	-	1	DOF5.3 At5g60200	Dof	A. thaliana
ACCTT	184	-	1	DOF5.3 At5g60200	Dof	A. thaliana
TCTTT	252	-	1	DOF5.3 At5g60200	Dof	A. thaliana
TCCTT	275	-	1	DOF5.3 At5g60200	Dof	A. thaliana
TCTTT	328	-	1	DOF5.3 At5g60200	Dof	A. thaliana
TCCTT	338	-	1	DOF5.3 At5g60200	Dof	A. thaliana
GCTTT	369	-	1	DOF5.3 At5g60200	Dof	A. thaliana
ACTTT	382	-	1	DOF5.3 At5g60200	Dof	A. thaliana
AAAGC	400	+	1	DOF5.3 At5g60200	Dof	A. thaliana
ACTTT	509	-	1	DOF5.3 At5g60200	Dof	A. thaliana
AAAGC	571	+	1	DOF5.3 At5g60200	Dof	A. thaliana
TCTTT	586	-	1	DOF5.3 At5g60200	Dof	A. thaliana
ACCTT	605	-	1	DOF5.3 At5g60200	Dof	A. thaliana
ACTTT	612	-	1	DOF5.3 At5g60200	Dof	A. thaliana
TCCTT	806	-	1	DOF5.3 At5g60200	Dof	A. thaliana
CCTTT	807	-	1	DOF5.3 At5g60200	Dof	A. thaliana
TCTTT	874	-	1	DOF5.3 At5g60200	Dof	A. thaliana
ACTTT	881	-	1	DOF5.3 At5g60200	Dof	A. thaliana
AAAGA	939	+	1	DOF5.3 At5g60200	Dof	A. thaliana
AAAGT	982	+	1	DOF5.3 At5g60200	Dof	A. thaliana
ACTTT	1021	-	1	DOF5.3 At5g60200	Dof	A. thaliana
AAAGG	1030	+	1	DOF5.3 At5g60200	Dof	A. thaliana
AAGGG	1031	+	1	DOF5.3 At5g60200	Dof	A. thaliana
TCCTT	1156	-	1	DOF5.3 At5g60200	Dof	A. thaliana
AAAGG	1289	+	1	DOF5.3 At5g60200	Dof	A. thaliana
AAGGC	1290	+	1	DOF5.3 At5g60200	Dof	A. thaliana
ACTTT	1297	-	1	DOF5.3 At5g60200	Dof	A. thaliana
AAAGG	1371	+	1	DOF5.3 At5g60200	Dof	A. thaliana
AAGGA	1372	+	1	DOF5.3 At5g60200	Dof	A. thaliana
AAAGA	1413	+	1	DOF5.3 At5g60200	Dof	A. thaliana
AAAGA	1420	+	1	DOF5.3 At5g60200	Dof	A. thaliana
CGTTA	685	-	1	DOF5.4 OBP4, At5g60850	Dof	A. thaliana		Enhances the DNA binding of OBF transcription factors to OCS elements.
AACGT	286	+	0.97	DOF5.4 OBP4, At5g60850	Dof	A. thaliana		Enhances the DNA binding of OBF transcription factors to OCS elements.
AACGT	1184	+	0.97	DOF5.4 OBP4, At5g60850	Dof	A. thaliana		Enhances the DNA binding of OBF transcription factors to OCS elements.
ACGTT	289	-	0.97	DOF5.4 OBP4, At5g60850	Dof	A. thaliana		Enhances the DNA binding of OBF transcription factors to OCS elements.
ACGTT	1187	-	0.97	DOF5.4 OBP4, At5g60850	Dof	A. thaliana		Enhances the DNA binding of OBF transcription factors to OCS elements.
GCCTT	79	-	1	DOF5.4 OBP4, At5g60850	Dof	A. thaliana		Enhances the DNA binding of OBF transcription factors to OCS elements.
CCTTT	80	-	1	DOF5.4 OBP4, At5g60850	Dof	A. thaliana		Enhances the DNA binding of OBF transcription factors to OCS elements.
AAAGT	109	+	1	DOF5.4 OBP4, At5g60850	Dof	A. thaliana		Enhances the DNA binding of OBF transcription factors to OCS elements.
ACCTT	158	-	1	DOF5.4 OBP4, At5g60850	Dof	A. thaliana		Enhances the DNA binding of OBF transcription factors to OCS elements.
ACCTT	184	-	1	DOF5.4 OBP4, At5g60850	Dof	A. thaliana		Enhances the DNA binding of OBF transcription factors to OCS elements.
TCTTT	252	-	1	DOF5.4 OBP4, At5g60850	Dof	A. thaliana		Enhances the DNA binding of OBF transcription factors to OCS elements.
TCCTT	275	-	1	DOF5.4 OBP4, At5g60850	Dof	A. thaliana		Enhances the DNA binding of OBF transcription factors to OCS elements.
TCTTT	328	-	1	DOF5.4 OBP4, At5g60850	Dof	A. thaliana		Enhances the DNA binding of OBF transcription factors to OCS elements.
TCCTT	338	-	1	DOF5.4 OBP4, At5g60850	Dof	A. thaliana		Enhances the DNA binding of OBF transcription factors to OCS elements.
GCTTT	369	-	1	DOF5.4 OBP4, At5g60850	Dof	A. thaliana		Enhances the DNA binding of OBF transcription factors to OCS elements.
ACTTT	382	-	1	DOF5.4 OBP4, At5g60850	Dof	A. thaliana		Enhances the DNA binding of OBF transcription factors to OCS elements.
AAAGC	400	+	1	DOF5.4 OBP4, At5g60850	Dof	A. thaliana		Enhances the DNA binding of OBF transcription factors to OCS elements.
ACTTT	509	-	1	DOF5.4 OBP4, At5g60850	Dof	A. thaliana		Enhances the DNA binding of OBF transcription factors to OCS elements.
AAAGC	571	+	1	DOF5.4 OBP4, At5g60850	Dof	A. thaliana		Enhances the DNA binding of OBF transcription factors to OCS elements.
TCTTT	586	-	1	DOF5.4 OBP4, At5g60850	Dof	A. thaliana		Enhances the DNA binding of OBF transcription factors to OCS elements.
ACCTT	605	-	1	DOF5.4 OBP4, At5g60850	Dof	A. thaliana		Enhances the DNA binding of OBF transcription factors to OCS elements.
ACTTT	612	-	1	DOF5.4 OBP4, At5g60850	Dof	A. thaliana		Enhances the DNA binding of OBF transcription factors to OCS elements.
TCCTT	806	-	1	DOF5.4 OBP4, At5g60850	Dof	A. thaliana		Enhances the DNA binding of OBF transcription factors to OCS elements.
CCTTT	807	-	1	DOF5.4 OBP4, At5g60850	Dof	A. thaliana		Enhances the DNA binding of OBF transcription factors to OCS elements.
TCTTT	874	-	1	DOF5.4 OBP4, At5g60850	Dof	A. thaliana		Enhances the DNA binding of OBF transcription factors to OCS elements.
ACTTT	881	-	1	DOF5.4 OBP4, At5g60850	Dof	A. thaliana		Enhances the DNA binding of OBF transcription factors to OCS elements.
AAAGA	939	+	1	DOF5.4 OBP4, At5g60850	Dof	A. thaliana		Enhances the DNA binding of OBF transcription factors to OCS elements.
AAAGT	982	+	1	DOF5.4 OBP4, At5g60850	Dof	A. thaliana		Enhances the DNA binding of OBF transcription factors to OCS elements.
ACTTT	1021	-	1	DOF5.4 OBP4, At5g60850	Dof	A. thaliana		Enhances the DNA binding of OBF transcription factors to OCS elements.
AAAGG	1030	+	1	DOF5.4 OBP4, At5g60850	Dof	A. thaliana		Enhances the DNA binding of OBF transcription factors to OCS elements.
AAGGG	1031	+	1	DOF5.4 OBP4, At5g60850	Dof	A. thaliana		Enhances the DNA binding of OBF transcription factors to OCS elements.
TCCTT	1156	-	1	DOF5.4 OBP4, At5g60850	Dof	A. thaliana		Enhances the DNA binding of OBF transcription factors to OCS elements.
AAAGG	1289	+	1	DOF5.4 OBP4, At5g60850	Dof	A. thaliana		Enhances the DNA binding of OBF transcription factors to OCS elements.
AAGGC	1290	+	1	DOF5.4 OBP4, At5g60850	Dof	A. thaliana		Enhances the DNA binding of OBF transcription factors to OCS elements.
ACTTT	1297	-	1	DOF5.4 OBP4, At5g60850	Dof	A. thaliana		Enhances the DNA binding of OBF transcription factors to OCS elements.
AAAGG	1371	+	1	DOF5.4 OBP4, At5g60850	Dof	A. thaliana		Enhances the DNA binding of OBF transcription factors to OCS elements.
AAGGA	1372	+	1	DOF5.4 OBP4, At5g60850	Dof	A. thaliana		Enhances the DNA binding of OBF transcription factors to OCS elements.
AAAGA	1413	+	1	DOF5.4 OBP4, At5g60850	Dof	A. thaliana		Enhances the DNA binding of OBF transcription factors to OCS elements.
AAAGA	1420	+	1	DOF5.4 OBP4, At5g60850	Dof	A. thaliana		Enhances the DNA binding of OBF transcription factors to OCS elements.
CTTTT	382	-	1	DOF5.6 At5g62940	Dof	A. thaliana
CTTTT	612	-	1	DOF5.6 At5g62940	Dof	A. thaliana
CTTTT	881	-	1	DOF5.6 At5g62940	Dof	A. thaliana
CTTTT	1021	-	1	DOF5.6 At5g62940	Dof	A. thaliana
CTTTT	1297	-	1	DOF5.6 At5g62940	Dof	A. thaliana
GCCTT	79	-	1	DOF5.6 At5g62940	Dof	A. thaliana
CCTTT	80	-	1	DOF5.6 At5g62940	Dof	A. thaliana
AAAGT	109	+	1	DOF5.6 At5g62940	Dof	A. thaliana
ACCTT	158	-	1	DOF5.6 At5g62940	Dof	A. thaliana
ACCTT	184	-	1	DOF5.6 At5g62940	Dof	A. thaliana
TCTTT	252	-	1	DOF5.6 At5g62940	Dof	A. thaliana
TCCTT	275	-	1	DOF5.6 At5g62940	Dof	A. thaliana
TCTTT	328	-	1	DOF5.6 At5g62940	Dof	A. thaliana
TCCTT	338	-	1	DOF5.6 At5g62940	Dof	A. thaliana
GCTTT	369	-	1	DOF5.6 At5g62940	Dof	A. thaliana
ACTTT	382	-	1	DOF5.6 At5g62940	Dof	A. thaliana
AAAGC	400	+	1	DOF5.6 At5g62940	Dof	A. thaliana
ACTTT	509	-	1	DOF5.6 At5g62940	Dof	A. thaliana
AAAGC	571	+	1	DOF5.6 At5g62940	Dof	A. thaliana
TCTTT	586	-	1	DOF5.6 At5g62940	Dof	A. thaliana
ACCTT	605	-	1	DOF5.6 At5g62940	Dof	A. thaliana
ACTTT	612	-	1	DOF5.6 At5g62940	Dof	A. thaliana
TCCTT	806	-	1	DOF5.6 At5g62940	Dof	A. thaliana
CCTTT	807	-	1	DOF5.6 At5g62940	Dof	A. thaliana
TCTTT	874	-	1	DOF5.6 At5g62940	Dof	A. thaliana
ACTTT	881	-	1	DOF5.6 At5g62940	Dof	A. thaliana
AAAGA	939	+	1	DOF5.6 At5g62940	Dof	A. thaliana
AAAGT	982	+	1	DOF5.6 At5g62940	Dof	A. thaliana
ACTTT	1021	-	1	DOF5.6 At5g62940	Dof	A. thaliana
AAAGG	1030	+	1	DOF5.6 At5g62940	Dof	A. thaliana
AAGGG	1031	+	1	DOF5.6 At5g62940	Dof	A. thaliana
TCCTT	1156	-	1	DOF5.6 At5g62940	Dof	A. thaliana
AAAGG	1289	+	1	DOF5.6 At5g62940	Dof	A. thaliana
AAGGC	1290	+	1	DOF5.6 At5g62940	Dof	A. thaliana
ACTTT	1297	-	1	DOF5.6 At5g62940	Dof	A. thaliana
AAAGG	1371	+	1	DOF5.6 At5g62940	Dof	A. thaliana
AAGGA	1372	+	1	DOF5.6 At5g62940	Dof	A. thaliana
AAAGA	1413	+	1	DOF5.6 At5g62940	Dof	A. thaliana
AAAGA	1420	+	1	DOF5.6 At5g62940	Dof	A. thaliana
TCTTT	871	-	0.99	DOF5.7 At5g65590	Dof	A. thaliana		regulation of cell wall pectin metabolic process, stomatal movement (23453954)
AAAGA	1418	+	1	DOF5.7 At5g65590	Dof	A. thaliana		regulation of cell wall pectin metabolic process, stomatal movement (23453954)
CGTTA	685	+	0.88	DOF5.7 At5g65590	Dof	A. thaliana		regulation of cell wall pectin metabolic process, stomatal movement (23453954)
GCCTT	79	-	1	DOF5.7 At5g65590	Dof	A. thaliana		regulation of cell wall pectin metabolic process, stomatal movement (23453954)
CCTTT	80	-	1	DOF5.7 At5g65590	Dof	A. thaliana		regulation of cell wall pectin metabolic process, stomatal movement (23453954)
AAAGT	109	+	1	DOF5.7 At5g65590	Dof	A. thaliana		regulation of cell wall pectin metabolic process, stomatal movement (23453954)
ACCTT	158	-	1	DOF5.7 At5g65590	Dof	A. thaliana		regulation of cell wall pectin metabolic process, stomatal movement (23453954)
ACCTT	184	-	1	DOF5.7 At5g65590	Dof	A. thaliana		regulation of cell wall pectin metabolic process, stomatal movement (23453954)
TCTTT	252	-	1	DOF5.7 At5g65590	Dof	A. thaliana		regulation of cell wall pectin metabolic process, stomatal movement (23453954)
TCCTT	275	-	1	DOF5.7 At5g65590	Dof	A. thaliana		regulation of cell wall pectin metabolic process, stomatal movement (23453954)
TCTTT	328	-	1	DOF5.7 At5g65590	Dof	A. thaliana		regulation of cell wall pectin metabolic process, stomatal movement (23453954)
TCCTT	338	-	1	DOF5.7 At5g65590	Dof	A. thaliana		regulation of cell wall pectin metabolic process, stomatal movement (23453954)
GCTTT	369	-	1	DOF5.7 At5g65590	Dof	A. thaliana		regulation of cell wall pectin metabolic process, stomatal movement (23453954)
ACTTT	382	-	1	DOF5.7 At5g65590	Dof	A. thaliana		regulation of cell wall pectin metabolic process, stomatal movement (23453954)
AAAGC	400	+	1	DOF5.7 At5g65590	Dof	A. thaliana		regulation of cell wall pectin metabolic process, stomatal movement (23453954)
ACTTT	509	-	1	DOF5.7 At5g65590	Dof	A. thaliana		regulation of cell wall pectin metabolic process, stomatal movement (23453954)
AAAGC	571	+	1	DOF5.7 At5g65590	Dof	A. thaliana		regulation of cell wall pectin metabolic process, stomatal movement (23453954)
TCTTT	586	-	1	DOF5.7 At5g65590	Dof	A. thaliana		regulation of cell wall pectin metabolic process, stomatal movement (23453954)
ACCTT	605	-	1	DOF5.7 At5g65590	Dof	A. thaliana		regulation of cell wall pectin metabolic process, stomatal movement (23453954)
ACTTT	612	-	1	DOF5.7 At5g65590	Dof	A. thaliana		regulation of cell wall pectin metabolic process, stomatal movement (23453954)
TCCTT	806	-	1	DOF5.7 At5g65590	Dof	A. thaliana		regulation of cell wall pectin metabolic process, stomatal movement (23453954)
CCTTT	807	-	1	DOF5.7 At5g65590	Dof	A. thaliana		regulation of cell wall pectin metabolic process, stomatal movement (23453954)
TCTTT	874	-	1	DOF5.7 At5g65590	Dof	A. thaliana		regulation of cell wall pectin metabolic process, stomatal movement (23453954)
ACTTT	881	-	1	DOF5.7 At5g65590	Dof	A. thaliana		regulation of cell wall pectin metabolic process, stomatal movement (23453954)
AAAGA	939	+	1	DOF5.7 At5g65590	Dof	A. thaliana		regulation of cell wall pectin metabolic process, stomatal movement (23453954)
AAAGT	982	+	1	DOF5.7 At5g65590	Dof	A. thaliana		regulation of cell wall pectin metabolic process, stomatal movement (23453954)
ACTTT	1021	-	1	DOF5.7 At5g65590	Dof	A. thaliana		regulation of cell wall pectin metabolic process, stomatal movement (23453954)
AAAGG	1030	+	1	DOF5.7 At5g65590	Dof	A. thaliana		regulation of cell wall pectin metabolic process, stomatal movement (23453954)
AAGGG	1031	+	1	DOF5.7 At5g65590	Dof	A. thaliana		regulation of cell wall pectin metabolic process, stomatal movement (23453954)
TCCTT	1156	-	1	DOF5.7 At5g65590	Dof	A. thaliana		regulation of cell wall pectin metabolic process, stomatal movement (23453954)
AAAGG	1289	+	1	DOF5.7 At5g65590	Dof	A. thaliana		regulation of cell wall pectin metabolic process, stomatal movement (23453954)
AAGGC	1290	+	1	DOF5.7 At5g65590	Dof	A. thaliana		regulation of cell wall pectin metabolic process, stomatal movement (23453954)
ACTTT	1297	-	1	DOF5.7 At5g65590	Dof	A. thaliana		regulation of cell wall pectin metabolic process, stomatal movement (23453954)
AAAGG	1371	+	1	DOF5.7 At5g65590	Dof	A. thaliana		regulation of cell wall pectin metabolic process, stomatal movement (23453954)
AAGGA	1372	+	1	DOF5.7 At5g65590	Dof	A. thaliana		regulation of cell wall pectin metabolic process, stomatal movement (23453954)
AAAGA	1413	+	1	DOF5.7 At5g65590	Dof	A. thaliana		regulation of cell wall pectin metabolic process, stomatal movement (23453954)
AAAGA	1420	+	1	DOF5.7 At5g65590	Dof	A. thaliana		regulation of cell wall pectin metabolic process, stomatal movement (23453954)
GCCTT	79	-	1	DOF1.5 COG1, At1g29160	Dof	A. thaliana	Induction by red or far-red light. Circadian-regulation. The transcript level rises progressively from dawn and decreases during the night. PMID:19619493	Transcription factor that binds specifically to a 5'-AA[AG]G-3' consensus core sequence. Acts as a negative regulator in the phytochrome-mediated light responses. Controls phyB-mediated end-of-day response and the phyA-mediated anthocyanin accumulation. Not involved in direct flowering time regulation. PMID:19619493 seed coat development 27227784
CCTTT	80	-	1	DOF1.5 COG1, At1g29160	Dof	A. thaliana	Induction by red or far-red light. Circadian-regulation. The transcript level rises progressively from dawn and decreases during the night. PMID:19619493	Transcription factor that binds specifically to a 5'-AA[AG]G-3' consensus core sequence. Acts as a negative regulator in the phytochrome-mediated light responses. Controls phyB-mediated end-of-day response and the phyA-mediated anthocyanin accumulation. Not involved in direct flowering time regulation. PMID:19619493 seed coat development 27227784
AAAGT	109	+	1	DOF1.5 COG1, At1g29160	Dof	A. thaliana	Induction by red or far-red light. Circadian-regulation. The transcript level rises progressively from dawn and decreases during the night. PMID:19619493	Transcription factor that binds specifically to a 5'-AA[AG]G-3' consensus core sequence. Acts as a negative regulator in the phytochrome-mediated light responses. Controls phyB-mediated end-of-day response and the phyA-mediated anthocyanin accumulation. Not involved in direct flowering time regulation. PMID:19619493 seed coat development 27227784
ACCTT	158	-	1	DOF1.5 COG1, At1g29160	Dof	A. thaliana	Induction by red or far-red light. Circadian-regulation. The transcript level rises progressively from dawn and decreases during the night. PMID:19619493	Transcription factor that binds specifically to a 5'-AA[AG]G-3' consensus core sequence. Acts as a negative regulator in the phytochrome-mediated light responses. Controls phyB-mediated end-of-day response and the phyA-mediated anthocyanin accumulation. Not involved in direct flowering time regulation. PMID:19619493 seed coat development 27227784
ACCTT	184	-	1	DOF1.5 COG1, At1g29160	Dof	A. thaliana	Induction by red or far-red light. Circadian-regulation. The transcript level rises progressively from dawn and decreases during the night. PMID:19619493	Transcription factor that binds specifically to a 5'-AA[AG]G-3' consensus core sequence. Acts as a negative regulator in the phytochrome-mediated light responses. Controls phyB-mediated end-of-day response and the phyA-mediated anthocyanin accumulation. Not involved in direct flowering time regulation. PMID:19619493 seed coat development 27227784
TCTTT	252	-	1	DOF1.5 COG1, At1g29160	Dof	A. thaliana	Induction by red or far-red light. Circadian-regulation. The transcript level rises progressively from dawn and decreases during the night. PMID:19619493	Transcription factor that binds specifically to a 5'-AA[AG]G-3' consensus core sequence. Acts as a negative regulator in the phytochrome-mediated light responses. Controls phyB-mediated end-of-day response and the phyA-mediated anthocyanin accumulation. Not involved in direct flowering time regulation. PMID:19619493 seed coat development 27227784
TCCTT	275	-	1	DOF1.5 COG1, At1g29160	Dof	A. thaliana	Induction by red or far-red light. Circadian-regulation. The transcript level rises progressively from dawn and decreases during the night. PMID:19619493	Transcription factor that binds specifically to a 5'-AA[AG]G-3' consensus core sequence. Acts as a negative regulator in the phytochrome-mediated light responses. Controls phyB-mediated end-of-day response and the phyA-mediated anthocyanin accumulation. Not involved in direct flowering time regulation. PMID:19619493 seed coat development 27227784
TCTTT	328	-	1	DOF1.5 COG1, At1g29160	Dof	A. thaliana	Induction by red or far-red light. Circadian-regulation. The transcript level rises progressively from dawn and decreases during the night. PMID:19619493	Transcription factor that binds specifically to a 5'-AA[AG]G-3' consensus core sequence. Acts as a negative regulator in the phytochrome-mediated light responses. Controls phyB-mediated end-of-day response and the phyA-mediated anthocyanin accumulation. Not involved in direct flowering time regulation. PMID:19619493 seed coat development 27227784
TCCTT	338	-	1	DOF1.5 COG1, At1g29160	Dof	A. thaliana	Induction by red or far-red light. Circadian-regulation. The transcript level rises progressively from dawn and decreases during the night. PMID:19619493	Transcription factor that binds specifically to a 5'-AA[AG]G-3' consensus core sequence. Acts as a negative regulator in the phytochrome-mediated light responses. Controls phyB-mediated end-of-day response and the phyA-mediated anthocyanin accumulation. Not involved in direct flowering time regulation. PMID:19619493 seed coat development 27227784
GCTTT	369	-	1	DOF1.5 COG1, At1g29160	Dof	A. thaliana	Induction by red or far-red light. Circadian-regulation. The transcript level rises progressively from dawn and decreases during the night. PMID:19619493	Transcription factor that binds specifically to a 5'-AA[AG]G-3' consensus core sequence. Acts as a negative regulator in the phytochrome-mediated light responses. Controls phyB-mediated end-of-day response and the phyA-mediated anthocyanin accumulation. Not involved in direct flowering time regulation. PMID:19619493 seed coat development 27227784
ACTTT	382	-	1	DOF1.5 COG1, At1g29160	Dof	A. thaliana	Induction by red or far-red light. Circadian-regulation. The transcript level rises progressively from dawn and decreases during the night. PMID:19619493	Transcription factor that binds specifically to a 5'-AA[AG]G-3' consensus core sequence. Acts as a negative regulator in the phytochrome-mediated light responses. Controls phyB-mediated end-of-day response and the phyA-mediated anthocyanin accumulation. Not involved in direct flowering time regulation. PMID:19619493 seed coat development 27227784
AAAGC	400	+	1	DOF1.5 COG1, At1g29160	Dof	A. thaliana	Induction by red or far-red light. Circadian-regulation. The transcript level rises progressively from dawn and decreases during the night. PMID:19619493	Transcription factor that binds specifically to a 5'-AA[AG]G-3' consensus core sequence. Acts as a negative regulator in the phytochrome-mediated light responses. Controls phyB-mediated end-of-day response and the phyA-mediated anthocyanin accumulation. Not involved in direct flowering time regulation. PMID:19619493 seed coat development 27227784
ACTTT	509	-	1	DOF1.5 COG1, At1g29160	Dof	A. thaliana	Induction by red or far-red light. Circadian-regulation. The transcript level rises progressively from dawn and decreases during the night. PMID:19619493	Transcription factor that binds specifically to a 5'-AA[AG]G-3' consensus core sequence. Acts as a negative regulator in the phytochrome-mediated light responses. Controls phyB-mediated end-of-day response and the phyA-mediated anthocyanin accumulation. Not involved in direct flowering time regulation. PMID:19619493 seed coat development 27227784
AAAGC	571	+	1	DOF1.5 COG1, At1g29160	Dof	A. thaliana	Induction by red or far-red light. Circadian-regulation. The transcript level rises progressively from dawn and decreases during the night. PMID:19619493	Transcription factor that binds specifically to a 5'-AA[AG]G-3' consensus core sequence. Acts as a negative regulator in the phytochrome-mediated light responses. Controls phyB-mediated end-of-day response and the phyA-mediated anthocyanin accumulation. Not involved in direct flowering time regulation. PMID:19619493 seed coat development 27227784
TCTTT	586	-	1	DOF1.5 COG1, At1g29160	Dof	A. thaliana	Induction by red or far-red light. Circadian-regulation. The transcript level rises progressively from dawn and decreases during the night. PMID:19619493	Transcription factor that binds specifically to a 5'-AA[AG]G-3' consensus core sequence. Acts as a negative regulator in the phytochrome-mediated light responses. Controls phyB-mediated end-of-day response and the phyA-mediated anthocyanin accumulation. Not involved in direct flowering time regulation. PMID:19619493 seed coat development 27227784
ACCTT	605	-	1	DOF1.5 COG1, At1g29160	Dof	A. thaliana	Induction by red or far-red light. Circadian-regulation. The transcript level rises progressively from dawn and decreases during the night. PMID:19619493	Transcription factor that binds specifically to a 5'-AA[AG]G-3' consensus core sequence. Acts as a negative regulator in the phytochrome-mediated light responses. Controls phyB-mediated end-of-day response and the phyA-mediated anthocyanin accumulation. Not involved in direct flowering time regulation. PMID:19619493 seed coat development 27227784
ACTTT	612	-	1	DOF1.5 COG1, At1g29160	Dof	A. thaliana	Induction by red or far-red light. Circadian-regulation. The transcript level rises progressively from dawn and decreases during the night. PMID:19619493	Transcription factor that binds specifically to a 5'-AA[AG]G-3' consensus core sequence. Acts as a negative regulator in the phytochrome-mediated light responses. Controls phyB-mediated end-of-day response and the phyA-mediated anthocyanin accumulation. Not involved in direct flowering time regulation. PMID:19619493 seed coat development 27227784
TCCTT	806	-	1	DOF1.5 COG1, At1g29160	Dof	A. thaliana	Induction by red or far-red light. Circadian-regulation. The transcript level rises progressively from dawn and decreases during the night. PMID:19619493	Transcription factor that binds specifically to a 5'-AA[AG]G-3' consensus core sequence. Acts as a negative regulator in the phytochrome-mediated light responses. Controls phyB-mediated end-of-day response and the phyA-mediated anthocyanin accumulation. Not involved in direct flowering time regulation. PMID:19619493 seed coat development 27227784
CCTTT	807	-	1	DOF1.5 COG1, At1g29160	Dof	A. thaliana	Induction by red or far-red light. Circadian-regulation. The transcript level rises progressively from dawn and decreases during the night. PMID:19619493	Transcription factor that binds specifically to a 5'-AA[AG]G-3' consensus core sequence. Acts as a negative regulator in the phytochrome-mediated light responses. Controls phyB-mediated end-of-day response and the phyA-mediated anthocyanin accumulation. Not involved in direct flowering time regulation. PMID:19619493 seed coat development 27227784
TCTTT	874	-	1	DOF1.5 COG1, At1g29160	Dof	A. thaliana	Induction by red or far-red light. Circadian-regulation. The transcript level rises progressively from dawn and decreases during the night. PMID:19619493	Transcription factor that binds specifically to a 5'-AA[AG]G-3' consensus core sequence. Acts as a negative regulator in the phytochrome-mediated light responses. Controls phyB-mediated end-of-day response and the phyA-mediated anthocyanin accumulation. Not involved in direct flowering time regulation. PMID:19619493 seed coat development 27227784
ACTTT	881	-	1	DOF1.5 COG1, At1g29160	Dof	A. thaliana	Induction by red or far-red light. Circadian-regulation. The transcript level rises progressively from dawn and decreases during the night. PMID:19619493	Transcription factor that binds specifically to a 5'-AA[AG]G-3' consensus core sequence. Acts as a negative regulator in the phytochrome-mediated light responses. Controls phyB-mediated end-of-day response and the phyA-mediated anthocyanin accumulation. Not involved in direct flowering time regulation. PMID:19619493 seed coat development 27227784
AAAGA	939	+	1	DOF1.5 COG1, At1g29160	Dof	A. thaliana	Induction by red or far-red light. Circadian-regulation. The transcript level rises progressively from dawn and decreases during the night. PMID:19619493	Transcription factor that binds specifically to a 5'-AA[AG]G-3' consensus core sequence. Acts as a negative regulator in the phytochrome-mediated light responses. Controls phyB-mediated end-of-day response and the phyA-mediated anthocyanin accumulation. Not involved in direct flowering time regulation. PMID:19619493 seed coat development 27227784
AAAGT	982	+	1	DOF1.5 COG1, At1g29160	Dof	A. thaliana	Induction by red or far-red light. Circadian-regulation. The transcript level rises progressively from dawn and decreases during the night. PMID:19619493	Transcription factor that binds specifically to a 5'-AA[AG]G-3' consensus core sequence. Acts as a negative regulator in the phytochrome-mediated light responses. Controls phyB-mediated end-of-day response and the phyA-mediated anthocyanin accumulation. Not involved in direct flowering time regulation. PMID:19619493 seed coat development 27227784
ACTTT	1021	-	1	DOF1.5 COG1, At1g29160	Dof	A. thaliana	Induction by red or far-red light. Circadian-regulation. The transcript level rises progressively from dawn and decreases during the night. PMID:19619493	Transcription factor that binds specifically to a 5'-AA[AG]G-3' consensus core sequence. Acts as a negative regulator in the phytochrome-mediated light responses. Controls phyB-mediated end-of-day response and the phyA-mediated anthocyanin accumulation. Not involved in direct flowering time regulation. PMID:19619493 seed coat development 27227784
AAAGG	1030	+	1	DOF1.5 COG1, At1g29160	Dof	A. thaliana	Induction by red or far-red light. Circadian-regulation. The transcript level rises progressively from dawn and decreases during the night. PMID:19619493	Transcription factor that binds specifically to a 5'-AA[AG]G-3' consensus core sequence. Acts as a negative regulator in the phytochrome-mediated light responses. Controls phyB-mediated end-of-day response and the phyA-mediated anthocyanin accumulation. Not involved in direct flowering time regulation. PMID:19619493 seed coat development 27227784
AAGGG	1031	+	1	DOF1.5 COG1, At1g29160	Dof	A. thaliana	Induction by red or far-red light. Circadian-regulation. The transcript level rises progressively from dawn and decreases during the night. PMID:19619493	Transcription factor that binds specifically to a 5'-AA[AG]G-3' consensus core sequence. Acts as a negative regulator in the phytochrome-mediated light responses. Controls phyB-mediated end-of-day response and the phyA-mediated anthocyanin accumulation. Not involved in direct flowering time regulation. PMID:19619493 seed coat development 27227784
TCCTT	1156	-	1	DOF1.5 COG1, At1g29160	Dof	A. thaliana	Induction by red or far-red light. Circadian-regulation. The transcript level rises progressively from dawn and decreases during the night. PMID:19619493	Transcription factor that binds specifically to a 5'-AA[AG]G-3' consensus core sequence. Acts as a negative regulator in the phytochrome-mediated light responses. Controls phyB-mediated end-of-day response and the phyA-mediated anthocyanin accumulation. Not involved in direct flowering time regulation. PMID:19619493 seed coat development 27227784
AAAGG	1289	+	1	DOF1.5 COG1, At1g29160	Dof	A. thaliana	Induction by red or far-red light. Circadian-regulation. The transcript level rises progressively from dawn and decreases during the night. PMID:19619493	Transcription factor that binds specifically to a 5'-AA[AG]G-3' consensus core sequence. Acts as a negative regulator in the phytochrome-mediated light responses. Controls phyB-mediated end-of-day response and the phyA-mediated anthocyanin accumulation. Not involved in direct flowering time regulation. PMID:19619493 seed coat development 27227784
AAGGC	1290	+	1	DOF1.5 COG1, At1g29160	Dof	A. thaliana	Induction by red or far-red light. Circadian-regulation. The transcript level rises progressively from dawn and decreases during the night. PMID:19619493	Transcription factor that binds specifically to a 5'-AA[AG]G-3' consensus core sequence. Acts as a negative regulator in the phytochrome-mediated light responses. Controls phyB-mediated end-of-day response and the phyA-mediated anthocyanin accumulation. Not involved in direct flowering time regulation. PMID:19619493 seed coat development 27227784
ACTTT	1297	-	1	DOF1.5 COG1, At1g29160	Dof	A. thaliana	Induction by red or far-red light. Circadian-regulation. The transcript level rises progressively from dawn and decreases during the night. PMID:19619493	Transcription factor that binds specifically to a 5'-AA[AG]G-3' consensus core sequence. Acts as a negative regulator in the phytochrome-mediated light responses. Controls phyB-mediated end-of-day response and the phyA-mediated anthocyanin accumulation. Not involved in direct flowering time regulation. PMID:19619493 seed coat development 27227784
AAAGG	1371	+	1	DOF1.5 COG1, At1g29160	Dof	A. thaliana	Induction by red or far-red light. Circadian-regulation. The transcript level rises progressively from dawn and decreases during the night. PMID:19619493	Transcription factor that binds specifically to a 5'-AA[AG]G-3' consensus core sequence. Acts as a negative regulator in the phytochrome-mediated light responses. Controls phyB-mediated end-of-day response and the phyA-mediated anthocyanin accumulation. Not involved in direct flowering time regulation. PMID:19619493 seed coat development 27227784
AAGGA	1372	+	1	DOF1.5 COG1, At1g29160	Dof	A. thaliana	Induction by red or far-red light. Circadian-regulation. The transcript level rises progressively from dawn and decreases during the night. PMID:19619493	Transcription factor that binds specifically to a 5'-AA[AG]G-3' consensus core sequence. Acts as a negative regulator in the phytochrome-mediated light responses. Controls phyB-mediated end-of-day response and the phyA-mediated anthocyanin accumulation. Not involved in direct flowering time regulation. PMID:19619493 seed coat development 27227784
AAAGA	1413	+	1	DOF1.5 COG1, At1g29160	Dof	A. thaliana	Induction by red or far-red light. Circadian-regulation. The transcript level rises progressively from dawn and decreases during the night. PMID:19619493	Transcription factor that binds specifically to a 5'-AA[AG]G-3' consensus core sequence. Acts as a negative regulator in the phytochrome-mediated light responses. Controls phyB-mediated end-of-day response and the phyA-mediated anthocyanin accumulation. Not involved in direct flowering time regulation. PMID:19619493 seed coat development 27227784
AAAGA	1420	+	1	DOF1.5 COG1, At1g29160	Dof	A. thaliana	Induction by red or far-red light. Circadian-regulation. The transcript level rises progressively from dawn and decreases during the night. PMID:19619493	Transcription factor that binds specifically to a 5'-AA[AG]G-3' consensus core sequence. Acts as a negative regulator in the phytochrome-mediated light responses. Controls phyB-mediated end-of-day response and the phyA-mediated anthocyanin accumulation. Not involved in direct flowering time regulation. PMID:19619493 seed coat development 27227784
GCCTT	79	-	1	DOF1.8 At1g64620	Dof	A. thaliana
CCTTT	80	-	1	DOF1.8 At1g64620	Dof	A. thaliana
AAAGT	109	+	1	DOF1.8 At1g64620	Dof	A. thaliana
ACCTT	158	-	1	DOF1.8 At1g64620	Dof	A. thaliana
ACCTT	184	-	1	DOF1.8 At1g64620	Dof	A. thaliana
TCTTT	252	-	1	DOF1.8 At1g64620	Dof	A. thaliana
TCCTT	275	-	1	DOF1.8 At1g64620	Dof	A. thaliana
TCTTT	328	-	1	DOF1.8 At1g64620	Dof	A. thaliana
TCCTT	338	-	1	DOF1.8 At1g64620	Dof	A. thaliana
GCTTT	369	-	1	DOF1.8 At1g64620	Dof	A. thaliana
ACTTT	382	-	1	DOF1.8 At1g64620	Dof	A. thaliana
AAAGC	400	+	1	DOF1.8 At1g64620	Dof	A. thaliana
ACTTT	509	-	1	DOF1.8 At1g64620	Dof	A. thaliana
AAAGC	571	+	1	DOF1.8 At1g64620	Dof	A. thaliana
TCTTT	586	-	1	DOF1.8 At1g64620	Dof	A. thaliana
ACCTT	605	-	1	DOF1.8 At1g64620	Dof	A. thaliana
ACTTT	612	-	1	DOF1.8 At1g64620	Dof	A. thaliana
TCCTT	806	-	1	DOF1.8 At1g64620	Dof	A. thaliana
CCTTT	807	-	1	DOF1.8 At1g64620	Dof	A. thaliana
TCTTT	874	-	1	DOF1.8 At1g64620	Dof	A. thaliana
ACTTT	881	-	1	DOF1.8 At1g64620	Dof	A. thaliana
AAAGA	939	+	1	DOF1.8 At1g64620	Dof	A. thaliana
AAAGT	982	+	1	DOF1.8 At1g64620	Dof	A. thaliana
ACTTT	1021	-	1	DOF1.8 At1g64620	Dof	A. thaliana
AAAGG	1030	+	1	DOF1.8 At1g64620	Dof	A. thaliana
AAGGG	1031	+	1	DOF1.8 At1g64620	Dof	A. thaliana
TCCTT	1156	-	1	DOF1.8 At1g64620	Dof	A. thaliana
AAAGG	1289	+	1	DOF1.8 At1g64620	Dof	A. thaliana
AAGGC	1290	+	1	DOF1.8 At1g64620	Dof	A. thaliana
ACTTT	1297	-	1	DOF1.8 At1g64620	Dof	A. thaliana
AAAGG	1371	+	1	DOF1.8 At1g64620	Dof	A. thaliana
AAGGA	1372	+	1	DOF1.8 At1g64620	Dof	A. thaliana
AAAGA	1413	+	1	DOF1.8 At1g64620	Dof	A. thaliana
AAAGA	1420	+	1	DOF1.8 At1g64620	Dof	A. thaliana
GCCTT	79	-	1	DOF3.2 DOF6, At3g45610	Dof	A. thaliana
CCTTT	80	-	1	DOF3.2 DOF6, At3g45610	Dof	A. thaliana
AAAGT	109	+	1	DOF3.2 DOF6, At3g45610	Dof	A. thaliana
ACCTT	158	-	1	DOF3.2 DOF6, At3g45610	Dof	A. thaliana
ACCTT	184	-	1	DOF3.2 DOF6, At3g45610	Dof	A. thaliana
TCTTT	252	-	1	DOF3.2 DOF6, At3g45610	Dof	A. thaliana
TCCTT	275	-	1	DOF3.2 DOF6, At3g45610	Dof	A. thaliana
TCTTT	328	-	1	DOF3.2 DOF6, At3g45610	Dof	A. thaliana
TCCTT	338	-	1	DOF3.2 DOF6, At3g45610	Dof	A. thaliana
GCTTT	369	-	1	DOF3.2 DOF6, At3g45610	Dof	A. thaliana
ACTTT	382	-	1	DOF3.2 DOF6, At3g45610	Dof	A. thaliana
AAAGC	400	+	1	DOF3.2 DOF6, At3g45610	Dof	A. thaliana
ACTTT	509	-	1	DOF3.2 DOF6, At3g45610	Dof	A. thaliana
AAAGC	571	+	1	DOF3.2 DOF6, At3g45610	Dof	A. thaliana
TCTTT	586	-	1	DOF3.2 DOF6, At3g45610	Dof	A. thaliana
ACCTT	605	-	1	DOF3.2 DOF6, At3g45610	Dof	A. thaliana
ACTTT	612	-	1	DOF3.2 DOF6, At3g45610	Dof	A. thaliana
TCCTT	806	-	1	DOF3.2 DOF6, At3g45610	Dof	A. thaliana
CCTTT	807	-	1	DOF3.2 DOF6, At3g45610	Dof	A. thaliana
TCTTT	874	-	1	DOF3.2 DOF6, At3g45610	Dof	A. thaliana
ACTTT	881	-	1	DOF3.2 DOF6, At3g45610	Dof	A. thaliana
AAAGA	939	+	1	DOF3.2 DOF6, At3g45610	Dof	A. thaliana
AAAGT	982	+	1	DOF3.2 DOF6, At3g45610	Dof	A. thaliana
ACTTT	1021	-	1	DOF3.2 DOF6, At3g45610	Dof	A. thaliana
AAAGG	1030	+	1	DOF3.2 DOF6, At3g45610	Dof	A. thaliana
AAGGG	1031	+	1	DOF3.2 DOF6, At3g45610	Dof	A. thaliana
TCCTT	1156	-	1	DOF3.2 DOF6, At3g45610	Dof	A. thaliana
AAAGG	1289	+	1	DOF3.2 DOF6, At3g45610	Dof	A. thaliana
AAGGC	1290	+	1	DOF3.2 DOF6, At3g45610	Dof	A. thaliana
ACTTT	1297	-	1	DOF3.2 DOF6, At3g45610	Dof	A. thaliana
AAAGG	1371	+	1	DOF3.2 DOF6, At3g45610	Dof	A. thaliana
AAGGA	1372	+	1	DOF3.2 DOF6, At3g45610	Dof	A. thaliana
AAAGA	1413	+	1	DOF3.2 DOF6, At3g45610	Dof	A. thaliana
AAAGA	1420	+	1	DOF3.2 DOF6, At3g45610	Dof	A. thaliana
GCCTT	79	-	1	DOF1.1 OBP2, At1g07640	Dof	A. thaliana	Induction by auxin and salicylic acid (SA). PMID:10758484	Transcription factor that binds specifically to a 5'-AA[AG]G-3' consensus core sequence. Enhances the DNA binding of OBF transcription factors to OCS elements.
CCTTT	80	-	1	DOF1.1 OBP2, At1g07640	Dof	A. thaliana	Induction by auxin and salicylic acid (SA). PMID:10758484	Transcription factor that binds specifically to a 5'-AA[AG]G-3' consensus core sequence. Enhances the DNA binding of OBF transcription factors to OCS elements.
AAAGT	109	+	1	DOF1.1 OBP2, At1g07640	Dof	A. thaliana	Induction by auxin and salicylic acid (SA). PMID:10758484	Transcription factor that binds specifically to a 5'-AA[AG]G-3' consensus core sequence. Enhances the DNA binding of OBF transcription factors to OCS elements.
ACCTT	158	-	1	DOF1.1 OBP2, At1g07640	Dof	A. thaliana	Induction by auxin and salicylic acid (SA). PMID:10758484	Transcription factor that binds specifically to a 5'-AA[AG]G-3' consensus core sequence. Enhances the DNA binding of OBF transcription factors to OCS elements.
ACCTT	184	-	1	DOF1.1 OBP2, At1g07640	Dof	A. thaliana	Induction by auxin and salicylic acid (SA). PMID:10758484	Transcription factor that binds specifically to a 5'-AA[AG]G-3' consensus core sequence. Enhances the DNA binding of OBF transcription factors to OCS elements.
TCTTT	252	-	1	DOF1.1 OBP2, At1g07640	Dof	A. thaliana	Induction by auxin and salicylic acid (SA). PMID:10758484	Transcription factor that binds specifically to a 5'-AA[AG]G-3' consensus core sequence. Enhances the DNA binding of OBF transcription factors to OCS elements.
TCCTT	275	-	1	DOF1.1 OBP2, At1g07640	Dof	A. thaliana	Induction by auxin and salicylic acid (SA). PMID:10758484	Transcription factor that binds specifically to a 5'-AA[AG]G-3' consensus core sequence. Enhances the DNA binding of OBF transcription factors to OCS elements.
TCTTT	328	-	1	DOF1.1 OBP2, At1g07640	Dof	A. thaliana	Induction by auxin and salicylic acid (SA). PMID:10758484	Transcription factor that binds specifically to a 5'-AA[AG]G-3' consensus core sequence. Enhances the DNA binding of OBF transcription factors to OCS elements.
TCCTT	338	-	1	DOF1.1 OBP2, At1g07640	Dof	A. thaliana	Induction by auxin and salicylic acid (SA). PMID:10758484	Transcription factor that binds specifically to a 5'-AA[AG]G-3' consensus core sequence. Enhances the DNA binding of OBF transcription factors to OCS elements.
GCTTT	369	-	1	DOF1.1 OBP2, At1g07640	Dof	A. thaliana	Induction by auxin and salicylic acid (SA). PMID:10758484	Transcription factor that binds specifically to a 5'-AA[AG]G-3' consensus core sequence. Enhances the DNA binding of OBF transcription factors to OCS elements.
ACTTT	382	-	1	DOF1.1 OBP2, At1g07640	Dof	A. thaliana	Induction by auxin and salicylic acid (SA). PMID:10758484	Transcription factor that binds specifically to a 5'-AA[AG]G-3' consensus core sequence. Enhances the DNA binding of OBF transcription factors to OCS elements.
AAAGC	400	+	1	DOF1.1 OBP2, At1g07640	Dof	A. thaliana	Induction by auxin and salicylic acid (SA). PMID:10758484	Transcription factor that binds specifically to a 5'-AA[AG]G-3' consensus core sequence. Enhances the DNA binding of OBF transcription factors to OCS elements.
ACTTT	509	-	1	DOF1.1 OBP2, At1g07640	Dof	A. thaliana	Induction by auxin and salicylic acid (SA). PMID:10758484	Transcription factor that binds specifically to a 5'-AA[AG]G-3' consensus core sequence. Enhances the DNA binding of OBF transcription factors to OCS elements.
AAAGC	571	+	1	DOF1.1 OBP2, At1g07640	Dof	A. thaliana	Induction by auxin and salicylic acid (SA). PMID:10758484	Transcription factor that binds specifically to a 5'-AA[AG]G-3' consensus core sequence. Enhances the DNA binding of OBF transcription factors to OCS elements.
TCTTT	586	-	1	DOF1.1 OBP2, At1g07640	Dof	A. thaliana	Induction by auxin and salicylic acid (SA). PMID:10758484	Transcription factor that binds specifically to a 5'-AA[AG]G-3' consensus core sequence. Enhances the DNA binding of OBF transcription factors to OCS elements.
ACCTT	605	-	1	DOF1.1 OBP2, At1g07640	Dof	A. thaliana	Induction by auxin and salicylic acid (SA). PMID:10758484	Transcription factor that binds specifically to a 5'-AA[AG]G-3' consensus core sequence. Enhances the DNA binding of OBF transcription factors to OCS elements.
ACTTT	612	-	1	DOF1.1 OBP2, At1g07640	Dof	A. thaliana	Induction by auxin and salicylic acid (SA). PMID:10758484	Transcription factor that binds specifically to a 5'-AA[AG]G-3' consensus core sequence. Enhances the DNA binding of OBF transcription factors to OCS elements.
TCCTT	806	-	1	DOF1.1 OBP2, At1g07640	Dof	A. thaliana	Induction by auxin and salicylic acid (SA). PMID:10758484	Transcription factor that binds specifically to a 5'-AA[AG]G-3' consensus core sequence. Enhances the DNA binding of OBF transcription factors to OCS elements.
CCTTT	807	-	1	DOF1.1 OBP2, At1g07640	Dof	A. thaliana	Induction by auxin and salicylic acid (SA). PMID:10758484	Transcription factor that binds specifically to a 5'-AA[AG]G-3' consensus core sequence. Enhances the DNA binding of OBF transcription factors to OCS elements.
TCTTT	874	-	1	DOF1.1 OBP2, At1g07640	Dof	A. thaliana	Induction by auxin and salicylic acid (SA). PMID:10758484	Transcription factor that binds specifically to a 5'-AA[AG]G-3' consensus core sequence. Enhances the DNA binding of OBF transcription factors to OCS elements.
ACTTT	881	-	1	DOF1.1 OBP2, At1g07640	Dof	A. thaliana	Induction by auxin and salicylic acid (SA). PMID:10758484	Transcription factor that binds specifically to a 5'-AA[AG]G-3' consensus core sequence. Enhances the DNA binding of OBF transcription factors to OCS elements.
AAAGA	939	+	1	DOF1.1 OBP2, At1g07640	Dof	A. thaliana	Induction by auxin and salicylic acid (SA). PMID:10758484	Transcription factor that binds specifically to a 5'-AA[AG]G-3' consensus core sequence. Enhances the DNA binding of OBF transcription factors to OCS elements.
AAAGT	982	+	1	DOF1.1 OBP2, At1g07640	Dof	A. thaliana	Induction by auxin and salicylic acid (SA). PMID:10758484	Transcription factor that binds specifically to a 5'-AA[AG]G-3' consensus core sequence. Enhances the DNA binding of OBF transcription factors to OCS elements.
ACTTT	1021	-	1	DOF1.1 OBP2, At1g07640	Dof	A. thaliana	Induction by auxin and salicylic acid (SA). PMID:10758484	Transcription factor that binds specifically to a 5'-AA[AG]G-3' consensus core sequence. Enhances the DNA binding of OBF transcription factors to OCS elements.
AAAGG	1030	+	1	DOF1.1 OBP2, At1g07640	Dof	A. thaliana	Induction by auxin and salicylic acid (SA). PMID:10758484	Transcription factor that binds specifically to a 5'-AA[AG]G-3' consensus core sequence. Enhances the DNA binding of OBF transcription factors to OCS elements.
AAGGG	1031	+	1	DOF1.1 OBP2, At1g07640	Dof	A. thaliana	Induction by auxin and salicylic acid (SA). PMID:10758484	Transcription factor that binds specifically to a 5'-AA[AG]G-3' consensus core sequence. Enhances the DNA binding of OBF transcription factors to OCS elements.
TCCTT	1156	-	1	DOF1.1 OBP2, At1g07640	Dof	A. thaliana	Induction by auxin and salicylic acid (SA). PMID:10758484	Transcription factor that binds specifically to a 5'-AA[AG]G-3' consensus core sequence. Enhances the DNA binding of OBF transcription factors to OCS elements.
AAAGG	1289	+	1	DOF1.1 OBP2, At1g07640	Dof	A. thaliana	Induction by auxin and salicylic acid (SA). PMID:10758484	Transcription factor that binds specifically to a 5'-AA[AG]G-3' consensus core sequence. Enhances the DNA binding of OBF transcription factors to OCS elements.
AAGGC	1290	+	1	DOF1.1 OBP2, At1g07640	Dof	A. thaliana	Induction by auxin and salicylic acid (SA). PMID:10758484	Transcription factor that binds specifically to a 5'-AA[AG]G-3' consensus core sequence. Enhances the DNA binding of OBF transcription factors to OCS elements.
ACTTT	1297	-	1	DOF1.1 OBP2, At1g07640	Dof	A. thaliana	Induction by auxin and salicylic acid (SA). PMID:10758484	Transcription factor that binds specifically to a 5'-AA[AG]G-3' consensus core sequence. Enhances the DNA binding of OBF transcription factors to OCS elements.
AAAGG	1371	+	1	DOF1.1 OBP2, At1g07640	Dof	A. thaliana	Induction by auxin and salicylic acid (SA). PMID:10758484	Transcription factor that binds specifically to a 5'-AA[AG]G-3' consensus core sequence. Enhances the DNA binding of OBF transcription factors to OCS elements.
AAGGA	1372	+	1	DOF1.1 OBP2, At1g07640	Dof	A. thaliana	Induction by auxin and salicylic acid (SA). PMID:10758484	Transcription factor that binds specifically to a 5'-AA[AG]G-3' consensus core sequence. Enhances the DNA binding of OBF transcription factors to OCS elements.
AAAGA	1413	+	1	DOF1.1 OBP2, At1g07640	Dof	A. thaliana	Induction by auxin and salicylic acid (SA). PMID:10758484	Transcription factor that binds specifically to a 5'-AA[AG]G-3' consensus core sequence. Enhances the DNA binding of OBF transcription factors to OCS elements.
AAAGA	1420	+	1	DOF1.1 OBP2, At1g07640	Dof	A. thaliana	Induction by auxin and salicylic acid (SA). PMID:10758484	Transcription factor that binds specifically to a 5'-AA[AG]G-3' consensus core sequence. Enhances the DNA binding of OBF transcription factors to OCS elements.
GCCTT	79	-	1	DOF1.2 At1g21340	Dof	A. thaliana
CCTTT	80	-	1	DOF1.2 At1g21340	Dof	A. thaliana
AAAGT	109	+	1	DOF1.2 At1g21340	Dof	A. thaliana
ACCTT	158	-	1	DOF1.2 At1g21340	Dof	A. thaliana
ACCTT	184	-	1	DOF1.2 At1g21340	Dof	A. thaliana
TCTTT	252	-	1	DOF1.2 At1g21340	Dof	A. thaliana
TCCTT	275	-	1	DOF1.2 At1g21340	Dof	A. thaliana
TCTTT	328	-	1	DOF1.2 At1g21340	Dof	A. thaliana
TCCTT	338	-	1	DOF1.2 At1g21340	Dof	A. thaliana
GCTTT	369	-	1	DOF1.2 At1g21340	Dof	A. thaliana
ACTTT	382	-	1	DOF1.2 At1g21340	Dof	A. thaliana
AAAGC	400	+	1	DOF1.2 At1g21340	Dof	A. thaliana
ACTTT	509	-	1	DOF1.2 At1g21340	Dof	A. thaliana
AAAGC	571	+	1	DOF1.2 At1g21340	Dof	A. thaliana
TCTTT	586	-	1	DOF1.2 At1g21340	Dof	A. thaliana
ACCTT	605	-	1	DOF1.2 At1g21340	Dof	A. thaliana
ACTTT	612	-	1	DOF1.2 At1g21340	Dof	A. thaliana
TCCTT	806	-	1	DOF1.2 At1g21340	Dof	A. thaliana
CCTTT	807	-	1	DOF1.2 At1g21340	Dof	A. thaliana
TCTTT	874	-	1	DOF1.2 At1g21340	Dof	A. thaliana
ACTTT	881	-	1	DOF1.2 At1g21340	Dof	A. thaliana
AAAGA	939	+	1	DOF1.2 At1g21340	Dof	A. thaliana
AAAGT	982	+	1	DOF1.2 At1g21340	Dof	A. thaliana
ACTTT	1021	-	1	DOF1.2 At1g21340	Dof	A. thaliana
AAAGG	1030	+	1	DOF1.2 At1g21340	Dof	A. thaliana
AAGGG	1031	+	1	DOF1.2 At1g21340	Dof	A. thaliana
TCCTT	1156	-	1	DOF1.2 At1g21340	Dof	A. thaliana
AAAGG	1289	+	1	DOF1.2 At1g21340	Dof	A. thaliana
AAGGC	1290	+	1	DOF1.2 At1g21340	Dof	A. thaliana
ACTTT	1297	-	1	DOF1.2 At1g21340	Dof	A. thaliana
AAAGG	1371	+	1	DOF1.2 At1g21340	Dof	A. thaliana
AAGGA	1372	+	1	DOF1.2 At1g21340	Dof	A. thaliana
AAAGA	1413	+	1	DOF1.2 At1g21340	Dof	A. thaliana
AAAGA	1420	+	1	DOF1.2 At1g21340	Dof	A. thaliana
GCCTT	79	-	1	DOF1.3 At1g26790	Dof	A. thaliana
CCTTT	80	-	1	DOF1.3 At1g26790	Dof	A. thaliana
AAAGT	109	+	1	DOF1.3 At1g26790	Dof	A. thaliana
ACCTT	158	-	1	DOF1.3 At1g26790	Dof	A. thaliana
ACCTT	184	-	1	DOF1.3 At1g26790	Dof	A. thaliana
TCTTT	252	-	1	DOF1.3 At1g26790	Dof	A. thaliana
TCCTT	275	-	1	DOF1.3 At1g26790	Dof	A. thaliana
TCTTT	328	-	1	DOF1.3 At1g26790	Dof	A. thaliana
TCCTT	338	-	1	DOF1.3 At1g26790	Dof	A. thaliana
GCTTT	369	-	1	DOF1.3 At1g26790	Dof	A. thaliana
ACTTT	382	-	1	DOF1.3 At1g26790	Dof	A. thaliana
AAAGC	400	+	1	DOF1.3 At1g26790	Dof	A. thaliana
ACTTT	509	-	1	DOF1.3 At1g26790	Dof	A. thaliana
AAAGC	571	+	1	DOF1.3 At1g26790	Dof	A. thaliana
TCTTT	586	-	1	DOF1.3 At1g26790	Dof	A. thaliana
ACCTT	605	-	1	DOF1.3 At1g26790	Dof	A. thaliana
ACTTT	612	-	1	DOF1.3 At1g26790	Dof	A. thaliana
TCCTT	806	-	1	DOF1.3 At1g26790	Dof	A. thaliana
CCTTT	807	-	1	DOF1.3 At1g26790	Dof	A. thaliana
TCTTT	874	-	1	DOF1.3 At1g26790	Dof	A. thaliana
ACTTT	881	-	1	DOF1.3 At1g26790	Dof	A. thaliana
AAAGA	939	+	1	DOF1.3 At1g26790	Dof	A. thaliana
AAAGT	982	+	1	DOF1.3 At1g26790	Dof	A. thaliana
ACTTT	1021	-	1	DOF1.3 At1g26790	Dof	A. thaliana
AAAGG	1030	+	1	DOF1.3 At1g26790	Dof	A. thaliana
AAGGG	1031	+	1	DOF1.3 At1g26790	Dof	A. thaliana
TCCTT	1156	-	1	DOF1.3 At1g26790	Dof	A. thaliana
AAAGG	1289	+	1	DOF1.3 At1g26790	Dof	A. thaliana
AAGGC	1290	+	1	DOF1.3 At1g26790	Dof	A. thaliana
ACTTT	1297	-	1	DOF1.3 At1g26790	Dof	A. thaliana
AAAGG	1371	+	1	DOF1.3 At1g26790	Dof	A. thaliana
AAGGA	1372	+	1	DOF1.3 At1g26790	Dof	A. thaliana
AAAGA	1413	+	1	DOF1.3 At1g26790	Dof	A. thaliana
AAAGA	1420	+	1	DOF1.3 At1g26790	Dof	A. thaliana
GCCTT	79	-	1	DOF1.6 At1g47655	Dof	A. thaliana
CCTTT	80	-	1	DOF1.6 At1g47655	Dof	A. thaliana
AAAGT	109	+	1	DOF1.6 At1g47655	Dof	A. thaliana
ACCTT	158	-	1	DOF1.6 At1g47655	Dof	A. thaliana
ACCTT	184	-	1	DOF1.6 At1g47655	Dof	A. thaliana
TCTTT	252	-	1	DOF1.6 At1g47655	Dof	A. thaliana
TCCTT	275	-	1	DOF1.6 At1g47655	Dof	A. thaliana
TCTTT	328	-	1	DOF1.6 At1g47655	Dof	A. thaliana
TCCTT	338	-	1	DOF1.6 At1g47655	Dof	A. thaliana
GCTTT	369	-	1	DOF1.6 At1g47655	Dof	A. thaliana
ACTTT	382	-	1	DOF1.6 At1g47655	Dof	A. thaliana
AAAGC	400	+	1	DOF1.6 At1g47655	Dof	A. thaliana
ACTTT	509	-	1	DOF1.6 At1g47655	Dof	A. thaliana
AAAGC	571	+	1	DOF1.6 At1g47655	Dof	A. thaliana
TCTTT	586	-	1	DOF1.6 At1g47655	Dof	A. thaliana
ACCTT	605	-	1	DOF1.6 At1g47655	Dof	A. thaliana
ACTTT	612	-	1	DOF1.6 At1g47655	Dof	A. thaliana
TCCTT	806	-	1	DOF1.6 At1g47655	Dof	A. thaliana
CCTTT	807	-	1	DOF1.6 At1g47655	Dof	A. thaliana
TCTTT	874	-	1	DOF1.6 At1g47655	Dof	A. thaliana
ACTTT	881	-	1	DOF1.6 At1g47655	Dof	A. thaliana
AAAGA	939	+	1	DOF1.6 At1g47655	Dof	A. thaliana
AAAGT	982	+	1	DOF1.6 At1g47655	Dof	A. thaliana
ACTTT	1021	-	1	DOF1.6 At1g47655	Dof	A. thaliana
AAAGG	1030	+	1	DOF1.6 At1g47655	Dof	A. thaliana
AAGGG	1031	+	1	DOF1.6 At1g47655	Dof	A. thaliana
TCCTT	1156	-	1	DOF1.6 At1g47655	Dof	A. thaliana
AAAGG	1289	+	1	DOF1.6 At1g47655	Dof	A. thaliana
AAGGC	1290	+	1	DOF1.6 At1g47655	Dof	A. thaliana
ACTTT	1297	-	1	DOF1.6 At1g47655	Dof	A. thaliana
AAAGG	1371	+	1	DOF1.6 At1g47655	Dof	A. thaliana
AAGGA	1372	+	1	DOF1.6 At1g47655	Dof	A. thaliana
AAAGA	1413	+	1	DOF1.6 At1g47655	Dof	A. thaliana
AAAGA	1420	+	1	DOF1.6 At1g47655	Dof	A. thaliana
GCCTT	79	-	1	DOF1.7 ADOF1, At1g5170	Dof	A. thaliana	response to chitin 17722694
CCTTT	80	-	1	DOF1.7 ADOF1, At1g5170	Dof	A. thaliana	response to chitin 17722694
AAAGT	109	+	1	DOF1.7 ADOF1, At1g5170	Dof	A. thaliana	response to chitin 17722694
ACCTT	158	-	1	DOF1.7 ADOF1, At1g5170	Dof	A. thaliana	response to chitin 17722694
ACCTT	184	-	1	DOF1.7 ADOF1, At1g5170	Dof	A. thaliana	response to chitin 17722694
TCTTT	252	-	1	DOF1.7 ADOF1, At1g5170	Dof	A. thaliana	response to chitin 17722694
TCCTT	275	-	1	DOF1.7 ADOF1, At1g5170	Dof	A. thaliana	response to chitin 17722694
TCTTT	328	-	1	DOF1.7 ADOF1, At1g5170	Dof	A. thaliana	response to chitin 17722694
TCCTT	338	-	1	DOF1.7 ADOF1, At1g5170	Dof	A. thaliana	response to chitin 17722694
GCTTT	369	-	1	DOF1.7 ADOF1, At1g5170	Dof	A. thaliana	response to chitin 17722694
ACTTT	382	-	1	DOF1.7 ADOF1, At1g5170	Dof	A. thaliana	response to chitin 17722694
AAAGC	400	+	1	DOF1.7 ADOF1, At1g5170	Dof	A. thaliana	response to chitin 17722694
ACTTT	509	-	1	DOF1.7 ADOF1, At1g5170	Dof	A. thaliana	response to chitin 17722694
AAAGC	571	+	1	DOF1.7 ADOF1, At1g5170	Dof	A. thaliana	response to chitin 17722694
TCTTT	586	-	1	DOF1.7 ADOF1, At1g5170	Dof	A. thaliana	response to chitin 17722694
ACCTT	605	-	1	DOF1.7 ADOF1, At1g5170	Dof	A. thaliana	response to chitin 17722694
ACTTT	612	-	1	DOF1.7 ADOF1, At1g5170	Dof	A. thaliana	response to chitin 17722694
TCCTT	806	-	1	DOF1.7 ADOF1, At1g5170	Dof	A. thaliana	response to chitin 17722694
CCTTT	807	-	1	DOF1.7 ADOF1, At1g5170	Dof	A. thaliana	response to chitin 17722694
TCTTT	874	-	1	DOF1.7 ADOF1, At1g5170	Dof	A. thaliana	response to chitin 17722694
ACTTT	881	-	1	DOF1.7 ADOF1, At1g5170	Dof	A. thaliana	response to chitin 17722694
AAAGA	939	+	1	DOF1.7 ADOF1, At1g5170	Dof	A. thaliana	response to chitin 17722694
AAAGT	982	+	1	DOF1.7 ADOF1, At1g5170	Dof	A. thaliana	response to chitin 17722694
ACTTT	1021	-	1	DOF1.7 ADOF1, At1g5170	Dof	A. thaliana	response to chitin 17722694
AAAGG	1030	+	1	DOF1.7 ADOF1, At1g5170	Dof	A. thaliana	response to chitin 17722694
AAGGG	1031	+	1	DOF1.7 ADOF1, At1g5170	Dof	A. thaliana	response to chitin 17722694
TCCTT	1156	-	1	DOF1.7 ADOF1, At1g5170	Dof	A. thaliana	response to chitin 17722694
AAAGG	1289	+	1	DOF1.7 ADOF1, At1g5170	Dof	A. thaliana	response to chitin 17722694
AAGGC	1290	+	1	DOF1.7 ADOF1, At1g5170	Dof	A. thaliana	response to chitin 17722694
ACTTT	1297	-	1	DOF1.7 ADOF1, At1g5170	Dof	A. thaliana	response to chitin 17722694
AAAGG	1371	+	1	DOF1.7 ADOF1, At1g5170	Dof	A. thaliana	response to chitin 17722694
AAGGA	1372	+	1	DOF1.7 ADOF1, At1g5170	Dof	A. thaliana	response to chitin 17722694
AAAGA	1413	+	1	DOF1.7 ADOF1, At1g5170	Dof	A. thaliana	response to chitin 17722694
AAAGA	1420	+	1	DOF1.7 ADOF1, At1g5170	Dof	A. thaliana	response to chitin 17722694
GCCTT	79	-	1	CDF5 DOF1.10, HPPBF-2B, At1g69570	Dof	A. thaliana	Circadian-regulation. Highly expressed at the beginning of the light period, then decreases, reaching a minimum between 16 and 29 hours after dawn before rising again at the end of the day. PMID:19619493	Transcription factor that binds specifically to a 5'-AA[AG]G-3' consensus core sequence (By similarity). Regulates a photoperiodic flowering response. Transcriptional repressor of 'CONSTANS' expression. PMID:19619493
CCTTT	80	-	1	CDF5 DOF1.10, HPPBF-2B, At1g69570	Dof	A. thaliana	Circadian-regulation. Highly expressed at the beginning of the light period, then decreases, reaching a minimum between 16 and 29 hours after dawn before rising again at the end of the day. PMID:19619493	Transcription factor that binds specifically to a 5'-AA[AG]G-3' consensus core sequence (By similarity). Regulates a photoperiodic flowering response. Transcriptional repressor of 'CONSTANS' expression. PMID:19619493
AAAGT	109	+	1	CDF5 DOF1.10, HPPBF-2B, At1g69570	Dof	A. thaliana	Circadian-regulation. Highly expressed at the beginning of the light period, then decreases, reaching a minimum between 16 and 29 hours after dawn before rising again at the end of the day. PMID:19619493	Transcription factor that binds specifically to a 5'-AA[AG]G-3' consensus core sequence (By similarity). Regulates a photoperiodic flowering response. Transcriptional repressor of 'CONSTANS' expression. PMID:19619493
ACCTT	158	-	1	CDF5 DOF1.10, HPPBF-2B, At1g69570	Dof	A. thaliana	Circadian-regulation. Highly expressed at the beginning of the light period, then decreases, reaching a minimum between 16 and 29 hours after dawn before rising again at the end of the day. PMID:19619493	Transcription factor that binds specifically to a 5'-AA[AG]G-3' consensus core sequence (By similarity). Regulates a photoperiodic flowering response. Transcriptional repressor of 'CONSTANS' expression. PMID:19619493
ACCTT	184	-	1	CDF5 DOF1.10, HPPBF-2B, At1g69570	Dof	A. thaliana	Circadian-regulation. Highly expressed at the beginning of the light period, then decreases, reaching a minimum between 16 and 29 hours after dawn before rising again at the end of the day. PMID:19619493	Transcription factor that binds specifically to a 5'-AA[AG]G-3' consensus core sequence (By similarity). Regulates a photoperiodic flowering response. Transcriptional repressor of 'CONSTANS' expression. PMID:19619493
TCTTT	252	-	1	CDF5 DOF1.10, HPPBF-2B, At1g69570	Dof	A. thaliana	Circadian-regulation. Highly expressed at the beginning of the light period, then decreases, reaching a minimum between 16 and 29 hours after dawn before rising again at the end of the day. PMID:19619493	Transcription factor that binds specifically to a 5'-AA[AG]G-3' consensus core sequence (By similarity). Regulates a photoperiodic flowering response. Transcriptional repressor of 'CONSTANS' expression. PMID:19619493
TCCTT	275	-	1	CDF5 DOF1.10, HPPBF-2B, At1g69570	Dof	A. thaliana	Circadian-regulation. Highly expressed at the beginning of the light period, then decreases, reaching a minimum between 16 and 29 hours after dawn before rising again at the end of the day. PMID:19619493	Transcription factor that binds specifically to a 5'-AA[AG]G-3' consensus core sequence (By similarity). Regulates a photoperiodic flowering response. Transcriptional repressor of 'CONSTANS' expression. PMID:19619493
TCTTT	328	-	1	CDF5 DOF1.10, HPPBF-2B, At1g69570	Dof	A. thaliana	Circadian-regulation. Highly expressed at the beginning of the light period, then decreases, reaching a minimum between 16 and 29 hours after dawn before rising again at the end of the day. PMID:19619493	Transcription factor that binds specifically to a 5'-AA[AG]G-3' consensus core sequence (By similarity). Regulates a photoperiodic flowering response. Transcriptional repressor of 'CONSTANS' expression. PMID:19619493
TCCTT	338	-	1	CDF5 DOF1.10, HPPBF-2B, At1g69570	Dof	A. thaliana	Circadian-regulation. Highly expressed at the beginning of the light period, then decreases, reaching a minimum between 16 and 29 hours after dawn before rising again at the end of the day. PMID:19619493	Transcription factor that binds specifically to a 5'-AA[AG]G-3' consensus core sequence (By similarity). Regulates a photoperiodic flowering response. Transcriptional repressor of 'CONSTANS' expression. PMID:19619493
GCTTT	369	-	1	CDF5 DOF1.10, HPPBF-2B, At1g69570	Dof	A. thaliana	Circadian-regulation. Highly expressed at the beginning of the light period, then decreases, reaching a minimum between 16 and 29 hours after dawn before rising again at the end of the day. PMID:19619493	Transcription factor that binds specifically to a 5'-AA[AG]G-3' consensus core sequence (By similarity). Regulates a photoperiodic flowering response. Transcriptional repressor of 'CONSTANS' expression. PMID:19619493
ACTTT	382	-	1	CDF5 DOF1.10, HPPBF-2B, At1g69570	Dof	A. thaliana	Circadian-regulation. Highly expressed at the beginning of the light period, then decreases, reaching a minimum between 16 and 29 hours after dawn before rising again at the end of the day. PMID:19619493	Transcription factor that binds specifically to a 5'-AA[AG]G-3' consensus core sequence (By similarity). Regulates a photoperiodic flowering response. Transcriptional repressor of 'CONSTANS' expression. PMID:19619493
AAAGC	400	+	1	CDF5 DOF1.10, HPPBF-2B, At1g69570	Dof	A. thaliana	Circadian-regulation. Highly expressed at the beginning of the light period, then decreases, reaching a minimum between 16 and 29 hours after dawn before rising again at the end of the day. PMID:19619493	Transcription factor that binds specifically to a 5'-AA[AG]G-3' consensus core sequence (By similarity). Regulates a photoperiodic flowering response. Transcriptional repressor of 'CONSTANS' expression. PMID:19619493
ACTTT	509	-	1	CDF5 DOF1.10, HPPBF-2B, At1g69570	Dof	A. thaliana	Circadian-regulation. Highly expressed at the beginning of the light period, then decreases, reaching a minimum between 16 and 29 hours after dawn before rising again at the end of the day. PMID:19619493	Transcription factor that binds specifically to a 5'-AA[AG]G-3' consensus core sequence (By similarity). Regulates a photoperiodic flowering response. Transcriptional repressor of 'CONSTANS' expression. PMID:19619493
AAAGC	571	+	1	CDF5 DOF1.10, HPPBF-2B, At1g69570	Dof	A. thaliana	Circadian-regulation. Highly expressed at the beginning of the light period, then decreases, reaching a minimum between 16 and 29 hours after dawn before rising again at the end of the day. PMID:19619493	Transcription factor that binds specifically to a 5'-AA[AG]G-3' consensus core sequence (By similarity). Regulates a photoperiodic flowering response. Transcriptional repressor of 'CONSTANS' expression. PMID:19619493
TCTTT	586	-	1	CDF5 DOF1.10, HPPBF-2B, At1g69570	Dof	A. thaliana	Circadian-regulation. Highly expressed at the beginning of the light period, then decreases, reaching a minimum between 16 and 29 hours after dawn before rising again at the end of the day. PMID:19619493	Transcription factor that binds specifically to a 5'-AA[AG]G-3' consensus core sequence (By similarity). Regulates a photoperiodic flowering response. Transcriptional repressor of 'CONSTANS' expression. PMID:19619493
ACCTT	605	-	1	CDF5 DOF1.10, HPPBF-2B, At1g69570	Dof	A. thaliana	Circadian-regulation. Highly expressed at the beginning of the light period, then decreases, reaching a minimum between 16 and 29 hours after dawn before rising again at the end of the day. PMID:19619493	Transcription factor that binds specifically to a 5'-AA[AG]G-3' consensus core sequence (By similarity). Regulates a photoperiodic flowering response. Transcriptional repressor of 'CONSTANS' expression. PMID:19619493
ACTTT	612	-	1	CDF5 DOF1.10, HPPBF-2B, At1g69570	Dof	A. thaliana	Circadian-regulation. Highly expressed at the beginning of the light period, then decreases, reaching a minimum between 16 and 29 hours after dawn before rising again at the end of the day. PMID:19619493	Transcription factor that binds specifically to a 5'-AA[AG]G-3' consensus core sequence (By similarity). Regulates a photoperiodic flowering response. Transcriptional repressor of 'CONSTANS' expression. PMID:19619493
TCCTT	806	-	1	CDF5 DOF1.10, HPPBF-2B, At1g69570	Dof	A. thaliana	Circadian-regulation. Highly expressed at the beginning of the light period, then decreases, reaching a minimum between 16 and 29 hours after dawn before rising again at the end of the day. PMID:19619493	Transcription factor that binds specifically to a 5'-AA[AG]G-3' consensus core sequence (By similarity). Regulates a photoperiodic flowering response. Transcriptional repressor of 'CONSTANS' expression. PMID:19619493
CCTTT	807	-	1	CDF5 DOF1.10, HPPBF-2B, At1g69570	Dof	A. thaliana	Circadian-regulation. Highly expressed at the beginning of the light period, then decreases, reaching a minimum between 16 and 29 hours after dawn before rising again at the end of the day. PMID:19619493	Transcription factor that binds specifically to a 5'-AA[AG]G-3' consensus core sequence (By similarity). Regulates a photoperiodic flowering response. Transcriptional repressor of 'CONSTANS' expression. PMID:19619493
TCTTT	874	-	1	CDF5 DOF1.10, HPPBF-2B, At1g69570	Dof	A. thaliana	Circadian-regulation. Highly expressed at the beginning of the light period, then decreases, reaching a minimum between 16 and 29 hours after dawn before rising again at the end of the day. PMID:19619493	Transcription factor that binds specifically to a 5'-AA[AG]G-3' consensus core sequence (By similarity). Regulates a photoperiodic flowering response. Transcriptional repressor of 'CONSTANS' expression. PMID:19619493
ACTTT	881	-	1	CDF5 DOF1.10, HPPBF-2B, At1g69570	Dof	A. thaliana	Circadian-regulation. Highly expressed at the beginning of the light period, then decreases, reaching a minimum between 16 and 29 hours after dawn before rising again at the end of the day. PMID:19619493	Transcription factor that binds specifically to a 5'-AA[AG]G-3' consensus core sequence (By similarity). Regulates a photoperiodic flowering response. Transcriptional repressor of 'CONSTANS' expression. PMID:19619493
AAAGA	939	+	1	CDF5 DOF1.10, HPPBF-2B, At1g69570	Dof	A. thaliana	Circadian-regulation. Highly expressed at the beginning of the light period, then decreases, reaching a minimum between 16 and 29 hours after dawn before rising again at the end of the day. PMID:19619493	Transcription factor that binds specifically to a 5'-AA[AG]G-3' consensus core sequence (By similarity). Regulates a photoperiodic flowering response. Transcriptional repressor of 'CONSTANS' expression. PMID:19619493
AAAGT	982	+	1	CDF5 DOF1.10, HPPBF-2B, At1g69570	Dof	A. thaliana	Circadian-regulation. Highly expressed at the beginning of the light period, then decreases, reaching a minimum between 16 and 29 hours after dawn before rising again at the end of the day. PMID:19619493	Transcription factor that binds specifically to a 5'-AA[AG]G-3' consensus core sequence (By similarity). Regulates a photoperiodic flowering response. Transcriptional repressor of 'CONSTANS' expression. PMID:19619493
ACTTT	1021	-	1	CDF5 DOF1.10, HPPBF-2B, At1g69570	Dof	A. thaliana	Circadian-regulation. Highly expressed at the beginning of the light period, then decreases, reaching a minimum between 16 and 29 hours after dawn before rising again at the end of the day. PMID:19619493	Transcription factor that binds specifically to a 5'-AA[AG]G-3' consensus core sequence (By similarity). Regulates a photoperiodic flowering response. Transcriptional repressor of 'CONSTANS' expression. PMID:19619493
AAAGG	1030	+	1	CDF5 DOF1.10, HPPBF-2B, At1g69570	Dof	A. thaliana	Circadian-regulation. Highly expressed at the beginning of the light period, then decreases, reaching a minimum between 16 and 29 hours after dawn before rising again at the end of the day. PMID:19619493	Transcription factor that binds specifically to a 5'-AA[AG]G-3' consensus core sequence (By similarity). Regulates a photoperiodic flowering response. Transcriptional repressor of 'CONSTANS' expression. PMID:19619493
AAGGG	1031	+	1	CDF5 DOF1.10, HPPBF-2B, At1g69570	Dof	A. thaliana	Circadian-regulation. Highly expressed at the beginning of the light period, then decreases, reaching a minimum between 16 and 29 hours after dawn before rising again at the end of the day. PMID:19619493	Transcription factor that binds specifically to a 5'-AA[AG]G-3' consensus core sequence (By similarity). Regulates a photoperiodic flowering response. Transcriptional repressor of 'CONSTANS' expression. PMID:19619493
TCCTT	1156	-	1	CDF5 DOF1.10, HPPBF-2B, At1g69570	Dof	A. thaliana	Circadian-regulation. Highly expressed at the beginning of the light period, then decreases, reaching a minimum between 16 and 29 hours after dawn before rising again at the end of the day. PMID:19619493	Transcription factor that binds specifically to a 5'-AA[AG]G-3' consensus core sequence (By similarity). Regulates a photoperiodic flowering response. Transcriptional repressor of 'CONSTANS' expression. PMID:19619493
AAAGG	1289	+	1	CDF5 DOF1.10, HPPBF-2B, At1g69570	Dof	A. thaliana	Circadian-regulation. Highly expressed at the beginning of the light period, then decreases, reaching a minimum between 16 and 29 hours after dawn before rising again at the end of the day. PMID:19619493	Transcription factor that binds specifically to a 5'-AA[AG]G-3' consensus core sequence (By similarity). Regulates a photoperiodic flowering response. Transcriptional repressor of 'CONSTANS' expression. PMID:19619493
AAGGC	1290	+	1	CDF5 DOF1.10, HPPBF-2B, At1g69570	Dof	A. thaliana	Circadian-regulation. Highly expressed at the beginning of the light period, then decreases, reaching a minimum between 16 and 29 hours after dawn before rising again at the end of the day. PMID:19619493	Transcription factor that binds specifically to a 5'-AA[AG]G-3' consensus core sequence (By similarity). Regulates a photoperiodic flowering response. Transcriptional repressor of 'CONSTANS' expression. PMID:19619493
ACTTT	1297	-	1	CDF5 DOF1.10, HPPBF-2B, At1g69570	Dof	A. thaliana	Circadian-regulation. Highly expressed at the beginning of the light period, then decreases, reaching a minimum between 16 and 29 hours after dawn before rising again at the end of the day. PMID:19619493	Transcription factor that binds specifically to a 5'-AA[AG]G-3' consensus core sequence (By similarity). Regulates a photoperiodic flowering response. Transcriptional repressor of 'CONSTANS' expression. PMID:19619493
AAAGG	1371	+	1	CDF5 DOF1.10, HPPBF-2B, At1g69570	Dof	A. thaliana	Circadian-regulation. Highly expressed at the beginning of the light period, then decreases, reaching a minimum between 16 and 29 hours after dawn before rising again at the end of the day. PMID:19619493	Transcription factor that binds specifically to a 5'-AA[AG]G-3' consensus core sequence (By similarity). Regulates a photoperiodic flowering response. Transcriptional repressor of 'CONSTANS' expression. PMID:19619493
AAGGA	1372	+	1	CDF5 DOF1.10, HPPBF-2B, At1g69570	Dof	A. thaliana	Circadian-regulation. Highly expressed at the beginning of the light period, then decreases, reaching a minimum between 16 and 29 hours after dawn before rising again at the end of the day. PMID:19619493	Transcription factor that binds specifically to a 5'-AA[AG]G-3' consensus core sequence (By similarity). Regulates a photoperiodic flowering response. Transcriptional repressor of 'CONSTANS' expression. PMID:19619493
AAAGA	1413	+	1	CDF5 DOF1.10, HPPBF-2B, At1g69570	Dof	A. thaliana	Circadian-regulation. Highly expressed at the beginning of the light period, then decreases, reaching a minimum between 16 and 29 hours after dawn before rising again at the end of the day. PMID:19619493	Transcription factor that binds specifically to a 5'-AA[AG]G-3' consensus core sequence (By similarity). Regulates a photoperiodic flowering response. Transcriptional repressor of 'CONSTANS' expression. PMID:19619493
AAAGA	1420	+	1	CDF5 DOF1.10, HPPBF-2B, At1g69570	Dof	A. thaliana	Circadian-regulation. Highly expressed at the beginning of the light period, then decreases, reaching a minimum between 16 and 29 hours after dawn before rising again at the end of the day. PMID:19619493	Transcription factor that binds specifically to a 5'-AA[AG]G-3' consensus core sequence (By similarity). Regulates a photoperiodic flowering response. Transcriptional repressor of 'CONSTANS' expression. PMID:19619493
GCCTT	79	-	1	DOF2.1 At2g28510	Dof	A. thaliana
CCTTT	80	-	1	DOF2.1 At2g28510	Dof	A. thaliana
AAAGT	109	+	1	DOF2.1 At2g28510	Dof	A. thaliana
ACCTT	158	-	1	DOF2.1 At2g28510	Dof	A. thaliana
ACCTT	184	-	1	DOF2.1 At2g28510	Dof	A. thaliana
TCTTT	252	-	1	DOF2.1 At2g28510	Dof	A. thaliana
TCCTT	275	-	1	DOF2.1 At2g28510	Dof	A. thaliana
TCTTT	328	-	1	DOF2.1 At2g28510	Dof	A. thaliana
TCCTT	338	-	1	DOF2.1 At2g28510	Dof	A. thaliana
GCTTT	369	-	1	DOF2.1 At2g28510	Dof	A. thaliana
ACTTT	382	-	1	DOF2.1 At2g28510	Dof	A. thaliana
AAAGC	400	+	1	DOF2.1 At2g28510	Dof	A. thaliana
ACTTT	509	-	1	DOF2.1 At2g28510	Dof	A. thaliana
AAAGC	571	+	1	DOF2.1 At2g28510	Dof	A. thaliana
TCTTT	586	-	1	DOF2.1 At2g28510	Dof	A. thaliana
ACCTT	605	-	1	DOF2.1 At2g28510	Dof	A. thaliana
ACTTT	612	-	1	DOF2.1 At2g28510	Dof	A. thaliana
TCCTT	806	-	1	DOF2.1 At2g28510	Dof	A. thaliana
CCTTT	807	-	1	DOF2.1 At2g28510	Dof	A. thaliana
TCTTT	874	-	1	DOF2.1 At2g28510	Dof	A. thaliana
ACTTT	881	-	1	DOF2.1 At2g28510	Dof	A. thaliana
AAAGA	939	+	1	DOF2.1 At2g28510	Dof	A. thaliana
AAAGT	982	+	1	DOF2.1 At2g28510	Dof	A. thaliana
ACTTT	1021	-	1	DOF2.1 At2g28510	Dof	A. thaliana
AAAGG	1030	+	1	DOF2.1 At2g28510	Dof	A. thaliana
AAGGG	1031	+	1	DOF2.1 At2g28510	Dof	A. thaliana
TCCTT	1156	-	1	DOF2.1 At2g28510	Dof	A. thaliana
AAAGG	1289	+	1	DOF2.1 At2g28510	Dof	A. thaliana
AAGGC	1290	+	1	DOF2.1 At2g28510	Dof	A. thaliana
ACTTT	1297	-	1	DOF2.1 At2g28510	Dof	A. thaliana
AAAGG	1371	+	1	DOF2.1 At2g28510	Dof	A. thaliana
AAGGA	1372	+	1	DOF2.1 At2g28510	Dof	A. thaliana
AAAGA	1413	+	1	DOF2.1 At2g28510	Dof	A. thaliana
AAAGA	1420	+	1	DOF2.1 At2g28510	Dof	A. thaliana
GCCTT	79	-	1	DOF2.2 At2g2881	Dof	A. thaliana
CCTTT	80	-	1	DOF2.2 At2g2881	Dof	A. thaliana
AAAGT	109	+	1	DOF2.2 At2g2881	Dof	A. thaliana
ACCTT	158	-	1	DOF2.2 At2g2881	Dof	A. thaliana
ACCTT	184	-	1	DOF2.2 At2g2881	Dof	A. thaliana
TCTTT	252	-	1	DOF2.2 At2g2881	Dof	A. thaliana
TCCTT	275	-	1	DOF2.2 At2g2881	Dof	A. thaliana
TCTTT	328	-	1	DOF2.2 At2g2881	Dof	A. thaliana
TCCTT	338	-	1	DOF2.2 At2g2881	Dof	A. thaliana
GCTTT	369	-	1	DOF2.2 At2g2881	Dof	A. thaliana
ACTTT	382	-	1	DOF2.2 At2g2881	Dof	A. thaliana
AAAGC	400	+	1	DOF2.2 At2g2881	Dof	A. thaliana
ACTTT	509	-	1	DOF2.2 At2g2881	Dof	A. thaliana
AAAGC	571	+	1	DOF2.2 At2g2881	Dof	A. thaliana
TCTTT	586	-	1	DOF2.2 At2g2881	Dof	A. thaliana
ACCTT	605	-	1	DOF2.2 At2g2881	Dof	A. thaliana
ACTTT	612	-	1	DOF2.2 At2g2881	Dof	A. thaliana
TCCTT	806	-	1	DOF2.2 At2g2881	Dof	A. thaliana
CCTTT	807	-	1	DOF2.2 At2g2881	Dof	A. thaliana
TCTTT	874	-	1	DOF2.2 At2g2881	Dof	A. thaliana
ACTTT	881	-	1	DOF2.2 At2g2881	Dof	A. thaliana
AAAGA	939	+	1	DOF2.2 At2g2881	Dof	A. thaliana
AAAGT	982	+	1	DOF2.2 At2g2881	Dof	A. thaliana
ACTTT	1021	-	1	DOF2.2 At2g2881	Dof	A. thaliana
AAAGG	1030	+	1	DOF2.2 At2g2881	Dof	A. thaliana
AAGGG	1031	+	1	DOF2.2 At2g2881	Dof	A. thaliana
TCCTT	1156	-	1	DOF2.2 At2g2881	Dof	A. thaliana
AAAGG	1289	+	1	DOF2.2 At2g2881	Dof	A. thaliana
AAGGC	1290	+	1	DOF2.2 At2g2881	Dof	A. thaliana
ACTTT	1297	-	1	DOF2.2 At2g2881	Dof	A. thaliana
AAAGG	1371	+	1	DOF2.2 At2g2881	Dof	A. thaliana
AAGGA	1372	+	1	DOF2.2 At2g2881	Dof	A. thaliana
AAAGA	1413	+	1	DOF2.2 At2g2881	Dof	A. thaliana
AAAGA	1420	+	1	DOF2.2 At2g2881	Dof	A. thaliana
GCCTT	79	-	1	CDF4 DOF2.3, At2g34140	Dof	A. thaliana	Circadian-regulation. The transcript level rises progressively from dawn and decreases during the night. PMID:19619493	Transcription factor that binds specifically to a 5'-AA[AG]G-3' consensus core sequence (By similarity). Transcriptional repressor of 'CONSTANS' expression (By similarity). Regulates a photoperiodic flowering response. PMID:19619493 negative regulation of stem cell population maintenance 26028217
CCTTT	80	-	1	CDF4 DOF2.3, At2g34140	Dof	A. thaliana	Circadian-regulation. The transcript level rises progressively from dawn and decreases during the night. PMID:19619493	Transcription factor that binds specifically to a 5'-AA[AG]G-3' consensus core sequence (By similarity). Transcriptional repressor of 'CONSTANS' expression (By similarity). Regulates a photoperiodic flowering response. PMID:19619493 negative regulation of stem cell population maintenance 26028217
AAAGT	109	+	1	CDF4 DOF2.3, At2g34140	Dof	A. thaliana	Circadian-regulation. The transcript level rises progressively from dawn and decreases during the night. PMID:19619493	Transcription factor that binds specifically to a 5'-AA[AG]G-3' consensus core sequence (By similarity). Transcriptional repressor of 'CONSTANS' expression (By similarity). Regulates a photoperiodic flowering response. PMID:19619493 negative regulation of stem cell population maintenance 26028217
ACCTT	158	-	1	CDF4 DOF2.3, At2g34140	Dof	A. thaliana	Circadian-regulation. The transcript level rises progressively from dawn and decreases during the night. PMID:19619493	Transcription factor that binds specifically to a 5'-AA[AG]G-3' consensus core sequence (By similarity). Transcriptional repressor of 'CONSTANS' expression (By similarity). Regulates a photoperiodic flowering response. PMID:19619493 negative regulation of stem cell population maintenance 26028217
ACCTT	184	-	1	CDF4 DOF2.3, At2g34140	Dof	A. thaliana	Circadian-regulation. The transcript level rises progressively from dawn and decreases during the night. PMID:19619493	Transcription factor that binds specifically to a 5'-AA[AG]G-3' consensus core sequence (By similarity). Transcriptional repressor of 'CONSTANS' expression (By similarity). Regulates a photoperiodic flowering response. PMID:19619493 negative regulation of stem cell population maintenance 26028217
TCTTT	252	-	1	CDF4 DOF2.3, At2g34140	Dof	A. thaliana	Circadian-regulation. The transcript level rises progressively from dawn and decreases during the night. PMID:19619493	Transcription factor that binds specifically to a 5'-AA[AG]G-3' consensus core sequence (By similarity). Transcriptional repressor of 'CONSTANS' expression (By similarity). Regulates a photoperiodic flowering response. PMID:19619493 negative regulation of stem cell population maintenance 26028217
TCCTT	275	-	1	CDF4 DOF2.3, At2g34140	Dof	A. thaliana	Circadian-regulation. The transcript level rises progressively from dawn and decreases during the night. PMID:19619493	Transcription factor that binds specifically to a 5'-AA[AG]G-3' consensus core sequence (By similarity). Transcriptional repressor of 'CONSTANS' expression (By similarity). Regulates a photoperiodic flowering response. PMID:19619493 negative regulation of stem cell population maintenance 26028217
TCTTT	328	-	1	CDF4 DOF2.3, At2g34140	Dof	A. thaliana	Circadian-regulation. The transcript level rises progressively from dawn and decreases during the night. PMID:19619493	Transcription factor that binds specifically to a 5'-AA[AG]G-3' consensus core sequence (By similarity). Transcriptional repressor of 'CONSTANS' expression (By similarity). Regulates a photoperiodic flowering response. PMID:19619493 negative regulation of stem cell population maintenance 26028217
TCCTT	338	-	1	CDF4 DOF2.3, At2g34140	Dof	A. thaliana	Circadian-regulation. The transcript level rises progressively from dawn and decreases during the night. PMID:19619493	Transcription factor that binds specifically to a 5'-AA[AG]G-3' consensus core sequence (By similarity). Transcriptional repressor of 'CONSTANS' expression (By similarity). Regulates a photoperiodic flowering response. PMID:19619493 negative regulation of stem cell population maintenance 26028217
GCTTT	369	-	1	CDF4 DOF2.3, At2g34140	Dof	A. thaliana	Circadian-regulation. The transcript level rises progressively from dawn and decreases during the night. PMID:19619493	Transcription factor that binds specifically to a 5'-AA[AG]G-3' consensus core sequence (By similarity). Transcriptional repressor of 'CONSTANS' expression (By similarity). Regulates a photoperiodic flowering response. PMID:19619493 negative regulation of stem cell population maintenance 26028217
ACTTT	382	-	1	CDF4 DOF2.3, At2g34140	Dof	A. thaliana	Circadian-regulation. The transcript level rises progressively from dawn and decreases during the night. PMID:19619493	Transcription factor that binds specifically to a 5'-AA[AG]G-3' consensus core sequence (By similarity). Transcriptional repressor of 'CONSTANS' expression (By similarity). Regulates a photoperiodic flowering response. PMID:19619493 negative regulation of stem cell population maintenance 26028217
AAAGC	400	+	1	CDF4 DOF2.3, At2g34140	Dof	A. thaliana	Circadian-regulation. The transcript level rises progressively from dawn and decreases during the night. PMID:19619493	Transcription factor that binds specifically to a 5'-AA[AG]G-3' consensus core sequence (By similarity). Transcriptional repressor of 'CONSTANS' expression (By similarity). Regulates a photoperiodic flowering response. PMID:19619493 negative regulation of stem cell population maintenance 26028217
ACTTT	509	-	1	CDF4 DOF2.3, At2g34140	Dof	A. thaliana	Circadian-regulation. The transcript level rises progressively from dawn and decreases during the night. PMID:19619493	Transcription factor that binds specifically to a 5'-AA[AG]G-3' consensus core sequence (By similarity). Transcriptional repressor of 'CONSTANS' expression (By similarity). Regulates a photoperiodic flowering response. PMID:19619493 negative regulation of stem cell population maintenance 26028217
AAAGC	571	+	1	CDF4 DOF2.3, At2g34140	Dof	A. thaliana	Circadian-regulation. The transcript level rises progressively from dawn and decreases during the night. PMID:19619493	Transcription factor that binds specifically to a 5'-AA[AG]G-3' consensus core sequence (By similarity). Transcriptional repressor of 'CONSTANS' expression (By similarity). Regulates a photoperiodic flowering response. PMID:19619493 negative regulation of stem cell population maintenance 26028217
TCTTT	586	-	1	CDF4 DOF2.3, At2g34140	Dof	A. thaliana	Circadian-regulation. The transcript level rises progressively from dawn and decreases during the night. PMID:19619493	Transcription factor that binds specifically to a 5'-AA[AG]G-3' consensus core sequence (By similarity). Transcriptional repressor of 'CONSTANS' expression (By similarity). Regulates a photoperiodic flowering response. PMID:19619493 negative regulation of stem cell population maintenance 26028217
ACCTT	605	-	1	CDF4 DOF2.3, At2g34140	Dof	A. thaliana	Circadian-regulation. The transcript level rises progressively from dawn and decreases during the night. PMID:19619493	Transcription factor that binds specifically to a 5'-AA[AG]G-3' consensus core sequence (By similarity). Transcriptional repressor of 'CONSTANS' expression (By similarity). Regulates a photoperiodic flowering response. PMID:19619493 negative regulation of stem cell population maintenance 26028217
ACTTT	612	-	1	CDF4 DOF2.3, At2g34140	Dof	A. thaliana	Circadian-regulation. The transcript level rises progressively from dawn and decreases during the night. PMID:19619493	Transcription factor that binds specifically to a 5'-AA[AG]G-3' consensus core sequence (By similarity). Transcriptional repressor of 'CONSTANS' expression (By similarity). Regulates a photoperiodic flowering response. PMID:19619493 negative regulation of stem cell population maintenance 26028217
TCCTT	806	-	1	CDF4 DOF2.3, At2g34140	Dof	A. thaliana	Circadian-regulation. The transcript level rises progressively from dawn and decreases during the night. PMID:19619493	Transcription factor that binds specifically to a 5'-AA[AG]G-3' consensus core sequence (By similarity). Transcriptional repressor of 'CONSTANS' expression (By similarity). Regulates a photoperiodic flowering response. PMID:19619493 negative regulation of stem cell population maintenance 26028217
CCTTT	807	-	1	CDF4 DOF2.3, At2g34140	Dof	A. thaliana	Circadian-regulation. The transcript level rises progressively from dawn and decreases during the night. PMID:19619493	Transcription factor that binds specifically to a 5'-AA[AG]G-3' consensus core sequence (By similarity). Transcriptional repressor of 'CONSTANS' expression (By similarity). Regulates a photoperiodic flowering response. PMID:19619493 negative regulation of stem cell population maintenance 26028217
TCTTT	874	-	1	CDF4 DOF2.3, At2g34140	Dof	A. thaliana	Circadian-regulation. The transcript level rises progressively from dawn and decreases during the night. PMID:19619493	Transcription factor that binds specifically to a 5'-AA[AG]G-3' consensus core sequence (By similarity). Transcriptional repressor of 'CONSTANS' expression (By similarity). Regulates a photoperiodic flowering response. PMID:19619493 negative regulation of stem cell population maintenance 26028217
ACTTT	881	-	1	CDF4 DOF2.3, At2g34140	Dof	A. thaliana	Circadian-regulation. The transcript level rises progressively from dawn and decreases during the night. PMID:19619493	Transcription factor that binds specifically to a 5'-AA[AG]G-3' consensus core sequence (By similarity). Transcriptional repressor of 'CONSTANS' expression (By similarity). Regulates a photoperiodic flowering response. PMID:19619493 negative regulation of stem cell population maintenance 26028217
AAAGA	939	+	1	CDF4 DOF2.3, At2g34140	Dof	A. thaliana	Circadian-regulation. The transcript level rises progressively from dawn and decreases during the night. PMID:19619493	Transcription factor that binds specifically to a 5'-AA[AG]G-3' consensus core sequence (By similarity). Transcriptional repressor of 'CONSTANS' expression (By similarity). Regulates a photoperiodic flowering response. PMID:19619493 negative regulation of stem cell population maintenance 26028217
AAAGT	982	+	1	CDF4 DOF2.3, At2g34140	Dof	A. thaliana	Circadian-regulation. The transcript level rises progressively from dawn and decreases during the night. PMID:19619493	Transcription factor that binds specifically to a 5'-AA[AG]G-3' consensus core sequence (By similarity). Transcriptional repressor of 'CONSTANS' expression (By similarity). Regulates a photoperiodic flowering response. PMID:19619493 negative regulation of stem cell population maintenance 26028217
ACTTT	1021	-	1	CDF4 DOF2.3, At2g34140	Dof	A. thaliana	Circadian-regulation. The transcript level rises progressively from dawn and decreases during the night. PMID:19619493	Transcription factor that binds specifically to a 5'-AA[AG]G-3' consensus core sequence (By similarity). Transcriptional repressor of 'CONSTANS' expression (By similarity). Regulates a photoperiodic flowering response. PMID:19619493 negative regulation of stem cell population maintenance 26028217
AAAGG	1030	+	1	CDF4 DOF2.3, At2g34140	Dof	A. thaliana	Circadian-regulation. The transcript level rises progressively from dawn and decreases during the night. PMID:19619493	Transcription factor that binds specifically to a 5'-AA[AG]G-3' consensus core sequence (By similarity). Transcriptional repressor of 'CONSTANS' expression (By similarity). Regulates a photoperiodic flowering response. PMID:19619493 negative regulation of stem cell population maintenance 26028217
AAGGG	1031	+	1	CDF4 DOF2.3, At2g34140	Dof	A. thaliana	Circadian-regulation. The transcript level rises progressively from dawn and decreases during the night. PMID:19619493	Transcription factor that binds specifically to a 5'-AA[AG]G-3' consensus core sequence (By similarity). Transcriptional repressor of 'CONSTANS' expression (By similarity). Regulates a photoperiodic flowering response. PMID:19619493 negative regulation of stem cell population maintenance 26028217
TCCTT	1156	-	1	CDF4 DOF2.3, At2g34140	Dof	A. thaliana	Circadian-regulation. The transcript level rises progressively from dawn and decreases during the night. PMID:19619493	Transcription factor that binds specifically to a 5'-AA[AG]G-3' consensus core sequence (By similarity). Transcriptional repressor of 'CONSTANS' expression (By similarity). Regulates a photoperiodic flowering response. PMID:19619493 negative regulation of stem cell population maintenance 26028217
AAAGG	1289	+	1	CDF4 DOF2.3, At2g34140	Dof	A. thaliana	Circadian-regulation. The transcript level rises progressively from dawn and decreases during the night. PMID:19619493	Transcription factor that binds specifically to a 5'-AA[AG]G-3' consensus core sequence (By similarity). Transcriptional repressor of 'CONSTANS' expression (By similarity). Regulates a photoperiodic flowering response. PMID:19619493 negative regulation of stem cell population maintenance 26028217
AAGGC	1290	+	1	CDF4 DOF2.3, At2g34140	Dof	A. thaliana	Circadian-regulation. The transcript level rises progressively from dawn and decreases during the night. PMID:19619493	Transcription factor that binds specifically to a 5'-AA[AG]G-3' consensus core sequence (By similarity). Transcriptional repressor of 'CONSTANS' expression (By similarity). Regulates a photoperiodic flowering response. PMID:19619493 negative regulation of stem cell population maintenance 26028217
ACTTT	1297	-	1	CDF4 DOF2.3, At2g34140	Dof	A. thaliana	Circadian-regulation. The transcript level rises progressively from dawn and decreases during the night. PMID:19619493	Transcription factor that binds specifically to a 5'-AA[AG]G-3' consensus core sequence (By similarity). Transcriptional repressor of 'CONSTANS' expression (By similarity). Regulates a photoperiodic flowering response. PMID:19619493 negative regulation of stem cell population maintenance 26028217
AAAGG	1371	+	1	CDF4 DOF2.3, At2g34140	Dof	A. thaliana	Circadian-regulation. The transcript level rises progressively from dawn and decreases during the night. PMID:19619493	Transcription factor that binds specifically to a 5'-AA[AG]G-3' consensus core sequence (By similarity). Transcriptional repressor of 'CONSTANS' expression (By similarity). Regulates a photoperiodic flowering response. PMID:19619493 negative regulation of stem cell population maintenance 26028217
AAGGA	1372	+	1	CDF4 DOF2.3, At2g34140	Dof	A. thaliana	Circadian-regulation. The transcript level rises progressively from dawn and decreases during the night. PMID:19619493	Transcription factor that binds specifically to a 5'-AA[AG]G-3' consensus core sequence (By similarity). Transcriptional repressor of 'CONSTANS' expression (By similarity). Regulates a photoperiodic flowering response. PMID:19619493 negative regulation of stem cell population maintenance 26028217
AAAGA	1413	+	1	CDF4 DOF2.3, At2g34140	Dof	A. thaliana	Circadian-regulation. The transcript level rises progressively from dawn and decreases during the night. PMID:19619493	Transcription factor that binds specifically to a 5'-AA[AG]G-3' consensus core sequence (By similarity). Transcriptional repressor of 'CONSTANS' expression (By similarity). Regulates a photoperiodic flowering response. PMID:19619493 negative regulation of stem cell population maintenance 26028217
AAAGA	1420	+	1	CDF4 DOF2.3, At2g34140	Dof	A. thaliana	Circadian-regulation. The transcript level rises progressively from dawn and decreases during the night. PMID:19619493	Transcription factor that binds specifically to a 5'-AA[AG]G-3' consensus core sequence (By similarity). Transcriptional repressor of 'CONSTANS' expression (By similarity). Regulates a photoperiodic flowering response. PMID:19619493 negative regulation of stem cell population maintenance 26028217
GCCTT	79	-	1	DOF3.4 OBP1, At3g50410	Dof	A. thaliana	Induction by auxin and salicylic acid (SA). PMID:10758484	Transcription factor that binds specifically to a 5'-AA[AG]G-3' consensus core sequence. Enhances the DNA binding of OBF transcription factors to OCS elements. cell wall modification 18665917, positive regulation of cell cycle 18665917,
CCTTT	80	-	1	DOF3.4 OBP1, At3g50410	Dof	A. thaliana	Induction by auxin and salicylic acid (SA). PMID:10758484	Transcription factor that binds specifically to a 5'-AA[AG]G-3' consensus core sequence. Enhances the DNA binding of OBF transcription factors to OCS elements. cell wall modification 18665917, positive regulation of cell cycle 18665917,
AAAGT	109	+	1	DOF3.4 OBP1, At3g50410	Dof	A. thaliana	Induction by auxin and salicylic acid (SA). PMID:10758484	Transcription factor that binds specifically to a 5'-AA[AG]G-3' consensus core sequence. Enhances the DNA binding of OBF transcription factors to OCS elements. cell wall modification 18665917, positive regulation of cell cycle 18665917,
ACCTT	158	-	1	DOF3.4 OBP1, At3g50410	Dof	A. thaliana	Induction by auxin and salicylic acid (SA). PMID:10758484	Transcription factor that binds specifically to a 5'-AA[AG]G-3' consensus core sequence. Enhances the DNA binding of OBF transcription factors to OCS elements. cell wall modification 18665917, positive regulation of cell cycle 18665917,
ACCTT	184	-	1	DOF3.4 OBP1, At3g50410	Dof	A. thaliana	Induction by auxin and salicylic acid (SA). PMID:10758484	Transcription factor that binds specifically to a 5'-AA[AG]G-3' consensus core sequence. Enhances the DNA binding of OBF transcription factors to OCS elements. cell wall modification 18665917, positive regulation of cell cycle 18665917,
TCTTT	252	-	1	DOF3.4 OBP1, At3g50410	Dof	A. thaliana	Induction by auxin and salicylic acid (SA). PMID:10758484	Transcription factor that binds specifically to a 5'-AA[AG]G-3' consensus core sequence. Enhances the DNA binding of OBF transcription factors to OCS elements. cell wall modification 18665917, positive regulation of cell cycle 18665917,
TCCTT	275	-	1	DOF3.4 OBP1, At3g50410	Dof	A. thaliana	Induction by auxin and salicylic acid (SA). PMID:10758484	Transcription factor that binds specifically to a 5'-AA[AG]G-3' consensus core sequence. Enhances the DNA binding of OBF transcription factors to OCS elements. cell wall modification 18665917, positive regulation of cell cycle 18665917,
TCTTT	328	-	1	DOF3.4 OBP1, At3g50410	Dof	A. thaliana	Induction by auxin and salicylic acid (SA). PMID:10758484	Transcription factor that binds specifically to a 5'-AA[AG]G-3' consensus core sequence. Enhances the DNA binding of OBF transcription factors to OCS elements. cell wall modification 18665917, positive regulation of cell cycle 18665917,
TCCTT	338	-	1	DOF3.4 OBP1, At3g50410	Dof	A. thaliana	Induction by auxin and salicylic acid (SA). PMID:10758484	Transcription factor that binds specifically to a 5'-AA[AG]G-3' consensus core sequence. Enhances the DNA binding of OBF transcription factors to OCS elements. cell wall modification 18665917, positive regulation of cell cycle 18665917,
GCTTT	369	-	1	DOF3.4 OBP1, At3g50410	Dof	A. thaliana	Induction by auxin and salicylic acid (SA). PMID:10758484	Transcription factor that binds specifically to a 5'-AA[AG]G-3' consensus core sequence. Enhances the DNA binding of OBF transcription factors to OCS elements. cell wall modification 18665917, positive regulation of cell cycle 18665917,
ACTTT	382	-	1	DOF3.4 OBP1, At3g50410	Dof	A. thaliana	Induction by auxin and salicylic acid (SA). PMID:10758484	Transcription factor that binds specifically to a 5'-AA[AG]G-3' consensus core sequence. Enhances the DNA binding of OBF transcription factors to OCS elements. cell wall modification 18665917, positive regulation of cell cycle 18665917,
AAAGC	400	+	1	DOF3.4 OBP1, At3g50410	Dof	A. thaliana	Induction by auxin and salicylic acid (SA). PMID:10758484	Transcription factor that binds specifically to a 5'-AA[AG]G-3' consensus core sequence. Enhances the DNA binding of OBF transcription factors to OCS elements. cell wall modification 18665917, positive regulation of cell cycle 18665917,
ACTTT	509	-	1	DOF3.4 OBP1, At3g50410	Dof	A. thaliana	Induction by auxin and salicylic acid (SA). PMID:10758484	Transcription factor that binds specifically to a 5'-AA[AG]G-3' consensus core sequence. Enhances the DNA binding of OBF transcription factors to OCS elements. cell wall modification 18665917, positive regulation of cell cycle 18665917,
AAAGC	571	+	1	DOF3.4 OBP1, At3g50410	Dof	A. thaliana	Induction by auxin and salicylic acid (SA). PMID:10758484	Transcription factor that binds specifically to a 5'-AA[AG]G-3' consensus core sequence. Enhances the DNA binding of OBF transcription factors to OCS elements. cell wall modification 18665917, positive regulation of cell cycle 18665917,
TCTTT	586	-	1	DOF3.4 OBP1, At3g50410	Dof	A. thaliana	Induction by auxin and salicylic acid (SA). PMID:10758484	Transcription factor that binds specifically to a 5'-AA[AG]G-3' consensus core sequence. Enhances the DNA binding of OBF transcription factors to OCS elements. cell wall modification 18665917, positive regulation of cell cycle 18665917,
ACCTT	605	-	1	DOF3.4 OBP1, At3g50410	Dof	A. thaliana	Induction by auxin and salicylic acid (SA). PMID:10758484	Transcription factor that binds specifically to a 5'-AA[AG]G-3' consensus core sequence. Enhances the DNA binding of OBF transcription factors to OCS elements. cell wall modification 18665917, positive regulation of cell cycle 18665917,
ACTTT	612	-	1	DOF3.4 OBP1, At3g50410	Dof	A. thaliana	Induction by auxin and salicylic acid (SA). PMID:10758484	Transcription factor that binds specifically to a 5'-AA[AG]G-3' consensus core sequence. Enhances the DNA binding of OBF transcription factors to OCS elements. cell wall modification 18665917, positive regulation of cell cycle 18665917,
TCCTT	806	-	1	DOF3.4 OBP1, At3g50410	Dof	A. thaliana	Induction by auxin and salicylic acid (SA). PMID:10758484	Transcription factor that binds specifically to a 5'-AA[AG]G-3' consensus core sequence. Enhances the DNA binding of OBF transcription factors to OCS elements. cell wall modification 18665917, positive regulation of cell cycle 18665917,
CCTTT	807	-	1	DOF3.4 OBP1, At3g50410	Dof	A. thaliana	Induction by auxin and salicylic acid (SA). PMID:10758484	Transcription factor that binds specifically to a 5'-AA[AG]G-3' consensus core sequence. Enhances the DNA binding of OBF transcription factors to OCS elements. cell wall modification 18665917, positive regulation of cell cycle 18665917,
TCTTT	874	-	1	DOF3.4 OBP1, At3g50410	Dof	A. thaliana	Induction by auxin and salicylic acid (SA). PMID:10758484	Transcription factor that binds specifically to a 5'-AA[AG]G-3' consensus core sequence. Enhances the DNA binding of OBF transcription factors to OCS elements. cell wall modification 18665917, positive regulation of cell cycle 18665917,
ACTTT	881	-	1	DOF3.4 OBP1, At3g50410	Dof	A. thaliana	Induction by auxin and salicylic acid (SA). PMID:10758484	Transcription factor that binds specifically to a 5'-AA[AG]G-3' consensus core sequence. Enhances the DNA binding of OBF transcription factors to OCS elements. cell wall modification 18665917, positive regulation of cell cycle 18665917,
AAAGA	939	+	1	DOF3.4 OBP1, At3g50410	Dof	A. thaliana	Induction by auxin and salicylic acid (SA). PMID:10758484	Transcription factor that binds specifically to a 5'-AA[AG]G-3' consensus core sequence. Enhances the DNA binding of OBF transcription factors to OCS elements. cell wall modification 18665917, positive regulation of cell cycle 18665917,
AAAGT	982	+	1	DOF3.4 OBP1, At3g50410	Dof	A. thaliana	Induction by auxin and salicylic acid (SA). PMID:10758484	Transcription factor that binds specifically to a 5'-AA[AG]G-3' consensus core sequence. Enhances the DNA binding of OBF transcription factors to OCS elements. cell wall modification 18665917, positive regulation of cell cycle 18665917,
ACTTT	1021	-	1	DOF3.4 OBP1, At3g50410	Dof	A. thaliana	Induction by auxin and salicylic acid (SA). PMID:10758484	Transcription factor that binds specifically to a 5'-AA[AG]G-3' consensus core sequence. Enhances the DNA binding of OBF transcription factors to OCS elements. cell wall modification 18665917, positive regulation of cell cycle 18665917,
AAAGG	1030	+	1	DOF3.4 OBP1, At3g50410	Dof	A. thaliana	Induction by auxin and salicylic acid (SA). PMID:10758484	Transcription factor that binds specifically to a 5'-AA[AG]G-3' consensus core sequence. Enhances the DNA binding of OBF transcription factors to OCS elements. cell wall modification 18665917, positive regulation of cell cycle 18665917,
AAGGG	1031	+	1	DOF3.4 OBP1, At3g50410	Dof	A. thaliana	Induction by auxin and salicylic acid (SA). PMID:10758484	Transcription factor that binds specifically to a 5'-AA[AG]G-3' consensus core sequence. Enhances the DNA binding of OBF transcription factors to OCS elements. cell wall modification 18665917, positive regulation of cell cycle 18665917,
TCCTT	1156	-	1	DOF3.4 OBP1, At3g50410	Dof	A. thaliana	Induction by auxin and salicylic acid (SA). PMID:10758484	Transcription factor that binds specifically to a 5'-AA[AG]G-3' consensus core sequence. Enhances the DNA binding of OBF transcription factors to OCS elements. cell wall modification 18665917, positive regulation of cell cycle 18665917,
AAAGG	1289	+	1	DOF3.4 OBP1, At3g50410	Dof	A. thaliana	Induction by auxin and salicylic acid (SA). PMID:10758484	Transcription factor that binds specifically to a 5'-AA[AG]G-3' consensus core sequence. Enhances the DNA binding of OBF transcription factors to OCS elements. cell wall modification 18665917, positive regulation of cell cycle 18665917,
AAGGC	1290	+	1	DOF3.4 OBP1, At3g50410	Dof	A. thaliana	Induction by auxin and salicylic acid (SA). PMID:10758484	Transcription factor that binds specifically to a 5'-AA[AG]G-3' consensus core sequence. Enhances the DNA binding of OBF transcription factors to OCS elements. cell wall modification 18665917, positive regulation of cell cycle 18665917,
ACTTT	1297	-	1	DOF3.4 OBP1, At3g50410	Dof	A. thaliana	Induction by auxin and salicylic acid (SA). PMID:10758484	Transcription factor that binds specifically to a 5'-AA[AG]G-3' consensus core sequence. Enhances the DNA binding of OBF transcription factors to OCS elements. cell wall modification 18665917, positive regulation of cell cycle 18665917,
AAAGG	1371	+	1	DOF3.4 OBP1, At3g50410	Dof	A. thaliana	Induction by auxin and salicylic acid (SA). PMID:10758484	Transcription factor that binds specifically to a 5'-AA[AG]G-3' consensus core sequence. Enhances the DNA binding of OBF transcription factors to OCS elements. cell wall modification 18665917, positive regulation of cell cycle 18665917,
AAGGA	1372	+	1	DOF3.4 OBP1, At3g50410	Dof	A. thaliana	Induction by auxin and salicylic acid (SA). PMID:10758484	Transcription factor that binds specifically to a 5'-AA[AG]G-3' consensus core sequence. Enhances the DNA binding of OBF transcription factors to OCS elements. cell wall modification 18665917, positive regulation of cell cycle 18665917,
AAAGA	1413	+	1	DOF3.4 OBP1, At3g50410	Dof	A. thaliana	Induction by auxin and salicylic acid (SA). PMID:10758484	Transcription factor that binds specifically to a 5'-AA[AG]G-3' consensus core sequence. Enhances the DNA binding of OBF transcription factors to OCS elements. cell wall modification 18665917, positive regulation of cell cycle 18665917,
AAAGA	1420	+	1	DOF3.4 OBP1, At3g50410	Dof	A. thaliana	Induction by auxin and salicylic acid (SA). PMID:10758484	Transcription factor that binds specifically to a 5'-AA[AG]G-3' consensus core sequence. Enhances the DNA binding of OBF transcription factors to OCS elements. cell wall modification 18665917, positive regulation of cell cycle 18665917,
GCCTT	79	-	1	DOF3.6 OBP3, At3g55370	Dof	A. thaliana	Induced by auxin and salicylic acid (SA). Repressed by jasmonic acid (JA). PMID:10758484, PMID:12887587	Transcription factor that binds specifically to a 5'-AA[AG]G-3' consensus core sequence. Enhances the DNA binding of OBF transcription factors to OCS elements. PMID:12887587
CCTTT	80	-	1	DOF3.6 OBP3, At3g55370	Dof	A. thaliana	Induced by auxin and salicylic acid (SA). Repressed by jasmonic acid (JA). PMID:10758484, PMID:12887587	Transcription factor that binds specifically to a 5'-AA[AG]G-3' consensus core sequence. Enhances the DNA binding of OBF transcription factors to OCS elements. PMID:12887587
AAAGT	109	+	1	DOF3.6 OBP3, At3g55370	Dof	A. thaliana	Induced by auxin and salicylic acid (SA). Repressed by jasmonic acid (JA). PMID:10758484, PMID:12887587	Transcription factor that binds specifically to a 5'-AA[AG]G-3' consensus core sequence. Enhances the DNA binding of OBF transcription factors to OCS elements. PMID:12887587
ACCTT	158	-	1	DOF3.6 OBP3, At3g55370	Dof	A. thaliana	Induced by auxin and salicylic acid (SA). Repressed by jasmonic acid (JA). PMID:10758484, PMID:12887587	Transcription factor that binds specifically to a 5'-AA[AG]G-3' consensus core sequence. Enhances the DNA binding of OBF transcription factors to OCS elements. PMID:12887587
ACCTT	184	-	1	DOF3.6 OBP3, At3g55370	Dof	A. thaliana	Induced by auxin and salicylic acid (SA). Repressed by jasmonic acid (JA). PMID:10758484, PMID:12887587	Transcription factor that binds specifically to a 5'-AA[AG]G-3' consensus core sequence. Enhances the DNA binding of OBF transcription factors to OCS elements. PMID:12887587
TCTTT	252	-	1	DOF3.6 OBP3, At3g55370	Dof	A. thaliana	Induced by auxin and salicylic acid (SA). Repressed by jasmonic acid (JA). PMID:10758484, PMID:12887587	Transcription factor that binds specifically to a 5'-AA[AG]G-3' consensus core sequence. Enhances the DNA binding of OBF transcription factors to OCS elements. PMID:12887587
TCCTT	275	-	1	DOF3.6 OBP3, At3g55370	Dof	A. thaliana	Induced by auxin and salicylic acid (SA). Repressed by jasmonic acid (JA). PMID:10758484, PMID:12887587	Transcription factor that binds specifically to a 5'-AA[AG]G-3' consensus core sequence. Enhances the DNA binding of OBF transcription factors to OCS elements. PMID:12887587
TCTTT	328	-	1	DOF3.6 OBP3, At3g55370	Dof	A. thaliana	Induced by auxin and salicylic acid (SA). Repressed by jasmonic acid (JA). PMID:10758484, PMID:12887587	Transcription factor that binds specifically to a 5'-AA[AG]G-3' consensus core sequence. Enhances the DNA binding of OBF transcription factors to OCS elements. PMID:12887587
TCCTT	338	-	1	DOF3.6 OBP3, At3g55370	Dof	A. thaliana	Induced by auxin and salicylic acid (SA). Repressed by jasmonic acid (JA). PMID:10758484, PMID:12887587	Transcription factor that binds specifically to a 5'-AA[AG]G-3' consensus core sequence. Enhances the DNA binding of OBF transcription factors to OCS elements. PMID:12887587
GCTTT	369	-	1	DOF3.6 OBP3, At3g55370	Dof	A. thaliana	Induced by auxin and salicylic acid (SA). Repressed by jasmonic acid (JA). PMID:10758484, PMID:12887587	Transcription factor that binds specifically to a 5'-AA[AG]G-3' consensus core sequence. Enhances the DNA binding of OBF transcription factors to OCS elements. PMID:12887587
ACTTT	382	-	1	DOF3.6 OBP3, At3g55370	Dof	A. thaliana	Induced by auxin and salicylic acid (SA). Repressed by jasmonic acid (JA). PMID:10758484, PMID:12887587	Transcription factor that binds specifically to a 5'-AA[AG]G-3' consensus core sequence. Enhances the DNA binding of OBF transcription factors to OCS elements. PMID:12887587
AAAGC	400	+	1	DOF3.6 OBP3, At3g55370	Dof	A. thaliana	Induced by auxin and salicylic acid (SA). Repressed by jasmonic acid (JA). PMID:10758484, PMID:12887587	Transcription factor that binds specifically to a 5'-AA[AG]G-3' consensus core sequence. Enhances the DNA binding of OBF transcription factors to OCS elements. PMID:12887587
ACTTT	509	-	1	DOF3.6 OBP3, At3g55370	Dof	A. thaliana	Induced by auxin and salicylic acid (SA). Repressed by jasmonic acid (JA). PMID:10758484, PMID:12887587	Transcription factor that binds specifically to a 5'-AA[AG]G-3' consensus core sequence. Enhances the DNA binding of OBF transcription factors to OCS elements. PMID:12887587
AAAGC	571	+	1	DOF3.6 OBP3, At3g55370	Dof	A. thaliana	Induced by auxin and salicylic acid (SA). Repressed by jasmonic acid (JA). PMID:10758484, PMID:12887587	Transcription factor that binds specifically to a 5'-AA[AG]G-3' consensus core sequence. Enhances the DNA binding of OBF transcription factors to OCS elements. PMID:12887587
TCTTT	586	-	1	DOF3.6 OBP3, At3g55370	Dof	A. thaliana	Induced by auxin and salicylic acid (SA). Repressed by jasmonic acid (JA). PMID:10758484, PMID:12887587	Transcription factor that binds specifically to a 5'-AA[AG]G-3' consensus core sequence. Enhances the DNA binding of OBF transcription factors to OCS elements. PMID:12887587
ACCTT	605	-	1	DOF3.6 OBP3, At3g55370	Dof	A. thaliana	Induced by auxin and salicylic acid (SA). Repressed by jasmonic acid (JA). PMID:10758484, PMID:12887587	Transcription factor that binds specifically to a 5'-AA[AG]G-3' consensus core sequence. Enhances the DNA binding of OBF transcription factors to OCS elements. PMID:12887587
ACTTT	612	-	1	DOF3.6 OBP3, At3g55370	Dof	A. thaliana	Induced by auxin and salicylic acid (SA). Repressed by jasmonic acid (JA). PMID:10758484, PMID:12887587	Transcription factor that binds specifically to a 5'-AA[AG]G-3' consensus core sequence. Enhances the DNA binding of OBF transcription factors to OCS elements. PMID:12887587
TCCTT	806	-	1	DOF3.6 OBP3, At3g55370	Dof	A. thaliana	Induced by auxin and salicylic acid (SA). Repressed by jasmonic acid (JA). PMID:10758484, PMID:12887587	Transcription factor that binds specifically to a 5'-AA[AG]G-3' consensus core sequence. Enhances the DNA binding of OBF transcription factors to OCS elements. PMID:12887587
CCTTT	807	-	1	DOF3.6 OBP3, At3g55370	Dof	A. thaliana	Induced by auxin and salicylic acid (SA). Repressed by jasmonic acid (JA). PMID:10758484, PMID:12887587	Transcription factor that binds specifically to a 5'-AA[AG]G-3' consensus core sequence. Enhances the DNA binding of OBF transcription factors to OCS elements. PMID:12887587
TCTTT	874	-	1	DOF3.6 OBP3, At3g55370	Dof	A. thaliana	Induced by auxin and salicylic acid (SA). Repressed by jasmonic acid (JA). PMID:10758484, PMID:12887587	Transcription factor that binds specifically to a 5'-AA[AG]G-3' consensus core sequence. Enhances the DNA binding of OBF transcription factors to OCS elements. PMID:12887587
ACTTT	881	-	1	DOF3.6 OBP3, At3g55370	Dof	A. thaliana	Induced by auxin and salicylic acid (SA). Repressed by jasmonic acid (JA). PMID:10758484, PMID:12887587	Transcription factor that binds specifically to a 5'-AA[AG]G-3' consensus core sequence. Enhances the DNA binding of OBF transcription factors to OCS elements. PMID:12887587
AAAGA	939	+	1	DOF3.6 OBP3, At3g55370	Dof	A. thaliana	Induced by auxin and salicylic acid (SA). Repressed by jasmonic acid (JA). PMID:10758484, PMID:12887587	Transcription factor that binds specifically to a 5'-AA[AG]G-3' consensus core sequence. Enhances the DNA binding of OBF transcription factors to OCS elements. PMID:12887587
AAAGT	982	+	1	DOF3.6 OBP3, At3g55370	Dof	A. thaliana	Induced by auxin and salicylic acid (SA). Repressed by jasmonic acid (JA). PMID:10758484, PMID:12887587	Transcription factor that binds specifically to a 5'-AA[AG]G-3' consensus core sequence. Enhances the DNA binding of OBF transcription factors to OCS elements. PMID:12887587
ACTTT	1021	-	1	DOF3.6 OBP3, At3g55370	Dof	A. thaliana	Induced by auxin and salicylic acid (SA). Repressed by jasmonic acid (JA). PMID:10758484, PMID:12887587	Transcription factor that binds specifically to a 5'-AA[AG]G-3' consensus core sequence. Enhances the DNA binding of OBF transcription factors to OCS elements. PMID:12887587
AAAGG	1030	+	1	DOF3.6 OBP3, At3g55370	Dof	A. thaliana	Induced by auxin and salicylic acid (SA). Repressed by jasmonic acid (JA). PMID:10758484, PMID:12887587	Transcription factor that binds specifically to a 5'-AA[AG]G-3' consensus core sequence. Enhances the DNA binding of OBF transcription factors to OCS elements. PMID:12887587
AAGGG	1031	+	1	DOF3.6 OBP3, At3g55370	Dof	A. thaliana	Induced by auxin and salicylic acid (SA). Repressed by jasmonic acid (JA). PMID:10758484, PMID:12887587	Transcription factor that binds specifically to a 5'-AA[AG]G-3' consensus core sequence. Enhances the DNA binding of OBF transcription factors to OCS elements. PMID:12887587
TCCTT	1156	-	1	DOF3.6 OBP3, At3g55370	Dof	A. thaliana	Induced by auxin and salicylic acid (SA). Repressed by jasmonic acid (JA). PMID:10758484, PMID:12887587	Transcription factor that binds specifically to a 5'-AA[AG]G-3' consensus core sequence. Enhances the DNA binding of OBF transcription factors to OCS elements. PMID:12887587
AAAGG	1289	+	1	DOF3.6 OBP3, At3g55370	Dof	A. thaliana	Induced by auxin and salicylic acid (SA). Repressed by jasmonic acid (JA). PMID:10758484, PMID:12887587	Transcription factor that binds specifically to a 5'-AA[AG]G-3' consensus core sequence. Enhances the DNA binding of OBF transcription factors to OCS elements. PMID:12887587
AAGGC	1290	+	1	DOF3.6 OBP3, At3g55370	Dof	A. thaliana	Induced by auxin and salicylic acid (SA). Repressed by jasmonic acid (JA). PMID:10758484, PMID:12887587	Transcription factor that binds specifically to a 5'-AA[AG]G-3' consensus core sequence. Enhances the DNA binding of OBF transcription factors to OCS elements. PMID:12887587
ACTTT	1297	-	1	DOF3.6 OBP3, At3g55370	Dof	A. thaliana	Induced by auxin and salicylic acid (SA). Repressed by jasmonic acid (JA). PMID:10758484, PMID:12887587	Transcription factor that binds specifically to a 5'-AA[AG]G-3' consensus core sequence. Enhances the DNA binding of OBF transcription factors to OCS elements. PMID:12887587
AAAGG	1371	+	1	DOF3.6 OBP3, At3g55370	Dof	A. thaliana	Induced by auxin and salicylic acid (SA). Repressed by jasmonic acid (JA). PMID:10758484, PMID:12887587	Transcription factor that binds specifically to a 5'-AA[AG]G-3' consensus core sequence. Enhances the DNA binding of OBF transcription factors to OCS elements. PMID:12887587
AAGGA	1372	+	1	DOF3.6 OBP3, At3g55370	Dof	A. thaliana	Induced by auxin and salicylic acid (SA). Repressed by jasmonic acid (JA). PMID:10758484, PMID:12887587	Transcription factor that binds specifically to a 5'-AA[AG]G-3' consensus core sequence. Enhances the DNA binding of OBF transcription factors to OCS elements. PMID:12887587
AAAGA	1413	+	1	DOF3.6 OBP3, At3g55370	Dof	A. thaliana	Induced by auxin and salicylic acid (SA). Repressed by jasmonic acid (JA). PMID:10758484, PMID:12887587	Transcription factor that binds specifically to a 5'-AA[AG]G-3' consensus core sequence. Enhances the DNA binding of OBF transcription factors to OCS elements. PMID:12887587
AAAGA	1420	+	1	DOF3.6 OBP3, At3g55370	Dof	A. thaliana	Induced by auxin and salicylic acid (SA). Repressed by jasmonic acid (JA). PMID:10758484, PMID:12887587	Transcription factor that binds specifically to a 5'-AA[AG]G-3' consensus core sequence. Enhances the DNA binding of OBF transcription factors to OCS elements. PMID:12887587
GCCTT	79	-	1	DOF3.7 BBFA, DAG1, At3g61850	Dof	A. thaliana		Transcription factor specifically involved in the maternal control of seed germination. Regulates transcription by binding to a 5'-AA[AG]G-3' consensus core sequence. May ensure the inactivity of a component that would be activated to trigger germination as a consequence of red light perception. The regulatory role of DOF3.7/DAG1 appears to be opposite to that of DOF2.5/DAG2. Both zinc finger pro…
CCTTT	80	-	1	DOF3.7 BBFA, DAG1, At3g61850	Dof	A. thaliana		Transcription factor specifically involved in the maternal control of seed germination. Regulates transcription by binding to a 5'-AA[AG]G-3' consensus core sequence. May ensure the inactivity of a component that would be activated to trigger germination as a consequence of red light perception. The regulatory role of DOF3.7/DAG1 appears to be opposite to that of DOF2.5/DAG2. Both zinc finger pro…
AAAGT	109	+	1	DOF3.7 BBFA, DAG1, At3g61850	Dof	A. thaliana		Transcription factor specifically involved in the maternal control of seed germination. Regulates transcription by binding to a 5'-AA[AG]G-3' consensus core sequence. May ensure the inactivity of a component that would be activated to trigger germination as a consequence of red light perception. The regulatory role of DOF3.7/DAG1 appears to be opposite to that of DOF2.5/DAG2. Both zinc finger pro…
ACCTT	158	-	1	DOF3.7 BBFA, DAG1, At3g61850	Dof	A. thaliana		Transcription factor specifically involved in the maternal control of seed germination. Regulates transcription by binding to a 5'-AA[AG]G-3' consensus core sequence. May ensure the inactivity of a component that would be activated to trigger germination as a consequence of red light perception. The regulatory role of DOF3.7/DAG1 appears to be opposite to that of DOF2.5/DAG2. Both zinc finger pro…
ACCTT	184	-	1	DOF3.7 BBFA, DAG1, At3g61850	Dof	A. thaliana		Transcription factor specifically involved in the maternal control of seed germination. Regulates transcription by binding to a 5'-AA[AG]G-3' consensus core sequence. May ensure the inactivity of a component that would be activated to trigger germination as a consequence of red light perception. The regulatory role of DOF3.7/DAG1 appears to be opposite to that of DOF2.5/DAG2. Both zinc finger pro…
TCTTT	252	-	1	DOF3.7 BBFA, DAG1, At3g61850	Dof	A. thaliana		Transcription factor specifically involved in the maternal control of seed germination. Regulates transcription by binding to a 5'-AA[AG]G-3' consensus core sequence. May ensure the inactivity of a component that would be activated to trigger germination as a consequence of red light perception. The regulatory role of DOF3.7/DAG1 appears to be opposite to that of DOF2.5/DAG2. Both zinc finger pro…
TCCTT	275	-	1	DOF3.7 BBFA, DAG1, At3g61850	Dof	A. thaliana		Transcription factor specifically involved in the maternal control of seed germination. Regulates transcription by binding to a 5'-AA[AG]G-3' consensus core sequence. May ensure the inactivity of a component that would be activated to trigger germination as a consequence of red light perception. The regulatory role of DOF3.7/DAG1 appears to be opposite to that of DOF2.5/DAG2. Both zinc finger pro…
TCTTT	328	-	1	DOF3.7 BBFA, DAG1, At3g61850	Dof	A. thaliana		Transcription factor specifically involved in the maternal control of seed germination. Regulates transcription by binding to a 5'-AA[AG]G-3' consensus core sequence. May ensure the inactivity of a component that would be activated to trigger germination as a consequence of red light perception. The regulatory role of DOF3.7/DAG1 appears to be opposite to that of DOF2.5/DAG2. Both zinc finger pro…
TCCTT	338	-	1	DOF3.7 BBFA, DAG1, At3g61850	Dof	A. thaliana		Transcription factor specifically involved in the maternal control of seed germination. Regulates transcription by binding to a 5'-AA[AG]G-3' consensus core sequence. May ensure the inactivity of a component that would be activated to trigger germination as a consequence of red light perception. The regulatory role of DOF3.7/DAG1 appears to be opposite to that of DOF2.5/DAG2. Both zinc finger pro…
GCTTT	369	-	1	DOF3.7 BBFA, DAG1, At3g61850	Dof	A. thaliana		Transcription factor specifically involved in the maternal control of seed germination. Regulates transcription by binding to a 5'-AA[AG]G-3' consensus core sequence. May ensure the inactivity of a component that would be activated to trigger germination as a consequence of red light perception. The regulatory role of DOF3.7/DAG1 appears to be opposite to that of DOF2.5/DAG2. Both zinc finger pro…
ACTTT	382	-	1	DOF3.7 BBFA, DAG1, At3g61850	Dof	A. thaliana		Transcription factor specifically involved in the maternal control of seed germination. Regulates transcription by binding to a 5'-AA[AG]G-3' consensus core sequence. May ensure the inactivity of a component that would be activated to trigger germination as a consequence of red light perception. The regulatory role of DOF3.7/DAG1 appears to be opposite to that of DOF2.5/DAG2. Both zinc finger pro…
AAAGC	400	+	1	DOF3.7 BBFA, DAG1, At3g61850	Dof	A. thaliana		Transcription factor specifically involved in the maternal control of seed germination. Regulates transcription by binding to a 5'-AA[AG]G-3' consensus core sequence. May ensure the inactivity of a component that would be activated to trigger germination as a consequence of red light perception. The regulatory role of DOF3.7/DAG1 appears to be opposite to that of DOF2.5/DAG2. Both zinc finger pro…
ACTTT	509	-	1	DOF3.7 BBFA, DAG1, At3g61850	Dof	A. thaliana		Transcription factor specifically involved in the maternal control of seed germination. Regulates transcription by binding to a 5'-AA[AG]G-3' consensus core sequence. May ensure the inactivity of a component that would be activated to trigger germination as a consequence of red light perception. The regulatory role of DOF3.7/DAG1 appears to be opposite to that of DOF2.5/DAG2. Both zinc finger pro…
AAAGC	571	+	1	DOF3.7 BBFA, DAG1, At3g61850	Dof	A. thaliana		Transcription factor specifically involved in the maternal control of seed germination. Regulates transcription by binding to a 5'-AA[AG]G-3' consensus core sequence. May ensure the inactivity of a component that would be activated to trigger germination as a consequence of red light perception. The regulatory role of DOF3.7/DAG1 appears to be opposite to that of DOF2.5/DAG2. Both zinc finger pro…
TCTTT	586	-	1	DOF3.7 BBFA, DAG1, At3g61850	Dof	A. thaliana		Transcription factor specifically involved in the maternal control of seed germination. Regulates transcription by binding to a 5'-AA[AG]G-3' consensus core sequence. May ensure the inactivity of a component that would be activated to trigger germination as a consequence of red light perception. The regulatory role of DOF3.7/DAG1 appears to be opposite to that of DOF2.5/DAG2. Both zinc finger pro…
ACCTT	605	-	1	DOF3.7 BBFA, DAG1, At3g61850	Dof	A. thaliana		Transcription factor specifically involved in the maternal control of seed germination. Regulates transcription by binding to a 5'-AA[AG]G-3' consensus core sequence. May ensure the inactivity of a component that would be activated to trigger germination as a consequence of red light perception. The regulatory role of DOF3.7/DAG1 appears to be opposite to that of DOF2.5/DAG2. Both zinc finger pro…
ACTTT	612	-	1	DOF3.7 BBFA, DAG1, At3g61850	Dof	A. thaliana		Transcription factor specifically involved in the maternal control of seed germination. Regulates transcription by binding to a 5'-AA[AG]G-3' consensus core sequence. May ensure the inactivity of a component that would be activated to trigger germination as a consequence of red light perception. The regulatory role of DOF3.7/DAG1 appears to be opposite to that of DOF2.5/DAG2. Both zinc finger pro…
TCCTT	806	-	1	DOF3.7 BBFA, DAG1, At3g61850	Dof	A. thaliana		Transcription factor specifically involved in the maternal control of seed germination. Regulates transcription by binding to a 5'-AA[AG]G-3' consensus core sequence. May ensure the inactivity of a component that would be activated to trigger germination as a consequence of red light perception. The regulatory role of DOF3.7/DAG1 appears to be opposite to that of DOF2.5/DAG2. Both zinc finger pro…
CCTTT	807	-	1	DOF3.7 BBFA, DAG1, At3g61850	Dof	A. thaliana		Transcription factor specifically involved in the maternal control of seed germination. Regulates transcription by binding to a 5'-AA[AG]G-3' consensus core sequence. May ensure the inactivity of a component that would be activated to trigger germination as a consequence of red light perception. The regulatory role of DOF3.7/DAG1 appears to be opposite to that of DOF2.5/DAG2. Both zinc finger pro…
TCTTT	874	-	1	DOF3.7 BBFA, DAG1, At3g61850	Dof	A. thaliana		Transcription factor specifically involved in the maternal control of seed germination. Regulates transcription by binding to a 5'-AA[AG]G-3' consensus core sequence. May ensure the inactivity of a component that would be activated to trigger germination as a consequence of red light perception. The regulatory role of DOF3.7/DAG1 appears to be opposite to that of DOF2.5/DAG2. Both zinc finger pro…
ACTTT	881	-	1	DOF3.7 BBFA, DAG1, At3g61850	Dof	A. thaliana		Transcription factor specifically involved in the maternal control of seed germination. Regulates transcription by binding to a 5'-AA[AG]G-3' consensus core sequence. May ensure the inactivity of a component that would be activated to trigger germination as a consequence of red light perception. The regulatory role of DOF3.7/DAG1 appears to be opposite to that of DOF2.5/DAG2. Both zinc finger pro…
AAAGA	939	+	1	DOF3.7 BBFA, DAG1, At3g61850	Dof	A. thaliana		Transcription factor specifically involved in the maternal control of seed germination. Regulates transcription by binding to a 5'-AA[AG]G-3' consensus core sequence. May ensure the inactivity of a component that would be activated to trigger germination as a consequence of red light perception. The regulatory role of DOF3.7/DAG1 appears to be opposite to that of DOF2.5/DAG2. Both zinc finger pro…
AAAGT	982	+	1	DOF3.7 BBFA, DAG1, At3g61850	Dof	A. thaliana		Transcription factor specifically involved in the maternal control of seed germination. Regulates transcription by binding to a 5'-AA[AG]G-3' consensus core sequence. May ensure the inactivity of a component that would be activated to trigger germination as a consequence of red light perception. The regulatory role of DOF3.7/DAG1 appears to be opposite to that of DOF2.5/DAG2. Both zinc finger pro…
ACTTT	1021	-	1	DOF3.7 BBFA, DAG1, At3g61850	Dof	A. thaliana		Transcription factor specifically involved in the maternal control of seed germination. Regulates transcription by binding to a 5'-AA[AG]G-3' consensus core sequence. May ensure the inactivity of a component that would be activated to trigger germination as a consequence of red light perception. The regulatory role of DOF3.7/DAG1 appears to be opposite to that of DOF2.5/DAG2. Both zinc finger pro…
AAAGG	1030	+	1	DOF3.7 BBFA, DAG1, At3g61850	Dof	A. thaliana		Transcription factor specifically involved in the maternal control of seed germination. Regulates transcription by binding to a 5'-AA[AG]G-3' consensus core sequence. May ensure the inactivity of a component that would be activated to trigger germination as a consequence of red light perception. The regulatory role of DOF3.7/DAG1 appears to be opposite to that of DOF2.5/DAG2. Both zinc finger pro…
AAGGG	1031	+	1	DOF3.7 BBFA, DAG1, At3g61850	Dof	A. thaliana		Transcription factor specifically involved in the maternal control of seed germination. Regulates transcription by binding to a 5'-AA[AG]G-3' consensus core sequence. May ensure the inactivity of a component that would be activated to trigger germination as a consequence of red light perception. The regulatory role of DOF3.7/DAG1 appears to be opposite to that of DOF2.5/DAG2. Both zinc finger pro…
TCCTT	1156	-	1	DOF3.7 BBFA, DAG1, At3g61850	Dof	A. thaliana		Transcription factor specifically involved in the maternal control of seed germination. Regulates transcription by binding to a 5'-AA[AG]G-3' consensus core sequence. May ensure the inactivity of a component that would be activated to trigger germination as a consequence of red light perception. The regulatory role of DOF3.7/DAG1 appears to be opposite to that of DOF2.5/DAG2. Both zinc finger pro…
AAAGG	1289	+	1	DOF3.7 BBFA, DAG1, At3g61850	Dof	A. thaliana		Transcription factor specifically involved in the maternal control of seed germination. Regulates transcription by binding to a 5'-AA[AG]G-3' consensus core sequence. May ensure the inactivity of a component that would be activated to trigger germination as a consequence of red light perception. The regulatory role of DOF3.7/DAG1 appears to be opposite to that of DOF2.5/DAG2. Both zinc finger pro…
AAGGC	1290	+	1	DOF3.7 BBFA, DAG1, At3g61850	Dof	A. thaliana		Transcription factor specifically involved in the maternal control of seed germination. Regulates transcription by binding to a 5'-AA[AG]G-3' consensus core sequence. May ensure the inactivity of a component that would be activated to trigger germination as a consequence of red light perception. The regulatory role of DOF3.7/DAG1 appears to be opposite to that of DOF2.5/DAG2. Both zinc finger pro…
ACTTT	1297	-	1	DOF3.7 BBFA, DAG1, At3g61850	Dof	A. thaliana		Transcription factor specifically involved in the maternal control of seed germination. Regulates transcription by binding to a 5'-AA[AG]G-3' consensus core sequence. May ensure the inactivity of a component that would be activated to trigger germination as a consequence of red light perception. The regulatory role of DOF3.7/DAG1 appears to be opposite to that of DOF2.5/DAG2. Both zinc finger pro…
AAAGG	1371	+	1	DOF3.7 BBFA, DAG1, At3g61850	Dof	A. thaliana		Transcription factor specifically involved in the maternal control of seed germination. Regulates transcription by binding to a 5'-AA[AG]G-3' consensus core sequence. May ensure the inactivity of a component that would be activated to trigger germination as a consequence of red light perception. The regulatory role of DOF3.7/DAG1 appears to be opposite to that of DOF2.5/DAG2. Both zinc finger pro…
AAGGA	1372	+	1	DOF3.7 BBFA, DAG1, At3g61850	Dof	A. thaliana		Transcription factor specifically involved in the maternal control of seed germination. Regulates transcription by binding to a 5'-AA[AG]G-3' consensus core sequence. May ensure the inactivity of a component that would be activated to trigger germination as a consequence of red light perception. The regulatory role of DOF3.7/DAG1 appears to be opposite to that of DOF2.5/DAG2. Both zinc finger pro…
AAAGA	1413	+	1	DOF3.7 BBFA, DAG1, At3g61850	Dof	A. thaliana		Transcription factor specifically involved in the maternal control of seed germination. Regulates transcription by binding to a 5'-AA[AG]G-3' consensus core sequence. May ensure the inactivity of a component that would be activated to trigger germination as a consequence of red light perception. The regulatory role of DOF3.7/DAG1 appears to be opposite to that of DOF2.5/DAG2. Both zinc finger pro…
AAAGA	1420	+	1	DOF3.7 BBFA, DAG1, At3g61850	Dof	A. thaliana		Transcription factor specifically involved in the maternal control of seed germination. Regulates transcription by binding to a 5'-AA[AG]G-3' consensus core sequence. May ensure the inactivity of a component that would be activated to trigger germination as a consequence of red light perception. The regulatory role of DOF3.7/DAG1 appears to be opposite to that of DOF2.5/DAG2. Both zinc finger pro…
GCCTT	79	-	1	DOF4.1 At4g00940	Dof	A. thaliana
CCTTT	80	-	1	DOF4.1 At4g00940	Dof	A. thaliana
AAAGT	109	+	1	DOF4.1 At4g00940	Dof	A. thaliana
ACCTT	158	-	1	DOF4.1 At4g00940	Dof	A. thaliana
ACCTT	184	-	1	DOF4.1 At4g00940	Dof	A. thaliana
TCTTT	252	-	1	DOF4.1 At4g00940	Dof	A. thaliana
TCCTT	275	-	1	DOF4.1 At4g00940	Dof	A. thaliana
TCTTT	328	-	1	DOF4.1 At4g00940	Dof	A. thaliana
TCCTT	338	-	1	DOF4.1 At4g00940	Dof	A. thaliana
GCTTT	369	-	1	DOF4.1 At4g00940	Dof	A. thaliana
ACTTT	382	-	1	DOF4.1 At4g00940	Dof	A. thaliana
AAAGC	400	+	1	DOF4.1 At4g00940	Dof	A. thaliana
ACTTT	509	-	1	DOF4.1 At4g00940	Dof	A. thaliana
AAAGC	571	+	1	DOF4.1 At4g00940	Dof	A. thaliana
TCTTT	586	-	1	DOF4.1 At4g00940	Dof	A. thaliana
ACCTT	605	-	1	DOF4.1 At4g00940	Dof	A. thaliana
ACTTT	612	-	1	DOF4.1 At4g00940	Dof	A. thaliana
TCCTT	806	-	1	DOF4.1 At4g00940	Dof	A. thaliana
CCTTT	807	-	1	DOF4.1 At4g00940	Dof	A. thaliana
TCTTT	874	-	1	DOF4.1 At4g00940	Dof	A. thaliana
ACTTT	881	-	1	DOF4.1 At4g00940	Dof	A. thaliana
AAAGA	939	+	1	DOF4.1 At4g00940	Dof	A. thaliana
AAAGT	982	+	1	DOF4.1 At4g00940	Dof	A. thaliana
ACTTT	1021	-	1	DOF4.1 At4g00940	Dof	A. thaliana
AAAGG	1030	+	1	DOF4.1 At4g00940	Dof	A. thaliana
AAGGG	1031	+	1	DOF4.1 At4g00940	Dof	A. thaliana
TCCTT	1156	-	1	DOF4.1 At4g00940	Dof	A. thaliana
AAAGG	1289	+	1	DOF4.1 At4g00940	Dof	A. thaliana
AAGGC	1290	+	1	DOF4.1 At4g00940	Dof	A. thaliana
ACTTT	1297	-	1	DOF4.1 At4g00940	Dof	A. thaliana
AAAGG	1371	+	1	DOF4.1 At4g00940	Dof	A. thaliana
AAGGA	1372	+	1	DOF4.1 At4g00940	Dof	A. thaliana
AAAGA	1413	+	1	DOF4.1 At4g00940	Dof	A. thaliana
AAAGA	1420	+	1	DOF4.1 At4g00940	Dof	A. thaliana
GCCTT	79	-	1	DOF4.4 At4g21050	Dof	A. thaliana		Transcription factor that binds specifically to a 5'-AA[AG]G-3' consensus core sequence. fruit development 23095045, regulation of secondary shoot formation 23095045
CCTTT	80	-	1	DOF4.4 At4g21050	Dof	A. thaliana		Transcription factor that binds specifically to a 5'-AA[AG]G-3' consensus core sequence. fruit development 23095045, regulation of secondary shoot formation 23095045
AAAGT	109	+	1	DOF4.4 At4g21050	Dof	A. thaliana		Transcription factor that binds specifically to a 5'-AA[AG]G-3' consensus core sequence. fruit development 23095045, regulation of secondary shoot formation 23095045
ACCTT	158	-	1	DOF4.4 At4g21050	Dof	A. thaliana		Transcription factor that binds specifically to a 5'-AA[AG]G-3' consensus core sequence. fruit development 23095045, regulation of secondary shoot formation 23095045
ACCTT	184	-	1	DOF4.4 At4g21050	Dof	A. thaliana		Transcription factor that binds specifically to a 5'-AA[AG]G-3' consensus core sequence. fruit development 23095045, regulation of secondary shoot formation 23095045
TCTTT	252	-	1	DOF4.4 At4g21050	Dof	A. thaliana		Transcription factor that binds specifically to a 5'-AA[AG]G-3' consensus core sequence. fruit development 23095045, regulation of secondary shoot formation 23095045
TCCTT	275	-	1	DOF4.4 At4g21050	Dof	A. thaliana		Transcription factor that binds specifically to a 5'-AA[AG]G-3' consensus core sequence. fruit development 23095045, regulation of secondary shoot formation 23095045
TCTTT	328	-	1	DOF4.4 At4g21050	Dof	A. thaliana		Transcription factor that binds specifically to a 5'-AA[AG]G-3' consensus core sequence. fruit development 23095045, regulation of secondary shoot formation 23095045
TCCTT	338	-	1	DOF4.4 At4g21050	Dof	A. thaliana		Transcription factor that binds specifically to a 5'-AA[AG]G-3' consensus core sequence. fruit development 23095045, regulation of secondary shoot formation 23095045
GCTTT	369	-	1	DOF4.4 At4g21050	Dof	A. thaliana		Transcription factor that binds specifically to a 5'-AA[AG]G-3' consensus core sequence. fruit development 23095045, regulation of secondary shoot formation 23095045
ACTTT	382	-	1	DOF4.4 At4g21050	Dof	A. thaliana		Transcription factor that binds specifically to a 5'-AA[AG]G-3' consensus core sequence. fruit development 23095045, regulation of secondary shoot formation 23095045
AAAGC	400	+	1	DOF4.4 At4g21050	Dof	A. thaliana		Transcription factor that binds specifically to a 5'-AA[AG]G-3' consensus core sequence. fruit development 23095045, regulation of secondary shoot formation 23095045
ACTTT	509	-	1	DOF4.4 At4g21050	Dof	A. thaliana		Transcription factor that binds specifically to a 5'-AA[AG]G-3' consensus core sequence. fruit development 23095045, regulation of secondary shoot formation 23095045
AAAGC	571	+	1	DOF4.4 At4g21050	Dof	A. thaliana		Transcription factor that binds specifically to a 5'-AA[AG]G-3' consensus core sequence. fruit development 23095045, regulation of secondary shoot formation 23095045
TCTTT	586	-	1	DOF4.4 At4g21050	Dof	A. thaliana		Transcription factor that binds specifically to a 5'-AA[AG]G-3' consensus core sequence. fruit development 23095045, regulation of secondary shoot formation 23095045
ACCTT	605	-	1	DOF4.4 At4g21050	Dof	A. thaliana		Transcription factor that binds specifically to a 5'-AA[AG]G-3' consensus core sequence. fruit development 23095045, regulation of secondary shoot formation 23095045
ACTTT	612	-	1	DOF4.4 At4g21050	Dof	A. thaliana		Transcription factor that binds specifically to a 5'-AA[AG]G-3' consensus core sequence. fruit development 23095045, regulation of secondary shoot formation 23095045
TCCTT	806	-	1	DOF4.4 At4g21050	Dof	A. thaliana		Transcription factor that binds specifically to a 5'-AA[AG]G-3' consensus core sequence. fruit development 23095045, regulation of secondary shoot formation 23095045
CCTTT	807	-	1	DOF4.4 At4g21050	Dof	A. thaliana		Transcription factor that binds specifically to a 5'-AA[AG]G-3' consensus core sequence. fruit development 23095045, regulation of secondary shoot formation 23095045
TCTTT	874	-	1	DOF4.4 At4g21050	Dof	A. thaliana		Transcription factor that binds specifically to a 5'-AA[AG]G-3' consensus core sequence. fruit development 23095045, regulation of secondary shoot formation 23095045
ACTTT	881	-	1	DOF4.4 At4g21050	Dof	A. thaliana		Transcription factor that binds specifically to a 5'-AA[AG]G-3' consensus core sequence. fruit development 23095045, regulation of secondary shoot formation 23095045
AAAGA	939	+	1	DOF4.4 At4g21050	Dof	A. thaliana		Transcription factor that binds specifically to a 5'-AA[AG]G-3' consensus core sequence. fruit development 23095045, regulation of secondary shoot formation 23095045
AAAGT	982	+	1	DOF4.4 At4g21050	Dof	A. thaliana		Transcription factor that binds specifically to a 5'-AA[AG]G-3' consensus core sequence. fruit development 23095045, regulation of secondary shoot formation 23095045
ACTTT	1021	-	1	DOF4.4 At4g21050	Dof	A. thaliana		Transcription factor that binds specifically to a 5'-AA[AG]G-3' consensus core sequence. fruit development 23095045, regulation of secondary shoot formation 23095045
AAAGG	1030	+	1	DOF4.4 At4g21050	Dof	A. thaliana		Transcription factor that binds specifically to a 5'-AA[AG]G-3' consensus core sequence. fruit development 23095045, regulation of secondary shoot formation 23095045
AAGGG	1031	+	1	DOF4.4 At4g21050	Dof	A. thaliana		Transcription factor that binds specifically to a 5'-AA[AG]G-3' consensus core sequence. fruit development 23095045, regulation of secondary shoot formation 23095045
TCCTT	1156	-	1	DOF4.4 At4g21050	Dof	A. thaliana		Transcription factor that binds specifically to a 5'-AA[AG]G-3' consensus core sequence. fruit development 23095045, regulation of secondary shoot formation 23095045
AAAGG	1289	+	1	DOF4.4 At4g21050	Dof	A. thaliana		Transcription factor that binds specifically to a 5'-AA[AG]G-3' consensus core sequence. fruit development 23095045, regulation of secondary shoot formation 23095045
AAGGC	1290	+	1	DOF4.4 At4g21050	Dof	A. thaliana		Transcription factor that binds specifically to a 5'-AA[AG]G-3' consensus core sequence. fruit development 23095045, regulation of secondary shoot formation 23095045
ACTTT	1297	-	1	DOF4.4 At4g21050	Dof	A. thaliana		Transcription factor that binds specifically to a 5'-AA[AG]G-3' consensus core sequence. fruit development 23095045, regulation of secondary shoot formation 23095045
AAAGG	1371	+	1	DOF4.4 At4g21050	Dof	A. thaliana		Transcription factor that binds specifically to a 5'-AA[AG]G-3' consensus core sequence. fruit development 23095045, regulation of secondary shoot formation 23095045
AAGGA	1372	+	1	DOF4.4 At4g21050	Dof	A. thaliana		Transcription factor that binds specifically to a 5'-AA[AG]G-3' consensus core sequence. fruit development 23095045, regulation of secondary shoot formation 23095045
AAAGA	1413	+	1	DOF4.4 At4g21050	Dof	A. thaliana		Transcription factor that binds specifically to a 5'-AA[AG]G-3' consensus core sequence. fruit development 23095045, regulation of secondary shoot formation 23095045
AAAGA	1420	+	1	DOF4.4 At4g21050	Dof	A. thaliana		Transcription factor that binds specifically to a 5'-AA[AG]G-3' consensus core sequence. fruit development 23095045, regulation of secondary shoot formation 23095045
GCCTT	79	-	1	DOF4.5 At4g21080	Dof	A. thaliana
CCTTT	80	-	1	DOF4.5 At4g21080	Dof	A. thaliana
AAAGT	109	+	1	DOF4.5 At4g21080	Dof	A. thaliana
ACCTT	158	-	1	DOF4.5 At4g21080	Dof	A. thaliana
ACCTT	184	-	1	DOF4.5 At4g21080	Dof	A. thaliana
TCTTT	252	-	1	DOF4.5 At4g21080	Dof	A. thaliana
TCCTT	275	-	1	DOF4.5 At4g21080	Dof	A. thaliana
TCTTT	328	-	1	DOF4.5 At4g21080	Dof	A. thaliana
TCCTT	338	-	1	DOF4.5 At4g21080	Dof	A. thaliana
GCTTT	369	-	1	DOF4.5 At4g21080	Dof	A. thaliana
ACTTT	382	-	1	DOF4.5 At4g21080	Dof	A. thaliana
AAAGC	400	+	1	DOF4.5 At4g21080	Dof	A. thaliana
ACTTT	509	-	1	DOF4.5 At4g21080	Dof	A. thaliana
AAAGC	571	+	1	DOF4.5 At4g21080	Dof	A. thaliana
TCTTT	586	-	1	DOF4.5 At4g21080	Dof	A. thaliana
ACCTT	605	-	1	DOF4.5 At4g21080	Dof	A. thaliana
ACTTT	612	-	1	DOF4.5 At4g21080	Dof	A. thaliana
TCCTT	806	-	1	DOF4.5 At4g21080	Dof	A. thaliana
CCTTT	807	-	1	DOF4.5 At4g21080	Dof	A. thaliana
TCTTT	874	-	1	DOF4.5 At4g21080	Dof	A. thaliana
ACTTT	881	-	1	DOF4.5 At4g21080	Dof	A. thaliana
AAAGA	939	+	1	DOF4.5 At4g21080	Dof	A. thaliana
AAAGT	982	+	1	DOF4.5 At4g21080	Dof	A. thaliana
ACTTT	1021	-	1	DOF4.5 At4g21080	Dof	A. thaliana
AAAGG	1030	+	1	DOF4.5 At4g21080	Dof	A. thaliana
AAGGG	1031	+	1	DOF4.5 At4g21080	Dof	A. thaliana
TCCTT	1156	-	1	DOF4.5 At4g21080	Dof	A. thaliana
AAAGG	1289	+	1	DOF4.5 At4g21080	Dof	A. thaliana
AAGGC	1290	+	1	DOF4.5 At4g21080	Dof	A. thaliana
ACTTT	1297	-	1	DOF4.5 At4g21080	Dof	A. thaliana
AAAGG	1371	+	1	DOF4.5 At4g21080	Dof	A. thaliana
AAGGA	1372	+	1	DOF4.5 At4g21080	Dof	A. thaliana
AAAGA	1413	+	1	DOF4.5 At4g21080	Dof	A. thaliana
AAAGA	1420	+	1	DOF4.5 At4g21080	Dof	A. thaliana
GCCTT	79	-	1	DOF4.6 At4g24060	Dof	A. thaliana
CCTTT	80	-	1	DOF4.6 At4g24060	Dof	A. thaliana
AAAGT	109	+	1	DOF4.6 At4g24060	Dof	A. thaliana
ACCTT	158	-	1	DOF4.6 At4g24060	Dof	A. thaliana
ACCTT	184	-	1	DOF4.6 At4g24060	Dof	A. thaliana
TCTTT	252	-	1	DOF4.6 At4g24060	Dof	A. thaliana
TCCTT	275	-	1	DOF4.6 At4g24060	Dof	A. thaliana
TCTTT	328	-	1	DOF4.6 At4g24060	Dof	A. thaliana
TCCTT	338	-	1	DOF4.6 At4g24060	Dof	A. thaliana
GCTTT	369	-	1	DOF4.6 At4g24060	Dof	A. thaliana
ACTTT	382	-	1	DOF4.6 At4g24060	Dof	A. thaliana
AAAGC	400	+	1	DOF4.6 At4g24060	Dof	A. thaliana
ACTTT	509	-	1	DOF4.6 At4g24060	Dof	A. thaliana
AAAGC	571	+	1	DOF4.6 At4g24060	Dof	A. thaliana
TCTTT	586	-	1	DOF4.6 At4g24060	Dof	A. thaliana
ACCTT	605	-	1	DOF4.6 At4g24060	Dof	A. thaliana
ACTTT	612	-	1	DOF4.6 At4g24060	Dof	A. thaliana
TCCTT	806	-	1	DOF4.6 At4g24060	Dof	A. thaliana
CCTTT	807	-	1	DOF4.6 At4g24060	Dof	A. thaliana
TCTTT	874	-	1	DOF4.6 At4g24060	Dof	A. thaliana
ACTTT	881	-	1	DOF4.6 At4g24060	Dof	A. thaliana
AAAGA	939	+	1	DOF4.6 At4g24060	Dof	A. thaliana
AAAGT	982	+	1	DOF4.6 At4g24060	Dof	A. thaliana
ACTTT	1021	-	1	DOF4.6 At4g24060	Dof	A. thaliana
AAAGG	1030	+	1	DOF4.6 At4g24060	Dof	A. thaliana
AAGGG	1031	+	1	DOF4.6 At4g24060	Dof	A. thaliana
TCCTT	1156	-	1	DOF4.6 At4g24060	Dof	A. thaliana
AAAGG	1289	+	1	DOF4.6 At4g24060	Dof	A. thaliana
AAGGC	1290	+	1	DOF4.6 At4g24060	Dof	A. thaliana
ACTTT	1297	-	1	DOF4.6 At4g24060	Dof	A. thaliana
AAAGG	1371	+	1	DOF4.6 At4g24060	Dof	A. thaliana
AAGGA	1372	+	1	DOF4.6 At4g24060	Dof	A. thaliana
AAAGA	1413	+	1	DOF4.6 At4g24060	Dof	A. thaliana
AAAGA	1420	+	1	DOF4.6 At4g24060	Dof	A. thaliana
GCCTT	79	-	1	DOF5.1 At5g02460	Dof	A. thaliana
CCTTT	80	-	1	DOF5.1 At5g02460	Dof	A. thaliana
AAAGT	109	+	1	DOF5.1 At5g02460	Dof	A. thaliana
ACCTT	158	-	1	DOF5.1 At5g02460	Dof	A. thaliana
ACCTT	184	-	1	DOF5.1 At5g02460	Dof	A. thaliana
TCTTT	252	-	1	DOF5.1 At5g02460	Dof	A. thaliana
TCCTT	275	-	1	DOF5.1 At5g02460	Dof	A. thaliana
TCTTT	328	-	1	DOF5.1 At5g02460	Dof	A. thaliana
TCCTT	338	-	1	DOF5.1 At5g02460	Dof	A. thaliana
GCTTT	369	-	1	DOF5.1 At5g02460	Dof	A. thaliana
ACTTT	382	-	1	DOF5.1 At5g02460	Dof	A. thaliana
AAAGC	400	+	1	DOF5.1 At5g02460	Dof	A. thaliana
ACTTT	509	-	1	DOF5.1 At5g02460	Dof	A. thaliana
AAAGC	571	+	1	DOF5.1 At5g02460	Dof	A. thaliana
TCTTT	586	-	1	DOF5.1 At5g02460	Dof	A. thaliana
ACCTT	605	-	1	DOF5.1 At5g02460	Dof	A. thaliana
ACTTT	612	-	1	DOF5.1 At5g02460	Dof	A. thaliana
TCCTT	806	-	1	DOF5.1 At5g02460	Dof	A. thaliana
CCTTT	807	-	1	DOF5.1 At5g02460	Dof	A. thaliana
TCTTT	874	-	1	DOF5.1 At5g02460	Dof	A. thaliana
ACTTT	881	-	1	DOF5.1 At5g02460	Dof	A. thaliana
AAAGA	939	+	1	DOF5.1 At5g02460	Dof	A. thaliana
AAAGT	982	+	1	DOF5.1 At5g02460	Dof	A. thaliana
ACTTT	1021	-	1	DOF5.1 At5g02460	Dof	A. thaliana
AAAGG	1030	+	1	DOF5.1 At5g02460	Dof	A. thaliana
AAGGG	1031	+	1	DOF5.1 At5g02460	Dof	A. thaliana
TCCTT	1156	-	1	DOF5.1 At5g02460	Dof	A. thaliana
AAAGG	1289	+	1	DOF5.1 At5g02460	Dof	A. thaliana
AAGGC	1290	+	1	DOF5.1 At5g02460	Dof	A. thaliana
ACTTT	1297	-	1	DOF5.1 At5g02460	Dof	A. thaliana
AAAGG	1371	+	1	DOF5.1 At5g02460	Dof	A. thaliana
AAGGA	1372	+	1	DOF5.1 At5g02460	Dof	A. thaliana
AAAGA	1413	+	1	DOF5.1 At5g02460	Dof	A. thaliana
AAAGA	1420	+	1	DOF5.1 At5g02460	Dof	A. thaliana
GCCTT	79	-	1	CDF1 DOF5.5, At5g62430	Dof	A. thaliana	Circadian-regulation at the protein level, but not at the mRNA level. Strongly decreased expression during the dark phase. Accumulates at high levels at the beginning of the day. PMID:16002617	Transcription factor that binds specifically to a 5'-AA[AG]G-3' consensus core sequence. A flanking TGT sequence contributes to the specificity of binding. Regulates a photoperiodic flowering response. Transcriptional repressor of 'CONSTANS' expression. The DNA-binding ability is not modulated by 'GIGANTEA' but the stability of CDF1 is controlled by the proteasome-dependent pathway. Ubiquitinated…
CCTTT	80	-	1	CDF1 DOF5.5, At5g62430	Dof	A. thaliana	Circadian-regulation at the protein level, but not at the mRNA level. Strongly decreased expression during the dark phase. Accumulates at high levels at the beginning of the day. PMID:16002617	Transcription factor that binds specifically to a 5'-AA[AG]G-3' consensus core sequence. A flanking TGT sequence contributes to the specificity of binding. Regulates a photoperiodic flowering response. Transcriptional repressor of 'CONSTANS' expression. The DNA-binding ability is not modulated by 'GIGANTEA' but the stability of CDF1 is controlled by the proteasome-dependent pathway. Ubiquitinated…
AAAGT	109	+	1	CDF1 DOF5.5, At5g62430	Dof	A. thaliana	Circadian-regulation at the protein level, but not at the mRNA level. Strongly decreased expression during the dark phase. Accumulates at high levels at the beginning of the day. PMID:16002617	Transcription factor that binds specifically to a 5'-AA[AG]G-3' consensus core sequence. A flanking TGT sequence contributes to the specificity of binding. Regulates a photoperiodic flowering response. Transcriptional repressor of 'CONSTANS' expression. The DNA-binding ability is not modulated by 'GIGANTEA' but the stability of CDF1 is controlled by the proteasome-dependent pathway. Ubiquitinated…
ACCTT	158	-	1	CDF1 DOF5.5, At5g62430	Dof	A. thaliana	Circadian-regulation at the protein level, but not at the mRNA level. Strongly decreased expression during the dark phase. Accumulates at high levels at the beginning of the day. PMID:16002617	Transcription factor that binds specifically to a 5'-AA[AG]G-3' consensus core sequence. A flanking TGT sequence contributes to the specificity of binding. Regulates a photoperiodic flowering response. Transcriptional repressor of 'CONSTANS' expression. The DNA-binding ability is not modulated by 'GIGANTEA' but the stability of CDF1 is controlled by the proteasome-dependent pathway. Ubiquitinated…
ACCTT	184	-	1	CDF1 DOF5.5, At5g62430	Dof	A. thaliana	Circadian-regulation at the protein level, but not at the mRNA level. Strongly decreased expression during the dark phase. Accumulates at high levels at the beginning of the day. PMID:16002617	Transcription factor that binds specifically to a 5'-AA[AG]G-3' consensus core sequence. A flanking TGT sequence contributes to the specificity of binding. Regulates a photoperiodic flowering response. Transcriptional repressor of 'CONSTANS' expression. The DNA-binding ability is not modulated by 'GIGANTEA' but the stability of CDF1 is controlled by the proteasome-dependent pathway. Ubiquitinated…
TCTTT	252	-	1	CDF1 DOF5.5, At5g62430	Dof	A. thaliana	Circadian-regulation at the protein level, but not at the mRNA level. Strongly decreased expression during the dark phase. Accumulates at high levels at the beginning of the day. PMID:16002617	Transcription factor that binds specifically to a 5'-AA[AG]G-3' consensus core sequence. A flanking TGT sequence contributes to the specificity of binding. Regulates a photoperiodic flowering response. Transcriptional repressor of 'CONSTANS' expression. The DNA-binding ability is not modulated by 'GIGANTEA' but the stability of CDF1 is controlled by the proteasome-dependent pathway. Ubiquitinated…
TCCTT	275	-	1	CDF1 DOF5.5, At5g62430	Dof	A. thaliana	Circadian-regulation at the protein level, but not at the mRNA level. Strongly decreased expression during the dark phase. Accumulates at high levels at the beginning of the day. PMID:16002617	Transcription factor that binds specifically to a 5'-AA[AG]G-3' consensus core sequence. A flanking TGT sequence contributes to the specificity of binding. Regulates a photoperiodic flowering response. Transcriptional repressor of 'CONSTANS' expression. The DNA-binding ability is not modulated by 'GIGANTEA' but the stability of CDF1 is controlled by the proteasome-dependent pathway. Ubiquitinated…
TCTTT	328	-	1	CDF1 DOF5.5, At5g62430	Dof	A. thaliana	Circadian-regulation at the protein level, but not at the mRNA level. Strongly decreased expression during the dark phase. Accumulates at high levels at the beginning of the day. PMID:16002617	Transcription factor that binds specifically to a 5'-AA[AG]G-3' consensus core sequence. A flanking TGT sequence contributes to the specificity of binding. Regulates a photoperiodic flowering response. Transcriptional repressor of 'CONSTANS' expression. The DNA-binding ability is not modulated by 'GIGANTEA' but the stability of CDF1 is controlled by the proteasome-dependent pathway. Ubiquitinated…
TCCTT	338	-	1	CDF1 DOF5.5, At5g62430	Dof	A. thaliana	Circadian-regulation at the protein level, but not at the mRNA level. Strongly decreased expression during the dark phase. Accumulates at high levels at the beginning of the day. PMID:16002617	Transcription factor that binds specifically to a 5'-AA[AG]G-3' consensus core sequence. A flanking TGT sequence contributes to the specificity of binding. Regulates a photoperiodic flowering response. Transcriptional repressor of 'CONSTANS' expression. The DNA-binding ability is not modulated by 'GIGANTEA' but the stability of CDF1 is controlled by the proteasome-dependent pathway. Ubiquitinated…
GCTTT	369	-	1	CDF1 DOF5.5, At5g62430	Dof	A. thaliana	Circadian-regulation at the protein level, but not at the mRNA level. Strongly decreased expression during the dark phase. Accumulates at high levels at the beginning of the day. PMID:16002617	Transcription factor that binds specifically to a 5'-AA[AG]G-3' consensus core sequence. A flanking TGT sequence contributes to the specificity of binding. Regulates a photoperiodic flowering response. Transcriptional repressor of 'CONSTANS' expression. The DNA-binding ability is not modulated by 'GIGANTEA' but the stability of CDF1 is controlled by the proteasome-dependent pathway. Ubiquitinated…
ACTTT	382	-	1	CDF1 DOF5.5, At5g62430	Dof	A. thaliana	Circadian-regulation at the protein level, but not at the mRNA level. Strongly decreased expression during the dark phase. Accumulates at high levels at the beginning of the day. PMID:16002617	Transcription factor that binds specifically to a 5'-AA[AG]G-3' consensus core sequence. A flanking TGT sequence contributes to the specificity of binding. Regulates a photoperiodic flowering response. Transcriptional repressor of 'CONSTANS' expression. The DNA-binding ability is not modulated by 'GIGANTEA' but the stability of CDF1 is controlled by the proteasome-dependent pathway. Ubiquitinated…
AAAGC	400	+	1	CDF1 DOF5.5, At5g62430	Dof	A. thaliana	Circadian-regulation at the protein level, but not at the mRNA level. Strongly decreased expression during the dark phase. Accumulates at high levels at the beginning of the day. PMID:16002617	Transcription factor that binds specifically to a 5'-AA[AG]G-3' consensus core sequence. A flanking TGT sequence contributes to the specificity of binding. Regulates a photoperiodic flowering response. Transcriptional repressor of 'CONSTANS' expression. The DNA-binding ability is not modulated by 'GIGANTEA' but the stability of CDF1 is controlled by the proteasome-dependent pathway. Ubiquitinated…
ACTTT	509	-	1	CDF1 DOF5.5, At5g62430	Dof	A. thaliana	Circadian-regulation at the protein level, but not at the mRNA level. Strongly decreased expression during the dark phase. Accumulates at high levels at the beginning of the day. PMID:16002617	Transcription factor that binds specifically to a 5'-AA[AG]G-3' consensus core sequence. A flanking TGT sequence contributes to the specificity of binding. Regulates a photoperiodic flowering response. Transcriptional repressor of 'CONSTANS' expression. The DNA-binding ability is not modulated by 'GIGANTEA' but the stability of CDF1 is controlled by the proteasome-dependent pathway. Ubiquitinated…
AAAGC	571	+	1	CDF1 DOF5.5, At5g62430	Dof	A. thaliana	Circadian-regulation at the protein level, but not at the mRNA level. Strongly decreased expression during the dark phase. Accumulates at high levels at the beginning of the day. PMID:16002617	Transcription factor that binds specifically to a 5'-AA[AG]G-3' consensus core sequence. A flanking TGT sequence contributes to the specificity of binding. Regulates a photoperiodic flowering response. Transcriptional repressor of 'CONSTANS' expression. The DNA-binding ability is not modulated by 'GIGANTEA' but the stability of CDF1 is controlled by the proteasome-dependent pathway. Ubiquitinated…
TCTTT	586	-	1	CDF1 DOF5.5, At5g62430	Dof	A. thaliana	Circadian-regulation at the protein level, but not at the mRNA level. Strongly decreased expression during the dark phase. Accumulates at high levels at the beginning of the day. PMID:16002617	Transcription factor that binds specifically to a 5'-AA[AG]G-3' consensus core sequence. A flanking TGT sequence contributes to the specificity of binding. Regulates a photoperiodic flowering response. Transcriptional repressor of 'CONSTANS' expression. The DNA-binding ability is not modulated by 'GIGANTEA' but the stability of CDF1 is controlled by the proteasome-dependent pathway. Ubiquitinated…
ACCTT	605	-	1	CDF1 DOF5.5, At5g62430	Dof	A. thaliana	Circadian-regulation at the protein level, but not at the mRNA level. Strongly decreased expression during the dark phase. Accumulates at high levels at the beginning of the day. PMID:16002617	Transcription factor that binds specifically to a 5'-AA[AG]G-3' consensus core sequence. A flanking TGT sequence contributes to the specificity of binding. Regulates a photoperiodic flowering response. Transcriptional repressor of 'CONSTANS' expression. The DNA-binding ability is not modulated by 'GIGANTEA' but the stability of CDF1 is controlled by the proteasome-dependent pathway. Ubiquitinated…
ACTTT	612	-	1	CDF1 DOF5.5, At5g62430	Dof	A. thaliana	Circadian-regulation at the protein level, but not at the mRNA level. Strongly decreased expression during the dark phase. Accumulates at high levels at the beginning of the day. PMID:16002617	Transcription factor that binds specifically to a 5'-AA[AG]G-3' consensus core sequence. A flanking TGT sequence contributes to the specificity of binding. Regulates a photoperiodic flowering response. Transcriptional repressor of 'CONSTANS' expression. The DNA-binding ability is not modulated by 'GIGANTEA' but the stability of CDF1 is controlled by the proteasome-dependent pathway. Ubiquitinated…
TCCTT	806	-	1	CDF1 DOF5.5, At5g62430	Dof	A. thaliana	Circadian-regulation at the protein level, but not at the mRNA level. Strongly decreased expression during the dark phase. Accumulates at high levels at the beginning of the day. PMID:16002617	Transcription factor that binds specifically to a 5'-AA[AG]G-3' consensus core sequence. A flanking TGT sequence contributes to the specificity of binding. Regulates a photoperiodic flowering response. Transcriptional repressor of 'CONSTANS' expression. The DNA-binding ability is not modulated by 'GIGANTEA' but the stability of CDF1 is controlled by the proteasome-dependent pathway. Ubiquitinated…
CCTTT	807	-	1	CDF1 DOF5.5, At5g62430	Dof	A. thaliana	Circadian-regulation at the protein level, but not at the mRNA level. Strongly decreased expression during the dark phase. Accumulates at high levels at the beginning of the day. PMID:16002617	Transcription factor that binds specifically to a 5'-AA[AG]G-3' consensus core sequence. A flanking TGT sequence contributes to the specificity of binding. Regulates a photoperiodic flowering response. Transcriptional repressor of 'CONSTANS' expression. The DNA-binding ability is not modulated by 'GIGANTEA' but the stability of CDF1 is controlled by the proteasome-dependent pathway. Ubiquitinated…
TCTTT	874	-	1	CDF1 DOF5.5, At5g62430	Dof	A. thaliana	Circadian-regulation at the protein level, but not at the mRNA level. Strongly decreased expression during the dark phase. Accumulates at high levels at the beginning of the day. PMID:16002617	Transcription factor that binds specifically to a 5'-AA[AG]G-3' consensus core sequence. A flanking TGT sequence contributes to the specificity of binding. Regulates a photoperiodic flowering response. Transcriptional repressor of 'CONSTANS' expression. The DNA-binding ability is not modulated by 'GIGANTEA' but the stability of CDF1 is controlled by the proteasome-dependent pathway. Ubiquitinated…
ACTTT	881	-	1	CDF1 DOF5.5, At5g62430	Dof	A. thaliana	Circadian-regulation at the protein level, but not at the mRNA level. Strongly decreased expression during the dark phase. Accumulates at high levels at the beginning of the day. PMID:16002617	Transcription factor that binds specifically to a 5'-AA[AG]G-3' consensus core sequence. A flanking TGT sequence contributes to the specificity of binding. Regulates a photoperiodic flowering response. Transcriptional repressor of 'CONSTANS' expression. The DNA-binding ability is not modulated by 'GIGANTEA' but the stability of CDF1 is controlled by the proteasome-dependent pathway. Ubiquitinated…
AAAGA	939	+	1	CDF1 DOF5.5, At5g62430	Dof	A. thaliana	Circadian-regulation at the protein level, but not at the mRNA level. Strongly decreased expression during the dark phase. Accumulates at high levels at the beginning of the day. PMID:16002617	Transcription factor that binds specifically to a 5'-AA[AG]G-3' consensus core sequence. A flanking TGT sequence contributes to the specificity of binding. Regulates a photoperiodic flowering response. Transcriptional repressor of 'CONSTANS' expression. The DNA-binding ability is not modulated by 'GIGANTEA' but the stability of CDF1 is controlled by the proteasome-dependent pathway. Ubiquitinated…
AAAGT	982	+	1	CDF1 DOF5.5, At5g62430	Dof	A. thaliana	Circadian-regulation at the protein level, but not at the mRNA level. Strongly decreased expression during the dark phase. Accumulates at high levels at the beginning of the day. PMID:16002617	Transcription factor that binds specifically to a 5'-AA[AG]G-3' consensus core sequence. A flanking TGT sequence contributes to the specificity of binding. Regulates a photoperiodic flowering response. Transcriptional repressor of 'CONSTANS' expression. The DNA-binding ability is not modulated by 'GIGANTEA' but the stability of CDF1 is controlled by the proteasome-dependent pathway. Ubiquitinated…
ACTTT	1021	-	1	CDF1 DOF5.5, At5g62430	Dof	A. thaliana	Circadian-regulation at the protein level, but not at the mRNA level. Strongly decreased expression during the dark phase. Accumulates at high levels at the beginning of the day. PMID:16002617	Transcription factor that binds specifically to a 5'-AA[AG]G-3' consensus core sequence. A flanking TGT sequence contributes to the specificity of binding. Regulates a photoperiodic flowering response. Transcriptional repressor of 'CONSTANS' expression. The DNA-binding ability is not modulated by 'GIGANTEA' but the stability of CDF1 is controlled by the proteasome-dependent pathway. Ubiquitinated…
AAAGG	1030	+	1	CDF1 DOF5.5, At5g62430	Dof	A. thaliana	Circadian-regulation at the protein level, but not at the mRNA level. Strongly decreased expression during the dark phase. Accumulates at high levels at the beginning of the day. PMID:16002617	Transcription factor that binds specifically to a 5'-AA[AG]G-3' consensus core sequence. A flanking TGT sequence contributes to the specificity of binding. Regulates a photoperiodic flowering response. Transcriptional repressor of 'CONSTANS' expression. The DNA-binding ability is not modulated by 'GIGANTEA' but the stability of CDF1 is controlled by the proteasome-dependent pathway. Ubiquitinated…
AAGGG	1031	+	1	CDF1 DOF5.5, At5g62430	Dof	A. thaliana	Circadian-regulation at the protein level, but not at the mRNA level. Strongly decreased expression during the dark phase. Accumulates at high levels at the beginning of the day. PMID:16002617	Transcription factor that binds specifically to a 5'-AA[AG]G-3' consensus core sequence. A flanking TGT sequence contributes to the specificity of binding. Regulates a photoperiodic flowering response. Transcriptional repressor of 'CONSTANS' expression. The DNA-binding ability is not modulated by 'GIGANTEA' but the stability of CDF1 is controlled by the proteasome-dependent pathway. Ubiquitinated…
TCCTT	1156	-	1	CDF1 DOF5.5, At5g62430	Dof	A. thaliana	Circadian-regulation at the protein level, but not at the mRNA level. Strongly decreased expression during the dark phase. Accumulates at high levels at the beginning of the day. PMID:16002617	Transcription factor that binds specifically to a 5'-AA[AG]G-3' consensus core sequence. A flanking TGT sequence contributes to the specificity of binding. Regulates a photoperiodic flowering response. Transcriptional repressor of 'CONSTANS' expression. The DNA-binding ability is not modulated by 'GIGANTEA' but the stability of CDF1 is controlled by the proteasome-dependent pathway. Ubiquitinated…
AAAGG	1289	+	1	CDF1 DOF5.5, At5g62430	Dof	A. thaliana	Circadian-regulation at the protein level, but not at the mRNA level. Strongly decreased expression during the dark phase. Accumulates at high levels at the beginning of the day. PMID:16002617	Transcription factor that binds specifically to a 5'-AA[AG]G-3' consensus core sequence. A flanking TGT sequence contributes to the specificity of binding. Regulates a photoperiodic flowering response. Transcriptional repressor of 'CONSTANS' expression. The DNA-binding ability is not modulated by 'GIGANTEA' but the stability of CDF1 is controlled by the proteasome-dependent pathway. Ubiquitinated…
AAGGC	1290	+	1	CDF1 DOF5.5, At5g62430	Dof	A. thaliana	Circadian-regulation at the protein level, but not at the mRNA level. Strongly decreased expression during the dark phase. Accumulates at high levels at the beginning of the day. PMID:16002617	Transcription factor that binds specifically to a 5'-AA[AG]G-3' consensus core sequence. A flanking TGT sequence contributes to the specificity of binding. Regulates a photoperiodic flowering response. Transcriptional repressor of 'CONSTANS' expression. The DNA-binding ability is not modulated by 'GIGANTEA' but the stability of CDF1 is controlled by the proteasome-dependent pathway. Ubiquitinated…
ACTTT	1297	-	1	CDF1 DOF5.5, At5g62430	Dof	A. thaliana	Circadian-regulation at the protein level, but not at the mRNA level. Strongly decreased expression during the dark phase. Accumulates at high levels at the beginning of the day. PMID:16002617	Transcription factor that binds specifically to a 5'-AA[AG]G-3' consensus core sequence. A flanking TGT sequence contributes to the specificity of binding. Regulates a photoperiodic flowering response. Transcriptional repressor of 'CONSTANS' expression. The DNA-binding ability is not modulated by 'GIGANTEA' but the stability of CDF1 is controlled by the proteasome-dependent pathway. Ubiquitinated…
AAAGG	1371	+	1	CDF1 DOF5.5, At5g62430	Dof	A. thaliana	Circadian-regulation at the protein level, but not at the mRNA level. Strongly decreased expression during the dark phase. Accumulates at high levels at the beginning of the day. PMID:16002617	Transcription factor that binds specifically to a 5'-AA[AG]G-3' consensus core sequence. A flanking TGT sequence contributes to the specificity of binding. Regulates a photoperiodic flowering response. Transcriptional repressor of 'CONSTANS' expression. The DNA-binding ability is not modulated by 'GIGANTEA' but the stability of CDF1 is controlled by the proteasome-dependent pathway. Ubiquitinated…
AAGGA	1372	+	1	CDF1 DOF5.5, At5g62430	Dof	A. thaliana	Circadian-regulation at the protein level, but not at the mRNA level. Strongly decreased expression during the dark phase. Accumulates at high levels at the beginning of the day. PMID:16002617	Transcription factor that binds specifically to a 5'-AA[AG]G-3' consensus core sequence. A flanking TGT sequence contributes to the specificity of binding. Regulates a photoperiodic flowering response. Transcriptional repressor of 'CONSTANS' expression. The DNA-binding ability is not modulated by 'GIGANTEA' but the stability of CDF1 is controlled by the proteasome-dependent pathway. Ubiquitinated…
AAAGA	1413	+	1	CDF1 DOF5.5, At5g62430	Dof	A. thaliana	Circadian-regulation at the protein level, but not at the mRNA level. Strongly decreased expression during the dark phase. Accumulates at high levels at the beginning of the day. PMID:16002617	Transcription factor that binds specifically to a 5'-AA[AG]G-3' consensus core sequence. A flanking TGT sequence contributes to the specificity of binding. Regulates a photoperiodic flowering response. Transcriptional repressor of 'CONSTANS' expression. The DNA-binding ability is not modulated by 'GIGANTEA' but the stability of CDF1 is controlled by the proteasome-dependent pathway. Ubiquitinated…
AAAGA	1420	+	1	CDF1 DOF5.5, At5g62430	Dof	A. thaliana	Circadian-regulation at the protein level, but not at the mRNA level. Strongly decreased expression during the dark phase. Accumulates at high levels at the beginning of the day. PMID:16002617	Transcription factor that binds specifically to a 5'-AA[AG]G-3' consensus core sequence. A flanking TGT sequence contributes to the specificity of binding. Regulates a photoperiodic flowering response. Transcriptional repressor of 'CONSTANS' expression. The DNA-binding ability is not modulated by 'GIGANTEA' but the stability of CDF1 is controlled by the proteasome-dependent pathway. Ubiquitinated…
GCCTT	79	-	1	DOF5.8 At5g66940	Dof	A. thaliana
CCTTT	80	-	1	DOF5.8 At5g66940	Dof	A. thaliana
AAAGT	109	+	1	DOF5.8 At5g66940	Dof	A. thaliana
ACCTT	158	-	1	DOF5.8 At5g66940	Dof	A. thaliana
ACCTT	184	-	1	DOF5.8 At5g66940	Dof	A. thaliana
TCTTT	252	-	1	DOF5.8 At5g66940	Dof	A. thaliana
TCCTT	275	-	1	DOF5.8 At5g66940	Dof	A. thaliana
TCTTT	328	-	1	DOF5.8 At5g66940	Dof	A. thaliana
TCCTT	338	-	1	DOF5.8 At5g66940	Dof	A. thaliana
GCTTT	369	-	1	DOF5.8 At5g66940	Dof	A. thaliana
ACTTT	382	-	1	DOF5.8 At5g66940	Dof	A. thaliana
AAAGC	400	+	1	DOF5.8 At5g66940	Dof	A. thaliana
ACTTT	509	-	1	DOF5.8 At5g66940	Dof	A. thaliana
AAAGC	571	+	1	DOF5.8 At5g66940	Dof	A. thaliana
TCTTT	586	-	1	DOF5.8 At5g66940	Dof	A. thaliana
ACCTT	605	-	1	DOF5.8 At5g66940	Dof	A. thaliana
ACTTT	612	-	1	DOF5.8 At5g66940	Dof	A. thaliana
TCCTT	806	-	1	DOF5.8 At5g66940	Dof	A. thaliana
CCTTT	807	-	1	DOF5.8 At5g66940	Dof	A. thaliana
TCTTT	874	-	1	DOF5.8 At5g66940	Dof	A. thaliana
ACTTT	881	-	1	DOF5.8 At5g66940	Dof	A. thaliana
AAAGA	939	+	1	DOF5.8 At5g66940	Dof	A. thaliana
AAAGT	982	+	1	DOF5.8 At5g66940	Dof	A. thaliana
ACTTT	1021	-	1	DOF5.8 At5g66940	Dof	A. thaliana
AAAGG	1030	+	1	DOF5.8 At5g66940	Dof	A. thaliana
AAGGG	1031	+	1	DOF5.8 At5g66940	Dof	A. thaliana
TCCTT	1156	-	1	DOF5.8 At5g66940	Dof	A. thaliana
AAAGG	1289	+	1	DOF5.8 At5g66940	Dof	A. thaliana
AAGGC	1290	+	1	DOF5.8 At5g66940	Dof	A. thaliana
ACTTT	1297	-	1	DOF5.8 At5g66940	Dof	A. thaliana
AAAGG	1371	+	1	DOF5.8 At5g66940	Dof	A. thaliana
AAGGA	1372	+	1	DOF5.8 At5g66940	Dof	A. thaliana
AAAGA	1413	+	1	DOF5.8 At5g66940	Dof	A. thaliana
AAAGA	1420	+	1	DOF5.8 At5g66940	Dof	A. thaliana
ATAAT	1044	-	0.91	ATHB-15 CNA, ICU4, At1g52150	Homeodomain; bZIP; HD-ZIP	A. thaliana	Induction by auxin. Repressed by miR165 and miR166. PMID:16033795, PMID:15773855, PMID:16617092, PMID:17237362.	Probable transcription factor involved in the regulation of meristem development to promote lateral organ formation. May regulates procambial and vascular tissue formation or maintenance, and vascular development in inflorescence stems. PMID:15705957, PMID:15598805, PMID:16617092
ATAAT	307	-	0.93	HAT5 ATHB-1, At3g01470	Homeodomain; bZIP; HD-ZIP	A. thaliana	response to blue light, response to salt stress 16055682	involved in leaf development PMID:8535134
ATAAT	310	+	0.99	HAT5 ATHB-1, At3g01470	Homeodomain; bZIP; HD-ZIP	A. thaliana	response to blue light, response to salt stress 16055682	Probable transcription activator involved in leaf development PMID:8535134
AATAA	308	+	0.91	HAT5 ATHB-1, At3g01470	Homeodomain; bZIP; HD-ZIP	A. thaliana	response to blue light, response to salt stress 16055682	Probable transcription activator involved in leaf development PMID:8535134
AATAA	307	+	0.89	HAT5 ATHB-1, At3g01470	Homeodomain; bZIP; HD-ZIP	A. thaliana	response to blue light, response to salt stress 16055682	Probable transcription activator involved in leaf development PMID:8535134
TAATT	1121	+	0.97	WOX13 At4g35550	Homeodomain ;bZIP ;HD-ZIP ;WOX	A. thaliana
TAATT	1266	+	0.97	WOX13 At4g35550	Homeodomain ;bZIP ;HD-ZIP ;WOX	A. thaliana
TAATT	1300	+	0.95	WOX13 At4g35550	Homeodomain ;bZIP ;HD-ZIP ;WOX	A. thaliana
AATTA	1121	-	0.97	WOX13 At4g35550	Homeodomain ;bZIP ;HD-ZIP ;WOX	A. thaliana
AATTA	1266	-	0.97	WOX13 At4g35550	Homeodomain ;bZIP ;HD-ZIP ;WOX	A. thaliana
ACACG	22	+	0.75	ABF4 AREB2, BZIP38, At3g1929	bZIP	A. thaliana	Up-regulated by drought, salt, abscisic acid (ABA) and cold. PMID:10636868 , PMID:11005831, PMID:16284313, PMID:16463099	Functions as transcriptional activator in the ABA-inducible expression of rd29B. Binds specifically to the ABA-responsive element (ABRE) of the rd29B gene promoter. PMID:11005831, PMID:11884679, PMID:15361142, PMID:16463099
ACACG	1140	+	0.75	ABF4 AREB2, BZIP38, At3g1929	bZIP	A. thaliana	Up-regulated by drought, salt, abscisic acid (ABA) and cold. PMID:10636868 , PMID:11005831, PMID:16284313, PMID:16463099	Functions as transcriptional activator in the ABA-inducible expression of rd29B. Binds specifically to the ABA-responsive element (ABRE) of the rd29B gene promoter. PMID:11005831, PMID:11884679, PMID:15361142, PMID:16463099
CTTGT	32	-	0.75	ABF4 AREB2, BZIP38, At3g1929	bZIP	A. thaliana	Up-regulated by drought, salt, abscisic acid (ABA) and cold. PMID:10636868 , PMID:11005831, PMID:16284313, PMID:16463099	Functions as transcriptional activator in the ABA-inducible expression of rd29B. Binds specifically to the ABA-responsive element (ABRE) of the rd29B gene promoter. PMID:11005831, PMID:11884679, PMID:15361142, PMID:16463099
ACCCG	227	+	0.75	ABF4 AREB2, BZIP38, At3g1929	bZIP	A. thaliana	Up-regulated by drought, salt, abscisic acid (ABA) and cold. PMID:10636868 , PMID:11005831, PMID:16284313, PMID:16463099	Functions as transcriptional activator in the ABA-inducible expression of rd29B. Binds specifically to the ABA-responsive element (ABRE) of the rd29B gene promoter. PMID:11005831, PMID:11884679, PMID:15361142, PMID:16463099
CGCGT	227	-	0.75	ABF4 AREB2, BZIP38, At3g1929	bZIP	A. thaliana	Up-regulated by drought, salt, abscisic acid (ABA) and cold. PMID:10636868 , PMID:11005831, PMID:16284313, PMID:16463099	Functions as transcriptional activator in the ABA-inducible expression of rd29B. Binds specifically to the ABA-responsive element (ABRE) of the rd29B gene promoter. PMID:11005831, PMID:11884679, PMID:15361142, PMID:16463099
CGTGT	498	-	0.75	ABF4 AREB2, BZIP38, At3g1929	bZIP	A. thaliana	Up-regulated by drought, salt, abscisic acid (ABA) and cold. PMID:10636868 , PMID:11005831, PMID:16284313, PMID:16463099	Functions as transcriptional activator in the ABA-inducible expression of rd29B. Binds specifically to the ABA-responsive element (ABRE) of the rd29B gene promoter. PMID:11005831, PMID:11884679, PMID:15361142, PMID:16463099
CGTGT	1000	-	0.75	ABF4 AREB2, BZIP38, At3g1929	bZIP	A. thaliana	Up-regulated by drought, salt, abscisic acid (ABA) and cold. PMID:10636868 , PMID:11005831, PMID:16284313, PMID:16463099	Functions as transcriptional activator in the ABA-inducible expression of rd29B. Binds specifically to the ABA-responsive element (ABRE) of the rd29B gene promoter. PMID:11005831, PMID:11884679, PMID:15361142, PMID:16463099
ACACG	22	+	0.75	ABF3 BZIP37, DPBF5, At4g34000/At4g34010	bZIP	A. thaliana	Up-regulated by drought, salt, abscisic acid (ABA). PMID:10636868, PMID:16284313	Binds to the ABA-responsive element (ABRE). Mediates stress-responsive ABA signaling. PMID:11884679, PMID:15361142
ACACG	1140	+	0.75	ABF3 BZIP37, DPBF5, At4g34000/At4g34010	bZIP	A. thaliana	Up-regulated by drought, salt, abscisic acid (ABA). PMID:10636868, PMID:16284313	Binds to the ABA-responsive element (ABRE). Mediates stress-responsive ABA signaling. PMID:11884679, PMID:15361142
CTTGT	32	-	0.75	ABF3 BZIP37, DPBF5, At4g34000/At4g34010	bZIP	A. thaliana	Up-regulated by drought, salt, abscisic acid (ABA). PMID:10636868, PMID:16284313	Binds to the ABA-responsive element (ABRE). Mediates stress-responsive ABA signaling. PMID:11884679, PMID:15361142
ACCCG	227	+	0.75	ABF3 BZIP37, DPBF5, At4g34000/At4g34010	bZIP	A. thaliana	Up-regulated by drought, salt, abscisic acid (ABA). PMID:10636868, PMID:16284313	Binds to the ABA-responsive element (ABRE). Mediates stress-responsive ABA signaling. PMID:11884679, PMID:15361142
CGCGT	227	-	0.75	ABF3 BZIP37, DPBF5, At4g34000/At4g34010	bZIP	A. thaliana	Up-regulated by drought, salt, abscisic acid (ABA). PMID:10636868, PMID:16284313	Binds to the ABA-responsive element (ABRE). Mediates stress-responsive ABA signaling. PMID:11884679, PMID:15361142
CGTGT	498	-	0.75	ABF3 BZIP37, DPBF5, At4g34000/At4g34010	bZIP	A. thaliana	Up-regulated by drought, salt, abscisic acid (ABA). PMID:10636868, PMID:16284313	Binds to the ABA-responsive element (ABRE). Mediates stress-responsive ABA signaling. PMID:11884679, PMID:15361142
CGTGT	1000	-	0.75	ABF3 BZIP37, DPBF5, At4g34000/At4g34010	bZIP	A. thaliana	Up-regulated by drought, salt, abscisic acid (ABA). PMID:10636868, PMID:16284313	Binds to the ABA-responsive element (ABRE). Mediates stress-responsive ABA signaling. PMID:11884679, PMID:15361142
CGTCA	229	+	0.97	TGA9 BZIP21, At1g08320	bZIP	A. thaliana	Induced by flg22 in leaves. PMID:27717447	Together with TGA10, basic leucine-zipper transcription factor required for anther development, probably via the activation of SPL expression in anthers and via the regulation of genes with functions in early and middle tapetal development (PubMed:20805327). Required for signaling responses to pathogen-associated molecular patterns (PAMPs) such as flg22 that involves chloroplastic reactive oxygen…
CGTCA	1208	-	0.97	TGA9 BZIP21, At1g08320	bZIP	A. thaliana	Induced by flg22 in leaves. PMID:27717447	Together with TGA10, basic leucine-zipper transcription factor required for anther development, probably via the activation of SPL expression in anthers and via the regulation of genes with functions in early and middle tapetal development (PubMed:20805327). Required for signaling responses to pathogen-associated molecular patterns (PAMPs) such as flg22 that involves chloroplastic reactive oxygen…
TGACG	1208	-	0.93	TGA9 BZIP21, At1g08320	bZIP	A. thaliana	Induced by flg22 in leaves. PMID:27717447	Together with TGA10, basic leucine-zipper transcription factor required for anther development, probably via the activation of SPL expression in anthers and via the regulation of genes with functions in early and middle tapetal development (PubMed:20805327). Required for signaling responses to pathogen-associated molecular patterns (PAMPs) such as flg22 that involves chloroplastic reactive oxygen…
CGTCA	229	+	0.97	PAN At1g68640	bZIP	A. thaliana		Transcriptional activator involved in the determination of floral organ number. Acts to determine floral organ patterning by establishing floral organ primordia in specific numbers and positions. Plays a role in regulating stem cell fate by directly controlling AG expression. Might represent a target for a post-translational modification by GRXC7/ROXY1. PMID:9990857, PMID:19395638, PMID:19395639
TGACG	1208	-	0.97	PAN At1g68640	bZIP	A. thaliana		Transcriptional activator involved in the determination of floral organ number. Acts to determine floral organ patterning by establishing floral organ primordia in specific numbers and positions. Plays a role in regulating stem cell fate by directly controlling AG expression. Might represent a target for a post-translational modification by GRXC7/ROXY1. PMID:9990857, PMID:19395638, PMID:19395639
TTCTT	426	-	1	PAN At1g68640	bZIP	A. thaliana		Transcriptional activator involved in the determination of floral organ number. Acts to determine floral organ patterning by establishing floral organ primordia in specific numbers and positions. Plays a role in regulating stem cell fate by directly controlling AG expression. Might represent a target for a post-translational modification by GRXC7/ROXY1. PMID:9990857, PMID:19395638, PMID:19395639
CGTCA	229	+	0.97	TGA10 BZIP65, At5g06839	bZIP	A. thaliana	Strongly induced by flg22 in leaves. PMID:27717447	Together with TGA9, basic leucine-zipper transcription factor required for anther development, probably via the activation of SPL expression in anthers and via the regulation of genes with functions in early and middle tapetal development (PubMed:20805327). Required for signaling responses to pathogen-associated molecular patterns (PAMPs) such as flg22 that involves chloroplastic reactive oxygen …
TGACG	1208	-	0.93	TGA10 BZIP65, At5g06839	bZIP	A. thaliana	Strongly induced by flg22 in leaves. PMID:27717447	Together with TGA9, basic leucine-zipper transcription factor required for anther development, probably via the activation of SPL expression in anthers and via the regulation of genes with functions in early and middle tapetal development (PubMed:20805327). Required for signaling responses to pathogen-associated molecular patterns (PAMPs) such as flg22 that involves chloroplastic reactive oxygen …
ATGAC	4	+	0.7	TGA2 BZIP20, HBP1B, At5g06950	bZIP	A. thaliana		Recognizes ocs elements like the as-1 motif of the cauliflower mosaic virus 35S promoter. Binding to the as-1-like cis elements mediate auxin- and salicylic acid-inducible transcription. Required to induce the systemic acquired resistance (SAR) via the regulation of pathogenesis-related genes expression. Binding to the as-1 element of PR-1 promoter is salicylic acid-inducible and mediated by NPR1…
ATGAC	795	+	0.7	TGA2 BZIP20, HBP1B, At5g06950	bZIP	A. thaliana		Recognizes ocs elements like the as-1 motif of the cauliflower mosaic virus 35S promoter. Binding to the as-1-like cis elements mediate auxin- and salicylic acid-inducible transcription. Required to induce the systemic acquired resistance (SAR) via the regulation of pathogenesis-related genes expression. Binding to the as-1 element of PR-1 promoter is salicylic acid-inducible and mediated by NPR1…
GTCAT	944	-	0.7	TGA2 BZIP20, HBP1B, At5g06950	bZIP	A. thaliana		Recognizes ocs elements like the as-1 motif of the cauliflower mosaic virus 35S promoter. Binding to the as-1-like cis elements mediate auxin- and salicylic acid-inducible transcription. Required to induce the systemic acquired resistance (SAR) via the regulation of pathogenesis-related genes expression. Binding to the as-1 element of PR-1 promoter is salicylic acid-inducible and mediated by NPR1…
TGACT	5	+	0.8	TGA2 BZIP20, HBP1B, At5g0695	bZIP	A. thaliana		Recognizes ocs elements like the as-1 motif of the cauliflower mosaic virus 35S promoter. Binding to the as-1-like cis elements mediate auxin- and salicylic acid-inducible transcription. Required to induce the systemic acquired resistance (SAR) via the regulation of pathogenesis-related genes expression. Binding to the as-1 element of PR-1 promoter is salicylic acid-inducible and mediated by NPR1…
TGACT	832	+	0.8	TGA2 BZIP20, HBP1B, At5g0695	bZIP	A. thaliana		Recognizes ocs elements like the as-1 motif of the cauliflower mosaic virus 35S promoter. Binding to the as-1-like cis elements mediate auxin- and salicylic acid-inducible transcription. Required to induce the systemic acquired resistance (SAR) via the regulation of pathogenesis-related genes expression. Binding to the as-1 element of PR-1 promoter is salicylic acid-inducible and mediated by NPR1…
AGTCA	111	-	0.8	TGA2 BZIP20, HBP1B, At5g0695	bZIP	A. thaliana		Recognizes ocs elements like the as-1 motif of the cauliflower mosaic virus 35S promoter. Binding to the as-1-like cis elements mediate auxin- and salicylic acid-inducible transcription. Required to induce the systemic acquired resistance (SAR) via the regulation of pathogenesis-related genes expression. Binding to the as-1 element of PR-1 promoter is salicylic acid-inducible and mediated by NPR1…
AGTCA	1240	-	0.8	TGA2 BZIP20, HBP1B, At5g0695	bZIP	A. thaliana		Recognizes ocs elements like the as-1 motif of the cauliflower mosaic virus 35S promoter. Binding to the as-1-like cis elements mediate auxin- and salicylic acid-inducible transcription. Required to induce the systemic acquired resistance (SAR) via the regulation of pathogenesis-related genes expression. Binding to the as-1 element of PR-1 promoter is salicylic acid-inducible and mediated by NPR1…
CGTCA	232	-	1	TGA2 BZIP20, HBP1B, At5g0695	bZIP	A. thaliana		Recognizes ocs elements like the as-1 motif of the cauliflower mosaic virus 35S promoter. Binding to the as-1-like cis elements mediate auxin- and salicylic acid-inducible transcription. Required to induce the systemic acquired resistance (SAR) via the regulation of pathogenesis-related genes expression. Binding to the as-1 element of PR-1 promoter is salicylic acid-inducible and mediated by NPR1…
CGTCA	229	+	0.93	TGA2 BZIP20, HBP1B, At5g0695	bZIP	A. thaliana		Recognizes ocs elements like the as-1 motif of the cauliflower mosaic virus 35S promoter. Binding to the as-1-like cis elements mediate auxin- and salicylic acid-inducible transcription. Required to induce the systemic acquired resistance (SAR) via the regulation of pathogenesis-related genes expression. Binding to the as-1 element of PR-1 promoter is salicylic acid-inducible and mediated by NPR1…
CTTCA	237	-	0.8	TGA2 BZIP20, HBP1B, At5g0695	bZIP	A. thaliana		Recognizes ocs elements like the as-1 motif of the cauliflower mosaic virus 35S promoter. Binding to the as-1-like cis elements mediate auxin- and salicylic acid-inducible transcription. Required to induce the systemic acquired resistance (SAR) via the regulation of pathogenesis-related genes expression. Binding to the as-1 element of PR-1 promoter is salicylic acid-inducible and mediated by NPR1…
CTTCA	607	-	0.8	TGA2 BZIP20, HBP1B, At5g0695	bZIP	A. thaliana		Recognizes ocs elements like the as-1 motif of the cauliflower mosaic virus 35S promoter. Binding to the as-1-like cis elements mediate auxin- and salicylic acid-inducible transcription. Required to induce the systemic acquired resistance (SAR) via the regulation of pathogenesis-related genes expression. Binding to the as-1 element of PR-1 promoter is salicylic acid-inducible and mediated by NPR1…
CTTCA	955	-	0.8	TGA2 BZIP20, HBP1B, At5g0695	bZIP	A. thaliana		Recognizes ocs elements like the as-1 motif of the cauliflower mosaic virus 35S promoter. Binding to the as-1-like cis elements mediate auxin- and salicylic acid-inducible transcription. Required to induce the systemic acquired resistance (SAR) via the regulation of pathogenesis-related genes expression. Binding to the as-1 element of PR-1 promoter is salicylic acid-inducible and mediated by NPR1…
CTTCA	1158	-	0.8	TGA2 BZIP20, HBP1B, At5g0695	bZIP	A. thaliana		Recognizes ocs elements like the as-1 motif of the cauliflower mosaic virus 35S promoter. Binding to the as-1-like cis elements mediate auxin- and salicylic acid-inducible transcription. Required to induce the systemic acquired resistance (SAR) via the regulation of pathogenesis-related genes expression. Binding to the as-1 element of PR-1 promoter is salicylic acid-inducible and mediated by NPR1…
CCTCA	1458	-	0.8	TGA2 BZIP20, HBP1B, At5g0695	bZIP	A. thaliana		Recognizes ocs elements like the as-1 motif of the cauliflower mosaic virus 35S promoter. Binding to the as-1-like cis elements mediate auxin- and salicylic acid-inducible transcription. Required to induce the systemic acquired resistance (SAR) via the regulation of pathogenesis-related genes expression. Binding to the as-1 element of PR-1 promoter is salicylic acid-inducible and mediated by NPR1…
CGTCT	250	-	0.8	TGA2 BZIP20, HBP1B, At5g0695	bZIP	A. thaliana		Recognizes ocs elements like the as-1 motif of the cauliflower mosaic virus 35S promoter. Binding to the as-1-like cis elements mediate auxin- and salicylic acid-inducible transcription. Required to induce the systemic acquired resistance (SAR) via the regulation of pathogenesis-related genes expression. Binding to the as-1 element of PR-1 promoter is salicylic acid-inducible and mediated by NPR1…
CGTCT	782	-	0.8	TGA2 BZIP20, HBP1B, At5g0695	bZIP	A. thaliana		Recognizes ocs elements like the as-1 motif of the cauliflower mosaic virus 35S promoter. Binding to the as-1-like cis elements mediate auxin- and salicylic acid-inducible transcription. Required to induce the systemic acquired resistance (SAR) via the regulation of pathogenesis-related genes expression. Binding to the as-1 element of PR-1 promoter is salicylic acid-inducible and mediated by NPR1…
CGTCC	362	-	0.8	TGA2 BZIP20, HBP1B, At5g0695	bZIP	A. thaliana		Recognizes ocs elements like the as-1 motif of the cauliflower mosaic virus 35S promoter. Binding to the as-1-like cis elements mediate auxin- and salicylic acid-inducible transcription. Required to induce the systemic acquired resistance (SAR) via the regulation of pathogenesis-related genes expression. Binding to the as-1 element of PR-1 promoter is salicylic acid-inducible and mediated by NPR1…
GGACG	407	+	0.8	TGA2 BZIP20, HBP1B, At5g0695	bZIP	A. thaliana		Recognizes ocs elements like the as-1 motif of the cauliflower mosaic virus 35S promoter. Binding to the as-1-like cis elements mediate auxin- and salicylic acid-inducible transcription. Required to induce the systemic acquired resistance (SAR) via the regulation of pathogenesis-related genes expression. Binding to the as-1 element of PR-1 promoter is salicylic acid-inducible and mediated by NPR1…
TGAAG	565	+	0.8	TGA2 BZIP20, HBP1B, At5g0695	bZIP	A. thaliana		Recognizes ocs elements like the as-1 motif of the cauliflower mosaic virus 35S promoter. Binding to the as-1-like cis elements mediate auxin- and salicylic acid-inducible transcription. Required to induce the systemic acquired resistance (SAR) via the regulation of pathogenesis-related genes expression. Binding to the as-1 element of PR-1 promoter is salicylic acid-inducible and mediated by NPR1…
TGAAG	789	+	0.8	TGA2 BZIP20, HBP1B, At5g0695	bZIP	A. thaliana		Recognizes ocs elements like the as-1 motif of the cauliflower mosaic virus 35S promoter. Binding to the as-1-like cis elements mediate auxin- and salicylic acid-inducible transcription. Required to induce the systemic acquired resistance (SAR) via the regulation of pathogenesis-related genes expression. Binding to the as-1 element of PR-1 promoter is salicylic acid-inducible and mediated by NPR1…
TGAAG	969	+	0.8	TGA2 BZIP20, HBP1B, At5g0695	bZIP	A. thaliana		Recognizes ocs elements like the as-1 motif of the cauliflower mosaic virus 35S promoter. Binding to the as-1-like cis elements mediate auxin- and salicylic acid-inducible transcription. Required to induce the systemic acquired resistance (SAR) via the regulation of pathogenesis-related genes expression. Binding to the as-1 element of PR-1 promoter is salicylic acid-inducible and mediated by NPR1…
TGTCA	601	-	0.8	TGA2 BZIP20, HBP1B, At5g0695	bZIP	A. thaliana		Recognizes ocs elements like the as-1 motif of the cauliflower mosaic virus 35S promoter. Binding to the as-1-like cis elements mediate auxin- and salicylic acid-inducible transcription. Required to induce the systemic acquired resistance (SAR) via the regulation of pathogenesis-related genes expression. Binding to the as-1 element of PR-1 promoter is salicylic acid-inducible and mediated by NPR1…
TGTCA	913	-	0.8	TGA2 BZIP20, HBP1B, At5g0695	bZIP	A. thaliana		Recognizes ocs elements like the as-1 motif of the cauliflower mosaic virus 35S promoter. Binding to the as-1-like cis elements mediate auxin- and salicylic acid-inducible transcription. Required to induce the systemic acquired resistance (SAR) via the regulation of pathogenesis-related genes expression. Binding to the as-1 element of PR-1 promoter is salicylic acid-inducible and mediated by NPR1…
TGTCA	948	-	0.8	TGA2 BZIP20, HBP1B, At5g0695	bZIP	A. thaliana		Recognizes ocs elements like the as-1 motif of the cauliflower mosaic virus 35S promoter. Binding to the as-1-like cis elements mediate auxin- and salicylic acid-inducible transcription. Required to induce the systemic acquired resistance (SAR) via the regulation of pathogenesis-related genes expression. Binding to the as-1 element of PR-1 promoter is salicylic acid-inducible and mediated by NPR1…
TGTCA	1147	-	0.8	TGA2 BZIP20, HBP1B, At5g0695	bZIP	A. thaliana		Recognizes ocs elements like the as-1 motif of the cauliflower mosaic virus 35S promoter. Binding to the as-1-like cis elements mediate auxin- and salicylic acid-inducible transcription. Required to induce the systemic acquired resistance (SAR) via the regulation of pathogenesis-related genes expression. Binding to the as-1 element of PR-1 promoter is salicylic acid-inducible and mediated by NPR1…
TGTCA	1251	-	0.8	TGA2 BZIP20, HBP1B, At5g0695	bZIP	A. thaliana		Recognizes ocs elements like the as-1 motif of the cauliflower mosaic virus 35S promoter. Binding to the as-1-like cis elements mediate auxin- and salicylic acid-inducible transcription. Required to induce the systemic acquired resistance (SAR) via the regulation of pathogenesis-related genes expression. Binding to the as-1 element of PR-1 promoter is salicylic acid-inducible and mediated by NPR1…
CGTTA	687	-	0.8	TGA2 BZIP20, HBP1B, At5g0695	bZIP	A. thaliana		Recognizes ocs elements like the as-1 motif of the cauliflower mosaic virus 35S promoter. Binding to the as-1-like cis elements mediate auxin- and salicylic acid-inducible transcription. Required to induce the systemic acquired resistance (SAR) via the regulation of pathogenesis-related genes expression. Binding to the as-1 element of PR-1 promoter is salicylic acid-inducible and mediated by NPR1…
CGTAA	722	-	0.8	TGA2 BZIP20, HBP1B, At5g0695	bZIP	A. thaliana		Recognizes ocs elements like the as-1 motif of the cauliflower mosaic virus 35S promoter. Binding to the as-1-like cis elements mediate auxin- and salicylic acid-inducible transcription. Required to induce the systemic acquired resistance (SAR) via the regulation of pathogenesis-related genes expression. Binding to the as-1 element of PR-1 promoter is salicylic acid-inducible and mediated by NPR1…
TGACA	796	+	0.8	TGA2 BZIP20, HBP1B, At5g0695	bZIP	A. thaliana		Recognizes ocs elements like the as-1 motif of the cauliflower mosaic virus 35S promoter. Binding to the as-1-like cis elements mediate auxin- and salicylic acid-inducible transcription. Required to induce the systemic acquired resistance (SAR) via the regulation of pathogenesis-related genes expression. Binding to the as-1 element of PR-1 promoter is salicylic acid-inducible and mediated by NPR1…
TCACG	1112	+	0.8	TGA2 BZIP20, HBP1B, At5g0695	bZIP	A. thaliana		Recognizes ocs elements like the as-1 motif of the cauliflower mosaic virus 35S promoter. Binding to the as-1-like cis elements mediate auxin- and salicylic acid-inducible transcription. Required to induce the systemic acquired resistance (SAR) via the regulation of pathogenesis-related genes expression. Binding to the as-1 element of PR-1 promoter is salicylic acid-inducible and mediated by NPR1…
TGACG	1210	+	1	TGA2 BZIP20, HBP1B, At5g0695	bZIP	A. thaliana		Recognizes ocs elements like the as-1 motif of the cauliflower mosaic virus 35S promoter. Binding to the as-1-like cis elements mediate auxin- and salicylic acid-inducible transcription. Required to induce the systemic acquired resistance (SAR) via the regulation of pathogenesis-related genes expression. Binding to the as-1 element of PR-1 promoter is salicylic acid-inducible and mediated by NPR1…
TGACG	1208	-	0.93	TGA2 BZIP20, HBP1B, At5g0695	bZIP	A. thaliana		Recognizes ocs elements like the as-1 motif of the cauliflower mosaic virus 35S promoter. Binding to the as-1-like cis elements mediate auxin- and salicylic acid-inducible transcription. Required to induce the systemic acquired resistance (SAR) via the regulation of pathogenesis-related genes expression. Binding to the as-1 element of PR-1 promoter is salicylic acid-inducible and mediated by NPR1…
CGTCA	229	+	0.97	TGA1 BZIP47, At5g65210	bZIP	A. thaliana		Transcriptional activator that binds specifically to the DNA sequence 5'-TGACG-3'. Recognizes ocs elements like the as-1 motif of the cauliflower mosaic virus 35S promoter. Binding to the as-1-like cis elements mediate auxin- and salicylic acid-inducible transcription. May be involved in the induction of the systemic acquired resistance (SAR) via its interaction with NPR1. Could also bind to the …
TGACT	5	+	0.8	TGA1 BZIP47, At5g65210	bZIP	A. thaliana		Transcriptional activator that binds specifically to the DNA sequence 5'-TGACG-3'. Recognizes ocs elements like the as-1 motif of the cauliflower mosaic virus 35S promoter. Binding to the as-1-like cis elements mediate auxin- and salicylic acid-inducible transcription. May be involved in the induction of the systemic acquired resistance (SAR) via its interaction with NPR1. Could also bind to the …
TGACT	832	+	0.8	TGA1 BZIP47, At5g65210	bZIP	A. thaliana		Transcriptional activator that binds specifically to the DNA sequence 5'-TGACG-3'. Recognizes ocs elements like the as-1 motif of the cauliflower mosaic virus 35S promoter. Binding to the as-1-like cis elements mediate auxin- and salicylic acid-inducible transcription. May be involved in the induction of the systemic acquired resistance (SAR) via its interaction with NPR1. Could also bind to the …
AGTCA	111	-	0.8	TGA1 BZIP47, At5g65210	bZIP	A. thaliana		Transcriptional activator that binds specifically to the DNA sequence 5'-TGACG-3'. Recognizes ocs elements like the as-1 motif of the cauliflower mosaic virus 35S promoter. Binding to the as-1-like cis elements mediate auxin- and salicylic acid-inducible transcription. May be involved in the induction of the systemic acquired resistance (SAR) via its interaction with NPR1. Could also bind to the …
AGTCA	1240	-	0.8	TGA1 BZIP47, At5g65210	bZIP	A. thaliana		Transcriptional activator that binds specifically to the DNA sequence 5'-TGACG-3'. Recognizes ocs elements like the as-1 motif of the cauliflower mosaic virus 35S promoter. Binding to the as-1-like cis elements mediate auxin- and salicylic acid-inducible transcription. May be involved in the induction of the systemic acquired resistance (SAR) via its interaction with NPR1. Could also bind to the …
CGTCA	232	-	1	TGA1 BZIP47, At5g65210	bZIP	A. thaliana		Transcriptional activator that binds specifically to the DNA sequence 5'-TGACG-3'. Recognizes ocs elements like the as-1 motif of the cauliflower mosaic virus 35S promoter. Binding to the as-1-like cis elements mediate auxin- and salicylic acid-inducible transcription. May be involved in the induction of the systemic acquired resistance (SAR) via its interaction with NPR1. Could also bind to the …
CTTCA	237	-	0.8	TGA1 BZIP47, At5g65210	bZIP	A. thaliana		Transcriptional activator that binds specifically to the DNA sequence 5'-TGACG-3'. Recognizes ocs elements like the as-1 motif of the cauliflower mosaic virus 35S promoter. Binding to the as-1-like cis elements mediate auxin- and salicylic acid-inducible transcription. May be involved in the induction of the systemic acquired resistance (SAR) via its interaction with NPR1. Could also bind to the …
CTTCA	607	-	0.8	TGA1 BZIP47, At5g65210	bZIP	A. thaliana		Transcriptional activator that binds specifically to the DNA sequence 5'-TGACG-3'. Recognizes ocs elements like the as-1 motif of the cauliflower mosaic virus 35S promoter. Binding to the as-1-like cis elements mediate auxin- and salicylic acid-inducible transcription. May be involved in the induction of the systemic acquired resistance (SAR) via its interaction with NPR1. Could also bind to the …
CTTCA	955	-	0.8	TGA1 BZIP47, At5g65210	bZIP	A. thaliana		Transcriptional activator that binds specifically to the DNA sequence 5'-TGACG-3'. Recognizes ocs elements like the as-1 motif of the cauliflower mosaic virus 35S promoter. Binding to the as-1-like cis elements mediate auxin- and salicylic acid-inducible transcription. May be involved in the induction of the systemic acquired resistance (SAR) via its interaction with NPR1. Could also bind to the …
CTTCA	1158	-	0.8	TGA1 BZIP47, At5g65210	bZIP	A. thaliana		Transcriptional activator that binds specifically to the DNA sequence 5'-TGACG-3'. Recognizes ocs elements like the as-1 motif of the cauliflower mosaic virus 35S promoter. Binding to the as-1-like cis elements mediate auxin- and salicylic acid-inducible transcription. May be involved in the induction of the systemic acquired resistance (SAR) via its interaction with NPR1. Could also bind to the …
CCTCA	1458	-	0.8	TGA1 BZIP47, At5g65210	bZIP	A. thaliana		Transcriptional activator that binds specifically to the DNA sequence 5'-TGACG-3'. Recognizes ocs elements like the as-1 motif of the cauliflower mosaic virus 35S promoter. Binding to the as-1-like cis elements mediate auxin- and salicylic acid-inducible transcription. May be involved in the induction of the systemic acquired resistance (SAR) via its interaction with NPR1. Could also bind to the …
CGTCT	250	-	0.8	TGA1 BZIP47, At5g65210	bZIP	A. thaliana		Transcriptional activator that binds specifically to the DNA sequence 5'-TGACG-3'. Recognizes ocs elements like the as-1 motif of the cauliflower mosaic virus 35S promoter. Binding to the as-1-like cis elements mediate auxin- and salicylic acid-inducible transcription. May be involved in the induction of the systemic acquired resistance (SAR) via its interaction with NPR1. Could also bind to the …
CGTCT	782	-	0.8	TGA1 BZIP47, At5g65210	bZIP	A. thaliana		Transcriptional activator that binds specifically to the DNA sequence 5'-TGACG-3'. Recognizes ocs elements like the as-1 motif of the cauliflower mosaic virus 35S promoter. Binding to the as-1-like cis elements mediate auxin- and salicylic acid-inducible transcription. May be involved in the induction of the systemic acquired resistance (SAR) via its interaction with NPR1. Could also bind to the …
CGTCC	362	-	0.8	TGA1 BZIP47, At5g65210	bZIP	A. thaliana		Transcriptional activator that binds specifically to the DNA sequence 5'-TGACG-3'. Recognizes ocs elements like the as-1 motif of the cauliflower mosaic virus 35S promoter. Binding to the as-1-like cis elements mediate auxin- and salicylic acid-inducible transcription. May be involved in the induction of the systemic acquired resistance (SAR) via its interaction with NPR1. Could also bind to the …
GGACG	407	+	0.8	TGA1 BZIP47, At5g65210	bZIP	A. thaliana		Transcriptional activator that binds specifically to the DNA sequence 5'-TGACG-3'. Recognizes ocs elements like the as-1 motif of the cauliflower mosaic virus 35S promoter. Binding to the as-1-like cis elements mediate auxin- and salicylic acid-inducible transcription. May be involved in the induction of the systemic acquired resistance (SAR) via its interaction with NPR1. Could also bind to the …
TGAAG	565	+	0.8	TGA1 BZIP47, At5g65210	bZIP	A. thaliana		Transcriptional activator that binds specifically to the DNA sequence 5'-TGACG-3'. Recognizes ocs elements like the as-1 motif of the cauliflower mosaic virus 35S promoter. Binding to the as-1-like cis elements mediate auxin- and salicylic acid-inducible transcription. May be involved in the induction of the systemic acquired resistance (SAR) via its interaction with NPR1. Could also bind to the …
TGAAG	789	+	0.8	TGA1 BZIP47, At5g65210	bZIP	A. thaliana		Transcriptional activator that binds specifically to the DNA sequence 5'-TGACG-3'. Recognizes ocs elements like the as-1 motif of the cauliflower mosaic virus 35S promoter. Binding to the as-1-like cis elements mediate auxin- and salicylic acid-inducible transcription. May be involved in the induction of the systemic acquired resistance (SAR) via its interaction with NPR1. Could also bind to the …
TGAAG	969	+	0.8	TGA1 BZIP47, At5g65210	bZIP	A. thaliana		Transcriptional activator that binds specifically to the DNA sequence 5'-TGACG-3'. Recognizes ocs elements like the as-1 motif of the cauliflower mosaic virus 35S promoter. Binding to the as-1-like cis elements mediate auxin- and salicylic acid-inducible transcription. May be involved in the induction of the systemic acquired resistance (SAR) via its interaction with NPR1. Could also bind to the …
TGTCA	601	-	0.8	TGA1 BZIP47, At5g65210	bZIP	A. thaliana		Transcriptional activator that binds specifically to the DNA sequence 5'-TGACG-3'. Recognizes ocs elements like the as-1 motif of the cauliflower mosaic virus 35S promoter. Binding to the as-1-like cis elements mediate auxin- and salicylic acid-inducible transcription. May be involved in the induction of the systemic acquired resistance (SAR) via its interaction with NPR1. Could also bind to the …
TGTCA	913	-	0.8	TGA1 BZIP47, At5g65210	bZIP	A. thaliana		Transcriptional activator that binds specifically to the DNA sequence 5'-TGACG-3'. Recognizes ocs elements like the as-1 motif of the cauliflower mosaic virus 35S promoter. Binding to the as-1-like cis elements mediate auxin- and salicylic acid-inducible transcription. May be involved in the induction of the systemic acquired resistance (SAR) via its interaction with NPR1. Could also bind to the …
TGTCA	948	-	0.8	TGA1 BZIP47, At5g65210	bZIP	A. thaliana		Transcriptional activator that binds specifically to the DNA sequence 5'-TGACG-3'. Recognizes ocs elements like the as-1 motif of the cauliflower mosaic virus 35S promoter. Binding to the as-1-like cis elements mediate auxin- and salicylic acid-inducible transcription. May be involved in the induction of the systemic acquired resistance (SAR) via its interaction with NPR1. Could also bind to the …
TGTCA	1147	-	0.8	TGA1 BZIP47, At5g65210	bZIP	A. thaliana		Transcriptional activator that binds specifically to the DNA sequence 5'-TGACG-3'. Recognizes ocs elements like the as-1 motif of the cauliflower mosaic virus 35S promoter. Binding to the as-1-like cis elements mediate auxin- and salicylic acid-inducible transcription. May be involved in the induction of the systemic acquired resistance (SAR) via its interaction with NPR1. Could also bind to the …
TGTCA	1251	-	0.8	TGA1 BZIP47, At5g65210	bZIP	A. thaliana		Transcriptional activator that binds specifically to the DNA sequence 5'-TGACG-3'. Recognizes ocs elements like the as-1 motif of the cauliflower mosaic virus 35S promoter. Binding to the as-1-like cis elements mediate auxin- and salicylic acid-inducible transcription. May be involved in the induction of the systemic acquired resistance (SAR) via its interaction with NPR1. Could also bind to the …
CGTTA	687	-	0.8	TGA1 BZIP47, At5g65210	bZIP	A. thaliana		Transcriptional activator that binds specifically to the DNA sequence 5'-TGACG-3'. Recognizes ocs elements like the as-1 motif of the cauliflower mosaic virus 35S promoter. Binding to the as-1-like cis elements mediate auxin- and salicylic acid-inducible transcription. May be involved in the induction of the systemic acquired resistance (SAR) via its interaction with NPR1. Could also bind to the …
CGTAA	722	-	0.8	TGA1 BZIP47, At5g65210	bZIP	A. thaliana		Transcriptional activator that binds specifically to the DNA sequence 5'-TGACG-3'. Recognizes ocs elements like the as-1 motif of the cauliflower mosaic virus 35S promoter. Binding to the as-1-like cis elements mediate auxin- and salicylic acid-inducible transcription. May be involved in the induction of the systemic acquired resistance (SAR) via its interaction with NPR1. Could also bind to the …
TGACA	796	+	0.8	TGA1 BZIP47, At5g65210	bZIP	A. thaliana		Transcriptional activator that binds specifically to the DNA sequence 5'-TGACG-3'. Recognizes ocs elements like the as-1 motif of the cauliflower mosaic virus 35S promoter. Binding to the as-1-like cis elements mediate auxin- and salicylic acid-inducible transcription. May be involved in the induction of the systemic acquired resistance (SAR) via its interaction with NPR1. Could also bind to the …
TCACG	1112	+	0.8	TGA1 BZIP47, At5g65210	bZIP	A. thaliana		Transcriptional activator that binds specifically to the DNA sequence 5'-TGACG-3'. Recognizes ocs elements like the as-1 motif of the cauliflower mosaic virus 35S promoter. Binding to the as-1-like cis elements mediate auxin- and salicylic acid-inducible transcription. May be involved in the induction of the systemic acquired resistance (SAR) via its interaction with NPR1. Could also bind to the …
TGACG	1210	+	1	TGA1 BZIP47, At5g65210	bZIP	A. thaliana		Transcriptional activator that binds specifically to the DNA sequence 5'-TGACG-3'. Recognizes ocs elements like the as-1 motif of the cauliflower mosaic virus 35S promoter. Binding to the as-1-like cis elements mediate auxin- and salicylic acid-inducible transcription. May be involved in the induction of the systemic acquired resistance (SAR) via its interaction with NPR1. Could also bind to the …
TGACG	1208	-	0.97	TGA1 BZIP47, At5g65210	bZIP	A. thaliana		Transcriptional activator that binds specifically to the DNA sequence 5'-TGACG-3'. Recognizes ocs elements like the as-1 motif of the cauliflower mosaic virus 35S promoter. Binding to the as-1-like cis elements mediate auxin- and salicylic acid-inducible transcription. May be involved in the induction of the systemic acquired resistance (SAR) via its interaction with NPR1. Could also bind to the …
CCACG	822	+	0.7	BZIP25 BZO2H4, At3g54620	bZIP	A. thaliana		Transcription factor that binds to the 5'-ACGT-3' box, especially present in G-box-like motif (5'-CCACGTGGCC-3'), ABRE elements, of seed storage protein (SSP) encoding gene promoters (e.g. At2S and CRU3) and promotes their expression in seeds when in complex with ABI3 and BZIP53. PMID:12657652, PMID:19531597, PMID:19261733
TACGT	46	-	1	BZIP25 BZO2H4, At3g54620	bZIP	A. thaliana		Transcription factor that binds to the 5'-ACGT-3' box, especially present in G-box-like motif (5'-CCACGTGGCC-3'), ABRE elements, of seed storage protein (SSP) encoding gene promoters (e.g. At2S and CRU3) and promotes their expression in seeds when in complex with ABI3 and BZIP53. PMID:12657652, PMID:19531597, PMID:19261733
TACGT	720	-	1	BZIP25 BZO2H4, At3g54620	bZIP	A. thaliana		Transcription factor that binds to the 5'-ACGT-3' box, especially present in G-box-like motif (5'-CCACGTGGCC-3'), ABRE elements, of seed storage protein (SSP) encoding gene promoters (e.g. At2S and CRU3) and promotes their expression in seeds when in complex with ABI3 and BZIP53. PMID:12657652, PMID:19531597, PMID:19261733
ACGTA	47	+	1	BZIP25 BZO2H4, At3g54620	bZIP	A. thaliana		Transcription factor that binds to the 5'-ACGT-3' box, especially present in G-box-like motif (5'-CCACGTGGCC-3'), ABRE elements, of seed storage protein (SSP) encoding gene promoters (e.g. At2S and CRU3) and promotes their expression in seeds when in complex with ABI3 and BZIP53. PMID:12657652, PMID:19531597, PMID:19261733
ACGTA	721	+	1	BZIP25 BZO2H4, At3g54620	bZIP	A. thaliana		Transcription factor that binds to the 5'-ACGT-3' box, especially present in G-box-like motif (5'-CCACGTGGCC-3'), ABRE elements, of seed storage protein (SSP) encoding gene promoters (e.g. At2S and CRU3) and promotes their expression in seeds when in complex with ABI3 and BZIP53. PMID:12657652, PMID:19531597, PMID:19261733
AACGT	290	-	1	BZIP25 BZO2H4, At3g54620	bZIP	A. thaliana		Transcription factor that binds to the 5'-ACGT-3' box, especially present in G-box-like motif (5'-CCACGTGGCC-3'), ABRE elements, of seed storage protein (SSP) encoding gene promoters (e.g. At2S and CRU3) and promotes their expression in seeds when in complex with ABI3 and BZIP53. PMID:12657652, PMID:19531597, PMID:19261733
AACGT	1188	-	1	BZIP25 BZO2H4, At3g54620	bZIP	A. thaliana		Transcription factor that binds to the 5'-ACGT-3' box, especially present in G-box-like motif (5'-CCACGTGGCC-3'), ABRE elements, of seed storage protein (SSP) encoding gene promoters (e.g. At2S and CRU3) and promotes their expression in seeds when in complex with ABI3 and BZIP53. PMID:12657652, PMID:19531597, PMID:19261733
ACGTT	291	+	1	BZIP25 BZO2H4, At3g54620	bZIP	A. thaliana		Transcription factor that binds to the 5'-ACGT-3' box, especially present in G-box-like motif (5'-CCACGTGGCC-3'), ABRE elements, of seed storage protein (SSP) encoding gene promoters (e.g. At2S and CRU3) and promotes their expression in seeds when in complex with ABI3 and BZIP53. PMID:12657652, PMID:19531597, PMID:19261733
ACGTT	1189	+	1	BZIP25 BZO2H4, At3g54620	bZIP	A. thaliana		Transcription factor that binds to the 5'-ACGT-3' box, especially present in G-box-like motif (5'-CCACGTGGCC-3'), ABRE elements, of seed storage protein (SSP) encoding gene promoters (e.g. At2S and CRU3) and promotes their expression in seeds when in complex with ABI3 and BZIP53. PMID:12657652, PMID:19531597, PMID:19261733
CCACG	822	+	0.7	BZIP10 BZO2H1, At4g02640	bZIP	A. thaliana		Transcription factor that binds to the C-box-like motif (5'-TGCTGACGTCA-3') and G-box-like motif (5'-CCACGTGGCC-3'), ABRE elements, of gene promoters. Binds to the 5'-ACGT-3' motif of seed storage protein (SSP) encoding gene promoters (e.g. At2S and CRU3) and promotes their expression in seeds when in complex with ABI3 and BZIP53. Involved in the defense responses to the biotrophic pathogen Hyalo…
CAGCA	1427	-	0.73	BZIP10 BZO2H1, At4g02640	bZIP	A. thaliana		Transcription factor that binds to the C-box-like motif (5'-TGCTGACGTCA-3') and G-box-like motif (5'-CCACGTGGCC-3'), ABRE elements, of gene promoters. Binds to the 5'-ACGT-3' motif of seed storage protein (SSP) encoding gene promoters (e.g. At2S and CRU3) and promotes their expression in seeds when in complex with ABI3 and BZIP53. Involved in the defense responses to the biotrophic pathogen Hyalo…
TACGT	46	-	1	BZIP10 BZO2H1, At4g02640	bZIP	A. thaliana		Transcription factor that binds to the C-box-like motif (5'-TGCTGACGTCA-3') and G-box-like motif (5'-CCACGTGGCC-3'), ABRE elements, of gene promoters. Binds to the 5'-ACGT-3' motif of seed storage protein (SSP) encoding gene promoters (e.g. At2S and CRU3) and promotes their expression in seeds when in complex with ABI3 and BZIP53. Involved in the defense responses to the biotrophic pathogen Hyalo…
TACGT	720	-	1	BZIP10 BZO2H1, At4g02640	bZIP	A. thaliana		Transcription factor that binds to the C-box-like motif (5'-TGCTGACGTCA-3') and G-box-like motif (5'-CCACGTGGCC-3'), ABRE elements, of gene promoters. Binds to the 5'-ACGT-3' motif of seed storage protein (SSP) encoding gene promoters (e.g. At2S and CRU3) and promotes their expression in seeds when in complex with ABI3 and BZIP53. Involved in the defense responses to the biotrophic pathogen Hyalo…
ACGTA	47	+	1	BZIP10 BZO2H1, At4g02640	bZIP	A. thaliana		Transcription factor that binds to the C-box-like motif (5'-TGCTGACGTCA-3') and G-box-like motif (5'-CCACGTGGCC-3'), ABRE elements, of gene promoters. Binds to the 5'-ACGT-3' motif of seed storage protein (SSP) encoding gene promoters (e.g. At2S and CRU3) and promotes their expression in seeds when in complex with ABI3 and BZIP53. Involved in the defense responses to the biotrophic pathogen Hyalo…
ACGTA	721	+	1	BZIP10 BZO2H1, At4g02640	bZIP	A. thaliana		Transcription factor that binds to the C-box-like motif (5'-TGCTGACGTCA-3') and G-box-like motif (5'-CCACGTGGCC-3'), ABRE elements, of gene promoters. Binds to the 5'-ACGT-3' motif of seed storage protein (SSP) encoding gene promoters (e.g. At2S and CRU3) and promotes their expression in seeds when in complex with ABI3 and BZIP53. Involved in the defense responses to the biotrophic pathogen Hyalo…
AACGT	290	-	1	BZIP10 BZO2H1, At4g02640	bZIP	A. thaliana		Transcription factor that binds to the C-box-like motif (5'-TGCTGACGTCA-3') and G-box-like motif (5'-CCACGTGGCC-3'), ABRE elements, of gene promoters. Binds to the 5'-ACGT-3' motif of seed storage protein (SSP) encoding gene promoters (e.g. At2S and CRU3) and promotes their expression in seeds when in complex with ABI3 and BZIP53. Involved in the defense responses to the biotrophic pathogen Hyalo…
AACGT	1188	-	1	BZIP10 BZO2H1, At4g02640	bZIP	A. thaliana		Transcription factor that binds to the C-box-like motif (5'-TGCTGACGTCA-3') and G-box-like motif (5'-CCACGTGGCC-3'), ABRE elements, of gene promoters. Binds to the 5'-ACGT-3' motif of seed storage protein (SSP) encoding gene promoters (e.g. At2S and CRU3) and promotes their expression in seeds when in complex with ABI3 and BZIP53. Involved in the defense responses to the biotrophic pathogen Hyalo…
ACGTT	291	+	1	BZIP10 BZO2H1, At4g02640	bZIP	A. thaliana		Transcription factor that binds to the C-box-like motif (5'-TGCTGACGTCA-3') and G-box-like motif (5'-CCACGTGGCC-3'), ABRE elements, of gene promoters. Binds to the 5'-ACGT-3' motif of seed storage protein (SSP) encoding gene promoters (e.g. At2S and CRU3) and promotes their expression in seeds when in complex with ABI3 and BZIP53. Involved in the defense responses to the biotrophic pathogen Hyalo…
ACGTT	1189	+	1	BZIP10 BZO2H1, At4g02640	bZIP	A. thaliana		Transcription factor that binds to the C-box-like motif (5'-TGCTGACGTCA-3') and G-box-like motif (5'-CCACGTGGCC-3'), ABRE elements, of gene promoters. Binds to the 5'-ACGT-3' motif of seed storage protein (SSP) encoding gene promoters (e.g. At2S and CRU3) and promotes their expression in seeds when in complex with ABI3 and BZIP53. Involved in the defense responses to the biotrophic pathogen Hyalo…
TACAC	29	+	0.82	TGA5 BZIP26, OBF5, At5g06960	bZIP	A. thaliana		Transcriptional activator that binds specifically to the DNA sequence 5'-TGACG-3'. Recognizes ocs elements like the as-1 motif of the cauliflower mosaic virus 35S promoter. Binding to the as-1-like cis elements mediate auxin- and salicylic acid-inducible transcription. May be involved in the induction of the systemic acquired resistance (SAR) via its interaction with NPR1. Could also bind to the …
TGACT	5	+	0.8	TGA5 BZIP26, OBF5, At5g06960	bZIP	A. thaliana		Transcriptional activator that binds specifically to the DNA sequence 5'-TGACG-3'. Recognizes ocs elements like the as-1 motif of the cauliflower mosaic virus 35S promoter. Binding to the as-1-like cis elements mediate auxin- and salicylic acid-inducible transcription. May be involved in the induction of the systemic acquired resistance (SAR) via its interaction with NPR1. Could also bind to the …
TGACT	832	+	0.8	TGA5 BZIP26, OBF5, At5g06960	bZIP	A. thaliana		Transcriptional activator that binds specifically to the DNA sequence 5'-TGACG-3'. Recognizes ocs elements like the as-1 motif of the cauliflower mosaic virus 35S promoter. Binding to the as-1-like cis elements mediate auxin- and salicylic acid-inducible transcription. May be involved in the induction of the systemic acquired resistance (SAR) via its interaction with NPR1. Could also bind to the …
AGTCA	111	-	0.8	TGA5 BZIP26, OBF5, At5g06960	bZIP	A. thaliana		Transcriptional activator that binds specifically to the DNA sequence 5'-TGACG-3'. Recognizes ocs elements like the as-1 motif of the cauliflower mosaic virus 35S promoter. Binding to the as-1-like cis elements mediate auxin- and salicylic acid-inducible transcription. May be involved in the induction of the systemic acquired resistance (SAR) via its interaction with NPR1. Could also bind to the …
AGTCA	1240	-	0.8	TGA5 BZIP26, OBF5, At5g06960	bZIP	A. thaliana		Transcriptional activator that binds specifically to the DNA sequence 5'-TGACG-3'. Recognizes ocs elements like the as-1 motif of the cauliflower mosaic virus 35S promoter. Binding to the as-1-like cis elements mediate auxin- and salicylic acid-inducible transcription. May be involved in the induction of the systemic acquired resistance (SAR) via its interaction with NPR1. Could also bind to the …
CGTCA	232	-	1	TGA5 BZIP26, OBF5, At5g06960	bZIP	A. thaliana		Transcriptional activator that binds specifically to the DNA sequence 5'-TGACG-3'. Recognizes ocs elements like the as-1 motif of the cauliflower mosaic virus 35S promoter. Binding to the as-1-like cis elements mediate auxin- and salicylic acid-inducible transcription. May be involved in the induction of the systemic acquired resistance (SAR) via its interaction with NPR1. Could also bind to the …
CTTCA	237	-	0.8	TGA5 BZIP26, OBF5, At5g06960	bZIP	A. thaliana		Transcriptional activator that binds specifically to the DNA sequence 5'-TGACG-3'. Recognizes ocs elements like the as-1 motif of the cauliflower mosaic virus 35S promoter. Binding to the as-1-like cis elements mediate auxin- and salicylic acid-inducible transcription. May be involved in the induction of the systemic acquired resistance (SAR) via its interaction with NPR1. Could also bind to the …
CTTCA	607	-	0.8	TGA5 BZIP26, OBF5, At5g06960	bZIP	A. thaliana		Transcriptional activator that binds specifically to the DNA sequence 5'-TGACG-3'. Recognizes ocs elements like the as-1 motif of the cauliflower mosaic virus 35S promoter. Binding to the as-1-like cis elements mediate auxin- and salicylic acid-inducible transcription. May be involved in the induction of the systemic acquired resistance (SAR) via its interaction with NPR1. Could also bind to the …
CTTCA	955	-	0.8	TGA5 BZIP26, OBF5, At5g06960	bZIP	A. thaliana		Transcriptional activator that binds specifically to the DNA sequence 5'-TGACG-3'. Recognizes ocs elements like the as-1 motif of the cauliflower mosaic virus 35S promoter. Binding to the as-1-like cis elements mediate auxin- and salicylic acid-inducible transcription. May be involved in the induction of the systemic acquired resistance (SAR) via its interaction with NPR1. Could also bind to the …
CTTCA	1158	-	0.8	TGA5 BZIP26, OBF5, At5g06960	bZIP	A. thaliana		Transcriptional activator that binds specifically to the DNA sequence 5'-TGACG-3'. Recognizes ocs elements like the as-1 motif of the cauliflower mosaic virus 35S promoter. Binding to the as-1-like cis elements mediate auxin- and salicylic acid-inducible transcription. May be involved in the induction of the systemic acquired resistance (SAR) via its interaction with NPR1. Could also bind to the …
CCTCA	1458	-	0.8	TGA5 BZIP26, OBF5, At5g06960	bZIP	A. thaliana		Transcriptional activator that binds specifically to the DNA sequence 5'-TGACG-3'. Recognizes ocs elements like the as-1 motif of the cauliflower mosaic virus 35S promoter. Binding to the as-1-like cis elements mediate auxin- and salicylic acid-inducible transcription. May be involved in the induction of the systemic acquired resistance (SAR) via its interaction with NPR1. Could also bind to the …
CGTCT	250	-	0.8	TGA5 BZIP26, OBF5, At5g06960	bZIP	A. thaliana		Transcriptional activator that binds specifically to the DNA sequence 5'-TGACG-3'. Recognizes ocs elements like the as-1 motif of the cauliflower mosaic virus 35S promoter. Binding to the as-1-like cis elements mediate auxin- and salicylic acid-inducible transcription. May be involved in the induction of the systemic acquired resistance (SAR) via its interaction with NPR1. Could also bind to the …
CGTCT	782	-	0.8	TGA5 BZIP26, OBF5, At5g06960	bZIP	A. thaliana		Transcriptional activator that binds specifically to the DNA sequence 5'-TGACG-3'. Recognizes ocs elements like the as-1 motif of the cauliflower mosaic virus 35S promoter. Binding to the as-1-like cis elements mediate auxin- and salicylic acid-inducible transcription. May be involved in the induction of the systemic acquired resistance (SAR) via its interaction with NPR1. Could also bind to the …
CGTCC	362	-	0.8	TGA5 BZIP26, OBF5, At5g06960	bZIP	A. thaliana		Transcriptional activator that binds specifically to the DNA sequence 5'-TGACG-3'. Recognizes ocs elements like the as-1 motif of the cauliflower mosaic virus 35S promoter. Binding to the as-1-like cis elements mediate auxin- and salicylic acid-inducible transcription. May be involved in the induction of the systemic acquired resistance (SAR) via its interaction with NPR1. Could also bind to the …
GGACG	407	+	0.8	TGA5 BZIP26, OBF5, At5g06960	bZIP	A. thaliana		Transcriptional activator that binds specifically to the DNA sequence 5'-TGACG-3'. Recognizes ocs elements like the as-1 motif of the cauliflower mosaic virus 35S promoter. Binding to the as-1-like cis elements mediate auxin- and salicylic acid-inducible transcription. May be involved in the induction of the systemic acquired resistance (SAR) via its interaction with NPR1. Could also bind to the …
TGAAG	565	+	0.8	TGA5 BZIP26, OBF5, At5g06960	bZIP	A. thaliana		Transcriptional activator that binds specifically to the DNA sequence 5'-TGACG-3'. Recognizes ocs elements like the as-1 motif of the cauliflower mosaic virus 35S promoter. Binding to the as-1-like cis elements mediate auxin- and salicylic acid-inducible transcription. May be involved in the induction of the systemic acquired resistance (SAR) via its interaction with NPR1. Could also bind to the …
TGAAG	789	+	0.8	TGA5 BZIP26, OBF5, At5g06960	bZIP	A. thaliana		Transcriptional activator that binds specifically to the DNA sequence 5'-TGACG-3'. Recognizes ocs elements like the as-1 motif of the cauliflower mosaic virus 35S promoter. Binding to the as-1-like cis elements mediate auxin- and salicylic acid-inducible transcription. May be involved in the induction of the systemic acquired resistance (SAR) via its interaction with NPR1. Could also bind to the …
TGAAG	969	+	0.8	TGA5 BZIP26, OBF5, At5g06960	bZIP	A. thaliana		Transcriptional activator that binds specifically to the DNA sequence 5'-TGACG-3'. Recognizes ocs elements like the as-1 motif of the cauliflower mosaic virus 35S promoter. Binding to the as-1-like cis elements mediate auxin- and salicylic acid-inducible transcription. May be involved in the induction of the systemic acquired resistance (SAR) via its interaction with NPR1. Could also bind to the …
TGTCA	601	-	0.8	TGA5 BZIP26, OBF5, At5g06960	bZIP	A. thaliana		Transcriptional activator that binds specifically to the DNA sequence 5'-TGACG-3'. Recognizes ocs elements like the as-1 motif of the cauliflower mosaic virus 35S promoter. Binding to the as-1-like cis elements mediate auxin- and salicylic acid-inducible transcription. May be involved in the induction of the systemic acquired resistance (SAR) via its interaction with NPR1. Could also bind to the …
TGTCA	913	-	0.8	TGA5 BZIP26, OBF5, At5g06960	bZIP	A. thaliana		Transcriptional activator that binds specifically to the DNA sequence 5'-TGACG-3'. Recognizes ocs elements like the as-1 motif of the cauliflower mosaic virus 35S promoter. Binding to the as-1-like cis elements mediate auxin- and salicylic acid-inducible transcription. May be involved in the induction of the systemic acquired resistance (SAR) via its interaction with NPR1. Could also bind to the …
TGTCA	948	-	0.8	TGA5 BZIP26, OBF5, At5g06960	bZIP	A. thaliana		Transcriptional activator that binds specifically to the DNA sequence 5'-TGACG-3'. Recognizes ocs elements like the as-1 motif of the cauliflower mosaic virus 35S promoter. Binding to the as-1-like cis elements mediate auxin- and salicylic acid-inducible transcription. May be involved in the induction of the systemic acquired resistance (SAR) via its interaction with NPR1. Could also bind to the …
TGTCA	1147	-	0.8	TGA5 BZIP26, OBF5, At5g06960	bZIP	A. thaliana		Transcriptional activator that binds specifically to the DNA sequence 5'-TGACG-3'. Recognizes ocs elements like the as-1 motif of the cauliflower mosaic virus 35S promoter. Binding to the as-1-like cis elements mediate auxin- and salicylic acid-inducible transcription. May be involved in the induction of the systemic acquired resistance (SAR) via its interaction with NPR1. Could also bind to the …
TGTCA	1251	-	0.8	TGA5 BZIP26, OBF5, At5g06960	bZIP	A. thaliana		Transcriptional activator that binds specifically to the DNA sequence 5'-TGACG-3'. Recognizes ocs elements like the as-1 motif of the cauliflower mosaic virus 35S promoter. Binding to the as-1-like cis elements mediate auxin- and salicylic acid-inducible transcription. May be involved in the induction of the systemic acquired resistance (SAR) via its interaction with NPR1. Could also bind to the …
CGTTA	687	-	0.8	TGA5 BZIP26, OBF5, At5g06960	bZIP	A. thaliana		Transcriptional activator that binds specifically to the DNA sequence 5'-TGACG-3'. Recognizes ocs elements like the as-1 motif of the cauliflower mosaic virus 35S promoter. Binding to the as-1-like cis elements mediate auxin- and salicylic acid-inducible transcription. May be involved in the induction of the systemic acquired resistance (SAR) via its interaction with NPR1. Could also bind to the …
CGTAA	722	-	0.8	TGA5 BZIP26, OBF5, At5g06960	bZIP	A. thaliana		Transcriptional activator that binds specifically to the DNA sequence 5'-TGACG-3'. Recognizes ocs elements like the as-1 motif of the cauliflower mosaic virus 35S promoter. Binding to the as-1-like cis elements mediate auxin- and salicylic acid-inducible transcription. May be involved in the induction of the systemic acquired resistance (SAR) via its interaction with NPR1. Could also bind to the …
TGACA	796	+	0.8	TGA5 BZIP26, OBF5, At5g06960	bZIP	A. thaliana		Transcriptional activator that binds specifically to the DNA sequence 5'-TGACG-3'. Recognizes ocs elements like the as-1 motif of the cauliflower mosaic virus 35S promoter. Binding to the as-1-like cis elements mediate auxin- and salicylic acid-inducible transcription. May be involved in the induction of the systemic acquired resistance (SAR) via its interaction with NPR1. Could also bind to the …
TCACG	1112	+	0.8	TGA5 BZIP26, OBF5, At5g06960	bZIP	A. thaliana		Transcriptional activator that binds specifically to the DNA sequence 5'-TGACG-3'. Recognizes ocs elements like the as-1 motif of the cauliflower mosaic virus 35S promoter. Binding to the as-1-like cis elements mediate auxin- and salicylic acid-inducible transcription. May be involved in the induction of the systemic acquired resistance (SAR) via its interaction with NPR1. Could also bind to the …
TGACG	1210	+	1	TGA5 BZIP26, OBF5, At5g06960	bZIP	A. thaliana		Transcriptional activator that binds specifically to the DNA sequence 5'-TGACG-3'. Recognizes ocs elements like the as-1 motif of the cauliflower mosaic virus 35S promoter. Binding to the as-1-like cis elements mediate auxin- and salicylic acid-inducible transcription. May be involved in the induction of the systemic acquired resistance (SAR) via its interaction with NPR1. Could also bind to the …
CGTCA	229	-	0.88	TGA5 BZIP26, OBF5, At5g06960	bZIP	A. thaliana		Transcriptional activator that binds specifically to the DNA sequence 5'-TGACG-3'. Recognizes ocs elements like the as-1 motif of the cauliflower mosaic virus 35S promoter. Binding to the as-1-like cis elements mediate auxin- and salicylic acid-inducible transcription. May be involved in the induction of the systemic acquired resistance (SAR) via its interaction with NPR1. Could also bind to the …
TACAC	29	+	0.82	TGA4 BZIP57, OBF4, At5g10030	bZIP	A. thaliana		Transcriptional activator that binds specifically to the DNA sequence 5'-TGACG-3'. Recognizes ocs elements like the as-1 motif of the cauliflower mosaic virus 35S promoter. Binding to the as-1-like cis elements mediate auxin- and salicylic acid-inducible transcription. May be involved in the induction of the systemic acquired resistance (SAR) via its interaction with NPR1. Could also bind to the …
TGACT	5	+	0.8	TGA4 BZIP57, OBF4, At5g10030	bZIP	A. thaliana		Transcriptional activator that binds specifically to the DNA sequence 5'-TGACG-3'. Recognizes ocs elements like the as-1 motif of the cauliflower mosaic virus 35S promoter. Binding to the as-1-like cis elements mediate auxin- and salicylic acid-inducible transcription. May be involved in the induction of the systemic acquired resistance (SAR) via its interaction with NPR1. Could also bind to the …
TGACT	832	+	0.8	TGA4 BZIP57, OBF4, At5g10030	bZIP	A. thaliana		Transcriptional activator that binds specifically to the DNA sequence 5'-TGACG-3'. Recognizes ocs elements like the as-1 motif of the cauliflower mosaic virus 35S promoter. Binding to the as-1-like cis elements mediate auxin- and salicylic acid-inducible transcription. May be involved in the induction of the systemic acquired resistance (SAR) via its interaction with NPR1. Could also bind to the …
AGTCA	111	-	0.8	TGA4 BZIP57, OBF4, At5g10030	bZIP	A. thaliana		Transcriptional activator that binds specifically to the DNA sequence 5'-TGACG-3'. Recognizes ocs elements like the as-1 motif of the cauliflower mosaic virus 35S promoter. Binding to the as-1-like cis elements mediate auxin- and salicylic acid-inducible transcription. May be involved in the induction of the systemic acquired resistance (SAR) via its interaction with NPR1. Could also bind to the …
AGTCA	1240	-	0.8	TGA4 BZIP57, OBF4, At5g10030	bZIP	A. thaliana		Transcriptional activator that binds specifically to the DNA sequence 5'-TGACG-3'. Recognizes ocs elements like the as-1 motif of the cauliflower mosaic virus 35S promoter. Binding to the as-1-like cis elements mediate auxin- and salicylic acid-inducible transcription. May be involved in the induction of the systemic acquired resistance (SAR) via its interaction with NPR1. Could also bind to the …
CGTCA	232	-	1	TGA4 BZIP57, OBF4, At5g10030	bZIP	A. thaliana		Transcriptional activator that binds specifically to the DNA sequence 5'-TGACG-3'. Recognizes ocs elements like the as-1 motif of the cauliflower mosaic virus 35S promoter. Binding to the as-1-like cis elements mediate auxin- and salicylic acid-inducible transcription. May be involved in the induction of the systemic acquired resistance (SAR) via its interaction with NPR1. Could also bind to the …
CTTCA	237	-	0.8	TGA4 BZIP57, OBF4, At5g10030	bZIP	A. thaliana		Transcriptional activator that binds specifically to the DNA sequence 5'-TGACG-3'. Recognizes ocs elements like the as-1 motif of the cauliflower mosaic virus 35S promoter. Binding to the as-1-like cis elements mediate auxin- and salicylic acid-inducible transcription. May be involved in the induction of the systemic acquired resistance (SAR) via its interaction with NPR1. Could also bind to the …
CTTCA	607	-	0.8	TGA4 BZIP57, OBF4, At5g10030	bZIP	A. thaliana		Transcriptional activator that binds specifically to the DNA sequence 5'-TGACG-3'. Recognizes ocs elements like the as-1 motif of the cauliflower mosaic virus 35S promoter. Binding to the as-1-like cis elements mediate auxin- and salicylic acid-inducible transcription. May be involved in the induction of the systemic acquired resistance (SAR) via its interaction with NPR1. Could also bind to the …
CTTCA	955	-	0.8	TGA4 BZIP57, OBF4, At5g10030	bZIP	A. thaliana		Transcriptional activator that binds specifically to the DNA sequence 5'-TGACG-3'. Recognizes ocs elements like the as-1 motif of the cauliflower mosaic virus 35S promoter. Binding to the as-1-like cis elements mediate auxin- and salicylic acid-inducible transcription. May be involved in the induction of the systemic acquired resistance (SAR) via its interaction with NPR1. Could also bind to the …
CTTCA	1158	-	0.8	TGA4 BZIP57, OBF4, At5g10030	bZIP	A. thaliana		Transcriptional activator that binds specifically to the DNA sequence 5'-TGACG-3'. Recognizes ocs elements like the as-1 motif of the cauliflower mosaic virus 35S promoter. Binding to the as-1-like cis elements mediate auxin- and salicylic acid-inducible transcription. May be involved in the induction of the systemic acquired resistance (SAR) via its interaction with NPR1. Could also bind to the …
CCTCA	1458	-	0.8	TGA4 BZIP57, OBF4, At5g10030	bZIP	A. thaliana		Transcriptional activator that binds specifically to the DNA sequence 5'-TGACG-3'. Recognizes ocs elements like the as-1 motif of the cauliflower mosaic virus 35S promoter. Binding to the as-1-like cis elements mediate auxin- and salicylic acid-inducible transcription. May be involved in the induction of the systemic acquired resistance (SAR) via its interaction with NPR1. Could also bind to the …
CGTCT	250	-	0.8	TGA4 BZIP57, OBF4, At5g10030	bZIP	A. thaliana		Transcriptional activator that binds specifically to the DNA sequence 5'-TGACG-3'. Recognizes ocs elements like the as-1 motif of the cauliflower mosaic virus 35S promoter. Binding to the as-1-like cis elements mediate auxin- and salicylic acid-inducible transcription. May be involved in the induction of the systemic acquired resistance (SAR) via its interaction with NPR1. Could also bind to the …
CGTCT	782	-	0.8	TGA4 BZIP57, OBF4, At5g10030	bZIP	A. thaliana		Transcriptional activator that binds specifically to the DNA sequence 5'-TGACG-3'. Recognizes ocs elements like the as-1 motif of the cauliflower mosaic virus 35S promoter. Binding to the as-1-like cis elements mediate auxin- and salicylic acid-inducible transcription. May be involved in the induction of the systemic acquired resistance (SAR) via its interaction with NPR1. Could also bind to the …
CGTCC	362	-	0.8	TGA4 BZIP57, OBF4, At5g10030	bZIP	A. thaliana		Transcriptional activator that binds specifically to the DNA sequence 5'-TGACG-3'. Recognizes ocs elements like the as-1 motif of the cauliflower mosaic virus 35S promoter. Binding to the as-1-like cis elements mediate auxin- and salicylic acid-inducible transcription. May be involved in the induction of the systemic acquired resistance (SAR) via its interaction with NPR1. Could also bind to the …
GGACG	407	+	0.8	TGA4 BZIP57, OBF4, At5g10030	bZIP	A. thaliana		Transcriptional activator that binds specifically to the DNA sequence 5'-TGACG-3'. Recognizes ocs elements like the as-1 motif of the cauliflower mosaic virus 35S promoter. Binding to the as-1-like cis elements mediate auxin- and salicylic acid-inducible transcription. May be involved in the induction of the systemic acquired resistance (SAR) via its interaction with NPR1. Could also bind to the …
TGAAG	565	+	0.8	TGA4 BZIP57, OBF4, At5g10030	bZIP	A. thaliana		Transcriptional activator that binds specifically to the DNA sequence 5'-TGACG-3'. Recognizes ocs elements like the as-1 motif of the cauliflower mosaic virus 35S promoter. Binding to the as-1-like cis elements mediate auxin- and salicylic acid-inducible transcription. May be involved in the induction of the systemic acquired resistance (SAR) via its interaction with NPR1. Could also bind to the …
TGAAG	789	+	0.8	TGA4 BZIP57, OBF4, At5g10030	bZIP	A. thaliana		Transcriptional activator that binds specifically to the DNA sequence 5'-TGACG-3'. Recognizes ocs elements like the as-1 motif of the cauliflower mosaic virus 35S promoter. Binding to the as-1-like cis elements mediate auxin- and salicylic acid-inducible transcription. May be involved in the induction of the systemic acquired resistance (SAR) via its interaction with NPR1. Could also bind to the …
TGAAG	969	+	0.8	TGA4 BZIP57, OBF4, At5g10030	bZIP	A. thaliana		Transcriptional activator that binds specifically to the DNA sequence 5'-TGACG-3'. Recognizes ocs elements like the as-1 motif of the cauliflower mosaic virus 35S promoter. Binding to the as-1-like cis elements mediate auxin- and salicylic acid-inducible transcription. May be involved in the induction of the systemic acquired resistance (SAR) via its interaction with NPR1. Could also bind to the …
TGTCA	601	-	0.8	TGA4 BZIP57, OBF4, At5g10030	bZIP	A. thaliana		Transcriptional activator that binds specifically to the DNA sequence 5'-TGACG-3'. Recognizes ocs elements like the as-1 motif of the cauliflower mosaic virus 35S promoter. Binding to the as-1-like cis elements mediate auxin- and salicylic acid-inducible transcription. May be involved in the induction of the systemic acquired resistance (SAR) via its interaction with NPR1. Could also bind to the …
TGTCA	913	-	0.8	TGA4 BZIP57, OBF4, At5g10030	bZIP	A. thaliana		Transcriptional activator that binds specifically to the DNA sequence 5'-TGACG-3'. Recognizes ocs elements like the as-1 motif of the cauliflower mosaic virus 35S promoter. Binding to the as-1-like cis elements mediate auxin- and salicylic acid-inducible transcription. May be involved in the induction of the systemic acquired resistance (SAR) via its interaction with NPR1. Could also bind to the …
TGTCA	948	-	0.8	TGA4 BZIP57, OBF4, At5g10030	bZIP	A. thaliana		Transcriptional activator that binds specifically to the DNA sequence 5'-TGACG-3'. Recognizes ocs elements like the as-1 motif of the cauliflower mosaic virus 35S promoter. Binding to the as-1-like cis elements mediate auxin- and salicylic acid-inducible transcription. May be involved in the induction of the systemic acquired resistance (SAR) via its interaction with NPR1. Could also bind to the …
TGTCA	1147	-	0.8	TGA4 BZIP57, OBF4, At5g10030	bZIP	A. thaliana		Transcriptional activator that binds specifically to the DNA sequence 5'-TGACG-3'. Recognizes ocs elements like the as-1 motif of the cauliflower mosaic virus 35S promoter. Binding to the as-1-like cis elements mediate auxin- and salicylic acid-inducible transcription. May be involved in the induction of the systemic acquired resistance (SAR) via its interaction with NPR1. Could also bind to the …
TGTCA	1251	-	0.8	TGA4 BZIP57, OBF4, At5g10030	bZIP	A. thaliana		Transcriptional activator that binds specifically to the DNA sequence 5'-TGACG-3'. Recognizes ocs elements like the as-1 motif of the cauliflower mosaic virus 35S promoter. Binding to the as-1-like cis elements mediate auxin- and salicylic acid-inducible transcription. May be involved in the induction of the systemic acquired resistance (SAR) via its interaction with NPR1. Could also bind to the …
CGTTA	687	-	0.8	TGA4 BZIP57, OBF4, At5g10030	bZIP	A. thaliana		Transcriptional activator that binds specifically to the DNA sequence 5'-TGACG-3'. Recognizes ocs elements like the as-1 motif of the cauliflower mosaic virus 35S promoter. Binding to the as-1-like cis elements mediate auxin- and salicylic acid-inducible transcription. May be involved in the induction of the systemic acquired resistance (SAR) via its interaction with NPR1. Could also bind to the …
CGTAA	722	-	0.8	TGA4 BZIP57, OBF4, At5g10030	bZIP	A. thaliana		Transcriptional activator that binds specifically to the DNA sequence 5'-TGACG-3'. Recognizes ocs elements like the as-1 motif of the cauliflower mosaic virus 35S promoter. Binding to the as-1-like cis elements mediate auxin- and salicylic acid-inducible transcription. May be involved in the induction of the systemic acquired resistance (SAR) via its interaction with NPR1. Could also bind to the …
TGACA	796	+	0.8	TGA4 BZIP57, OBF4, At5g10030	bZIP	A. thaliana		Transcriptional activator that binds specifically to the DNA sequence 5'-TGACG-3'. Recognizes ocs elements like the as-1 motif of the cauliflower mosaic virus 35S promoter. Binding to the as-1-like cis elements mediate auxin- and salicylic acid-inducible transcription. May be involved in the induction of the systemic acquired resistance (SAR) via its interaction with NPR1. Could also bind to the …
TCACG	1112	+	0.8	TGA4 BZIP57, OBF4, At5g10030	bZIP	A. thaliana		Transcriptional activator that binds specifically to the DNA sequence 5'-TGACG-3'. Recognizes ocs elements like the as-1 motif of the cauliflower mosaic virus 35S promoter. Binding to the as-1-like cis elements mediate auxin- and salicylic acid-inducible transcription. May be involved in the induction of the systemic acquired resistance (SAR) via its interaction with NPR1. Could also bind to the …
TGACG	1210	+	1	TGA4 BZIP57, OBF4, At5g10030	bZIP	A. thaliana		Transcriptional activator that binds specifically to the DNA sequence 5'-TGACG-3'. Recognizes ocs elements like the as-1 motif of the cauliflower mosaic virus 35S promoter. Binding to the as-1-like cis elements mediate auxin- and salicylic acid-inducible transcription. May be involved in the induction of the systemic acquired resistance (SAR) via its interaction with NPR1. Could also bind to the …
CGTCA	229	-	0.88	TGA4 BZIP57, OBF4, At5g10030	bZIP	A. thaliana		Transcriptional activator that binds specifically to the DNA sequence 5'-TGACG-3'. Recognizes ocs elements like the as-1 motif of the cauliflower mosaic virus 35S promoter. Binding to the as-1-like cis elements mediate auxin- and salicylic acid-inducible transcription. May be involved in the induction of the systemic acquired resistance (SAR) via its interaction with NPR1. Could also bind to the …
TGACT	5	+	0.8	TGA7 BZIP50, At1g77920	bZIP	A. thaliana		Recognizes ocs elements like the as-1 motif of the cauliflower mosaic virus 35S promoter. Binding to the as-1-like cis elements mediate auxin- and salicylic acid-inducible transcription. May be involved in the induction of the systemic acquired resistance (SAR) via its interaction with NPR1 PMID:12953119, defense response to bacterium 17369431
TGACT	832	+	0.8	TGA7 BZIP50, At1g77920	bZIP	A. thaliana		Recognizes ocs elements like the as-1 motif of the cauliflower mosaic virus 35S promoter. Binding to the as-1-like cis elements mediate auxin- and salicylic acid-inducible transcription. May be involved in the induction of the systemic acquired resistance (SAR) via its interaction with NPR1 PMID:12953119, defense response to bacterium 17369431
AGTCA	111	-	0.8	TGA7 BZIP50, At1g77920	bZIP	A. thaliana		Recognizes ocs elements like the as-1 motif of the cauliflower mosaic virus 35S promoter. Binding to the as-1-like cis elements mediate auxin- and salicylic acid-inducible transcription. May be involved in the induction of the systemic acquired resistance (SAR) via its interaction with NPR1 PMID:12953119, defense response to bacterium 17369431
AGTCA	1240	-	0.8	TGA7 BZIP50, At1g77920	bZIP	A. thaliana		Recognizes ocs elements like the as-1 motif of the cauliflower mosaic virus 35S promoter. Binding to the as-1-like cis elements mediate auxin- and salicylic acid-inducible transcription. May be involved in the induction of the systemic acquired resistance (SAR) via its interaction with NPR1 PMID:12953119, defense response to bacterium 17369431
CGTCA	232	-	1	TGA7 BZIP50, At1g77920	bZIP	A. thaliana		Recognizes ocs elements like the as-1 motif of the cauliflower mosaic virus 35S promoter. Binding to the as-1-like cis elements mediate auxin- and salicylic acid-inducible transcription. May be involved in the induction of the systemic acquired resistance (SAR) via its interaction with NPR1 PMID:12953119, defense response to bacterium 17369431
CTTCA	237	-	0.8	TGA7 BZIP50, At1g77920	bZIP	A. thaliana		Recognizes ocs elements like the as-1 motif of the cauliflower mosaic virus 35S promoter. Binding to the as-1-like cis elements mediate auxin- and salicylic acid-inducible transcription. May be involved in the induction of the systemic acquired resistance (SAR) via its interaction with NPR1 PMID:12953119, defense response to bacterium 17369431
CTTCA	607	-	0.8	TGA7 BZIP50, At1g77920	bZIP	A. thaliana		Recognizes ocs elements like the as-1 motif of the cauliflower mosaic virus 35S promoter. Binding to the as-1-like cis elements mediate auxin- and salicylic acid-inducible transcription. May be involved in the induction of the systemic acquired resistance (SAR) via its interaction with NPR1 PMID:12953119, defense response to bacterium 17369431
CTTCA	955	-	0.8	TGA7 BZIP50, At1g77920	bZIP	A. thaliana		Recognizes ocs elements like the as-1 motif of the cauliflower mosaic virus 35S promoter. Binding to the as-1-like cis elements mediate auxin- and salicylic acid-inducible transcription. May be involved in the induction of the systemic acquired resistance (SAR) via its interaction with NPR1 PMID:12953119, defense response to bacterium 17369431
CTTCA	1158	-	0.8	TGA7 BZIP50, At1g77920	bZIP	A. thaliana		Recognizes ocs elements like the as-1 motif of the cauliflower mosaic virus 35S promoter. Binding to the as-1-like cis elements mediate auxin- and salicylic acid-inducible transcription. May be involved in the induction of the systemic acquired resistance (SAR) via its interaction with NPR1 PMID:12953119, defense response to bacterium 17369431
CCTCA	1458	-	0.8	TGA7 BZIP50, At1g77920	bZIP	A. thaliana		Recognizes ocs elements like the as-1 motif of the cauliflower mosaic virus 35S promoter. Binding to the as-1-like cis elements mediate auxin- and salicylic acid-inducible transcription. May be involved in the induction of the systemic acquired resistance (SAR) via its interaction with NPR1 PMID:12953119, defense response to bacterium 17369431
CGTCT	250	-	0.8	TGA7 BZIP50, At1g77920	bZIP	A. thaliana		Recognizes ocs elements like the as-1 motif of the cauliflower mosaic virus 35S promoter. Binding to the as-1-like cis elements mediate auxin- and salicylic acid-inducible transcription. May be involved in the induction of the systemic acquired resistance (SAR) via its interaction with NPR1 PMID:12953119, defense response to bacterium 17369431
CGTCT	782	-	0.8	TGA7 BZIP50, At1g77920	bZIP	A. thaliana		Recognizes ocs elements like the as-1 motif of the cauliflower mosaic virus 35S promoter. Binding to the as-1-like cis elements mediate auxin- and salicylic acid-inducible transcription. May be involved in the induction of the systemic acquired resistance (SAR) via its interaction with NPR1 PMID:12953119, defense response to bacterium 17369431
CGTCC	362	-	0.8	TGA7 BZIP50, At1g77920	bZIP	A. thaliana		Recognizes ocs elements like the as-1 motif of the cauliflower mosaic virus 35S promoter. Binding to the as-1-like cis elements mediate auxin- and salicylic acid-inducible transcription. May be involved in the induction of the systemic acquired resistance (SAR) via its interaction with NPR1 PMID:12953119, defense response to bacterium 17369431
GGACG	407	+	0.8	TGA7 BZIP50, At1g77920	bZIP	A. thaliana		Recognizes ocs elements like the as-1 motif of the cauliflower mosaic virus 35S promoter. Binding to the as-1-like cis elements mediate auxin- and salicylic acid-inducible transcription. May be involved in the induction of the systemic acquired resistance (SAR) via its interaction with NPR1 PMID:12953119, defense response to bacterium 17369431
TGAAG	565	+	0.8	TGA7 BZIP50, At1g77920	bZIP	A. thaliana		Recognizes ocs elements like the as-1 motif of the cauliflower mosaic virus 35S promoter. Binding to the as-1-like cis elements mediate auxin- and salicylic acid-inducible transcription. May be involved in the induction of the systemic acquired resistance (SAR) via its interaction with NPR1 PMID:12953119, defense response to bacterium 17369431
TGAAG	789	+	0.8	TGA7 BZIP50, At1g77920	bZIP	A. thaliana		Recognizes ocs elements like the as-1 motif of the cauliflower mosaic virus 35S promoter. Binding to the as-1-like cis elements mediate auxin- and salicylic acid-inducible transcription. May be involved in the induction of the systemic acquired resistance (SAR) via its interaction with NPR1 PMID:12953119, defense response to bacterium 17369431
TGAAG	969	+	0.8	TGA7 BZIP50, At1g77920	bZIP	A. thaliana		Recognizes ocs elements like the as-1 motif of the cauliflower mosaic virus 35S promoter. Binding to the as-1-like cis elements mediate auxin- and salicylic acid-inducible transcription. May be involved in the induction of the systemic acquired resistance (SAR) via its interaction with NPR1 PMID:12953119, defense response to bacterium 17369431
TGTCA	601	-	0.8	TGA7 BZIP50, At1g77920	bZIP	A. thaliana		Recognizes ocs elements like the as-1 motif of the cauliflower mosaic virus 35S promoter. Binding to the as-1-like cis elements mediate auxin- and salicylic acid-inducible transcription. May be involved in the induction of the systemic acquired resistance (SAR) via its interaction with NPR1 PMID:12953119, defense response to bacterium 17369431
TGTCA	913	-	0.8	TGA7 BZIP50, At1g77920	bZIP	A. thaliana		Recognizes ocs elements like the as-1 motif of the cauliflower mosaic virus 35S promoter. Binding to the as-1-like cis elements mediate auxin- and salicylic acid-inducible transcription. May be involved in the induction of the systemic acquired resistance (SAR) via its interaction with NPR1 PMID:12953119, defense response to bacterium 17369431
TGTCA	948	-	0.8	TGA7 BZIP50, At1g77920	bZIP	A. thaliana		Recognizes ocs elements like the as-1 motif of the cauliflower mosaic virus 35S promoter. Binding to the as-1-like cis elements mediate auxin- and salicylic acid-inducible transcription. May be involved in the induction of the systemic acquired resistance (SAR) via its interaction with NPR1 PMID:12953119, defense response to bacterium 17369431
TGTCA	1147	-	0.8	TGA7 BZIP50, At1g77920	bZIP	A. thaliana		Recognizes ocs elements like the as-1 motif of the cauliflower mosaic virus 35S promoter. Binding to the as-1-like cis elements mediate auxin- and salicylic acid-inducible transcription. May be involved in the induction of the systemic acquired resistance (SAR) via its interaction with NPR1 PMID:12953119, defense response to bacterium 17369431
TGTCA	1251	-	0.8	TGA7 BZIP50, At1g77920	bZIP	A. thaliana		Recognizes ocs elements like the as-1 motif of the cauliflower mosaic virus 35S promoter. Binding to the as-1-like cis elements mediate auxin- and salicylic acid-inducible transcription. May be involved in the induction of the systemic acquired resistance (SAR) via its interaction with NPR1 PMID:12953119, defense response to bacterium 17369431
CGTTA	687	-	0.8	TGA7 BZIP50, At1g77920	bZIP	A. thaliana		Recognizes ocs elements like the as-1 motif of the cauliflower mosaic virus 35S promoter. Binding to the as-1-like cis elements mediate auxin- and salicylic acid-inducible transcription. May be involved in the induction of the systemic acquired resistance (SAR) via its interaction with NPR1 PMID:12953119, defense response to bacterium 17369431
CGTAA	722	-	0.8	TGA7 BZIP50, At1g77920	bZIP	A. thaliana		Recognizes ocs elements like the as-1 motif of the cauliflower mosaic virus 35S promoter. Binding to the as-1-like cis elements mediate auxin- and salicylic acid-inducible transcription. May be involved in the induction of the systemic acquired resistance (SAR) via its interaction with NPR1 PMID:12953119, defense response to bacterium 17369431
TGACA	796	+	0.8	TGA7 BZIP50, At1g77920	bZIP	A. thaliana		Recognizes ocs elements like the as-1 motif of the cauliflower mosaic virus 35S promoter. Binding to the as-1-like cis elements mediate auxin- and salicylic acid-inducible transcription. May be involved in the induction of the systemic acquired resistance (SAR) via its interaction with NPR1 PMID:12953119, defense response to bacterium 17369431
TCACG	1112	+	0.8	TGA7 BZIP50, At1g77920	bZIP	A. thaliana		Recognizes ocs elements like the as-1 motif of the cauliflower mosaic virus 35S promoter. Binding to the as-1-like cis elements mediate auxin- and salicylic acid-inducible transcription. May be involved in the induction of the systemic acquired resistance (SAR) via its interaction with NPR1 PMID:12953119, defense response to bacterium 17369431
TGACG	1210	+	1	TGA7 BZIP50, At1g77920	bZIP	A. thaliana		Recognizes ocs elements like the as-1 motif of the cauliflower mosaic virus 35S promoter. Binding to the as-1-like cis elements mediate auxin- and salicylic acid-inducible transcription. May be involved in the induction of the systemic acquired resistance (SAR) via its interaction with NPR1 PMID:12953119, defense response to bacterium 17369431
TGACT	5	+	0.8	TGA6 BZIP45, At3g12250	bZIP	A. thaliana		Recognizes ocs elements like the as-1 motif of the cauliflower mosaic virus 35S promoter. Binding to the as-1-like cis elements mediate auxin- and salicylic acid-inducible transcription. May be involved in the induction of the systemic acquired resistance (SAR) via its interaction with NPR1. Could also bind to the Hex-motif (5'-TGACGTGG-3') another cis-acting element found in plant histone promot…
TGACT	832	+	0.8	TGA6 BZIP45, At3g12250	bZIP	A. thaliana		Recognizes ocs elements like the as-1 motif of the cauliflower mosaic virus 35S promoter. Binding to the as-1-like cis elements mediate auxin- and salicylic acid-inducible transcription. May be involved in the induction of the systemic acquired resistance (SAR) via its interaction with NPR1. Could also bind to the Hex-motif (5'-TGACGTGG-3') another cis-acting element found in plant histone promot…
AGTCA	111	-	0.8	TGA6 BZIP45, At3g12250	bZIP	A. thaliana		Recognizes ocs elements like the as-1 motif of the cauliflower mosaic virus 35S promoter. Binding to the as-1-like cis elements mediate auxin- and salicylic acid-inducible transcription. May be involved in the induction of the systemic acquired resistance (SAR) via its interaction with NPR1. Could also bind to the Hex-motif (5'-TGACGTGG-3') another cis-acting element found in plant histone promot…
[truncated: 3,822 more rows]
